# Supplementary material for: The [4+1] cyclization reaction of 2-hydroxylimides and trimethylsulfoxonium iodide for the synthesis of 3-amino-2,3-dihydrobenzofurans
Source: Royal Society of Chemistry journal article supplement (doi:10.1039/d2nj03131k), 2022-01-01

## Supporting Information

### **The [4 + 1] cyclization reaction of 2-hydroxyimides and the trimethylsulfoxonium iodide for the synthesis 3-amino-2,3- dihydrobenzofurans**

Zhongxue Fang,<sup>a</sup> Yujie Zhang,<sup>a</sup> Yongsheng Guo,<sup>a</sup> Qihao Jin,<sup>a</sup> Hongyue Zhu,<sup>a</sup> Hongsen Xiu,<sup>a</sup>

Zhenhua Liu<sup>\*b</sup> and Yu Wang<sup>\*a</sup>

<sup>a</sup>School of Chemistry and Environmental Engineering, Yancheng Teachers University, Yancheng  
City 224007, Jiangsu Province, People's Republic of China.

<sup>b</sup>College of Chemistry, Chemical Engineering and Materials Science, Shandong Normal  
University, Jinan 250014, People's Republic of China.

*E-mail: fangzhongxue120@163.com. liuzhenhua2012@163.com*

## Contents

|                                                                                |     |
|--------------------------------------------------------------------------------|-----|
| Table of contents.....                                                         | S2  |
| 1. General information.....                                                    | S3  |
| 2. General procedures and characterization data for all reaction products..... | S3  |
| 3. NMR spectra copies.....                                                     | S20 |

## 1. General information

Unless otherwise noted, all chemicals were purchased from commercial suppliers (Adamas, Aladdin, J&K etc) and used without further purification.  $^1\text{H}$  NMR and  $^{13}\text{C}$  NMR were recorded at ambient temperature on a 400 MHz spectrometer (101 MHz for  $^{13}\text{C}$  NMR). NMR experiments are reported in  $\delta$  units, parts per million (ppm), and were referenced to  $\text{CDCl}_3$  ( $\delta$  7.26 or 77.0 ppm) as the internal standard. The coupling constants  $J$  are given in Hertz. Mass spectra were recorded on BRUKER AutoflexIII Smartbeam MS-spectrometer. High resolution mass spectra (HRMS) were recorded on Bruker microTof by using ESI method. Column chromatography was performed using EM silica gel 60 (300–400 mesh).

## 2. General procedures and characterization data for all reaction products<sup>1</sup>

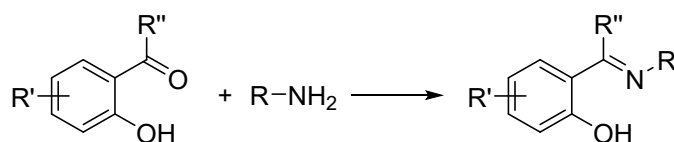

Scheme S1

The typical experimental procedure for synthesis of 2-((phenylimino)methyl)phenol **1a**: Salicylaldehyde (1.0 mmol, 0.104 mL), aniline (1.1 mmol, 0.101 mL) and ethanol absolute (5.0 mL) was charged in a 25 mL round bottom flask equipped with stirring bar. Then, the acetic acid (0.1 mmol, 0.006 mL) and 4Å MS was added into the reaction system. The reaction was heated up to 80 °C and was refluxed for 6 h. After the reaction finished, the mixture was cooled to -10 °C. The pure product **1a** was obtained by filtration and recrystallization.

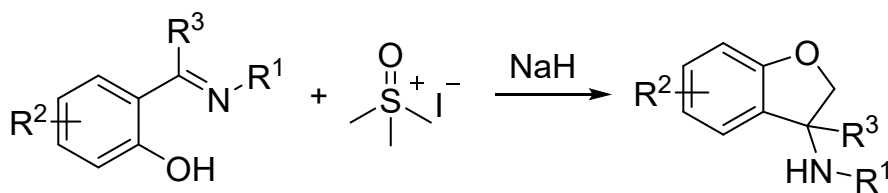

Scheme S2

The typical experimental procedure for synthesis of *N*-phenyl-2,3-dihydrobenzofuran-3-amine **2a**: trimethylsulfoxonium iodide (0.6 mmol, 0.196 mg), DMSO (5.0 mL) and NaH (0.8 mmol, w% 60%, 0.032 g) were added into a 25 mL schlenk flask under N<sub>2</sub> atmosphere at room temperature with a magnetic stirrer bar. After 15 minutes of stirring, the 2-((phenylimino)methyl)phenol **1a** (0.4 mmol, 52.6 mg) was added slowly. The mixture was continue stirred for 3 h at 40 °C under N<sub>2</sub> atmosphere. After the reaction finished, the reaction mixture was allowed to attain room temperature and was diluted with CH<sub>2</sub>Cl<sub>2</sub> (3×10 mL). The mixture was filtered through Celite pad and washed sufficiently with H<sub>2</sub>O (3×20 mL). The filtrate was concentrated under reduced pressure and then purified by column chromatography using hexane/ethyl acetate as eluents to afford the desired pure product **2a**.

---

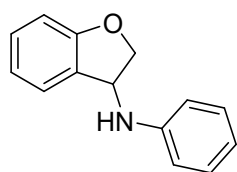

*N*-phenyl-2,3-dihydrobenzofuran-3-amine (**2a**). Colorless liquid. <sup>1</sup>H NMR (400 MHz, CDCl<sub>3</sub>) δ 7.30 (d, *J* = 7.2 Hz, 1H), 7.23-7.12 (m, 3H), 6.91-6.80 (m, 2H), 6.73 (t, *J* = 7.2 Hz, 1H), 6.52 (d, *J* = 8.4 Hz, 2H), 5.10 (s, 1H), 4.61 (q, *J* = 7.2, 9.6 Hz, 1H), 4.31 (q, *J* = 7.2, 9.6 Hz, 1H), 3.89 (s, 1H). <sup>13</sup>C NMR (101 MHz, CDCl<sub>3</sub>) δ 160.0, 146.2, 129.9, 129.3, 127.2, 125.2, 120.7, 118.0, 113.0, 110.1, 77.4, 55.0. HRMS (ESI) Calcd. for C<sub>14</sub>H<sub>14</sub>NO [M+H]<sup>+</sup>, 212.1075. Found: m/z 212.1078.

---

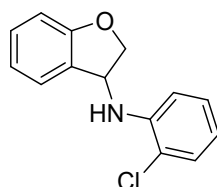

*N*-(2-chlorophenyl)-2,3-dihydrobenzofuran-3-amine (**2b**). Colorless liquid. <sup>1</sup>H NMR (400 MHz, CDCl<sub>3</sub>) δ 7.37 (d, *J* = 7.2 Hz, 2H), 7.29-7.20 (m, 2H), 7.19-7.10 (m, 1H), 6.96-6.84 (m, 2H), 6.72-6.62 (m, 2H), 5.26-5.14 (m, 1H), 4.71 (q, *J* = 7.2, 9.2 Hz, 1H), 4.61 (d, *J* = 6.8 Hz, 1H),

4.36 (q,  $J = 4.4, 9.6$  Hz, 1H).  $^{13}\text{C}$  NMR (101 MHz,  $\text{CDCl}_3$ )  $\delta$  160.1, 142.3, 130.2, 129.5, 127.7, 126.7, 125.2, 121.0, 119.5, 118.0, 111.3, 110.3, 77.5, 55.1. HRMS (ESI) Calcd. for  $\text{C}_{14}\text{H}_{13}\text{ClNO}$   $[\text{M}+\text{H}]^+$ , 246.0686. Found:  $m/z$  246.0688.

---

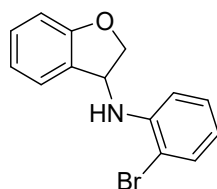

*N*-(2-bromophenyl)-2,3-dihydrobenzofuran-3-amine (**2c**). Colorless liquid.  $^1\text{H}$  NMR (400 MHz,  $\text{CDCl}_3$ )  $\delta$  7.45-7.38 (m, 1H), 7.35 (d,  $J = 7.6$  Hz, 1H), 7.27-7.20 (m, 1H), 7.19-7.12 (m, 1H), 6.95-6.81 (m, 2H), 6.66-6.52 (m, 2H), 5.22-5.11 (m, 1H), 4.71 (q,  $J = 7.2, 9.6$  Hz, 1H), 4.62 (d,  $J = 6.8$  Hz, 1H), 4.33 (q,  $J = 4.4, 7.6$  Hz, 1H).  $^{13}\text{C}$  NMR (101 MHz,  $\text{CDCl}_3$ )  $\delta$  160.1, 143.3, 132.7, 130.2, 128.4, 126.6, 125.1, 121.0, 118.5, 111.3, 110.3, 109.9, 77.4, 55.3. HRMS (ESI) Calcd. for  $\text{C}_{14}\text{H}_{13}\text{BrNO}$   $[\text{M}+\text{H}]^+$ , 290.0181. Found:  $m/z$  290.0185.

---

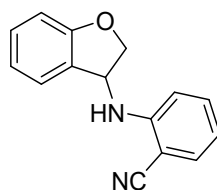

2-((2,3-dihydrobenzofuran-3-yl)amino)benzonitrile (**2d**). Colorless liquid.  $^1\text{H}$  NMR (400 MHz,  $\text{CDCl}_3$ )  $\delta$  7.46-7.37 (m, 2H), 7.35 (d,  $J = 7.6$  Hz, 1H), 7.29-7.22 (m, 1H), 6.78-6.66 (m, 2H), 6.93 (t,  $J = 7.2$  Hz, 1H), 6.88 (d,  $J = 8.0$  Hz, 1H), 6.78-6.66 (m, 2H), 5.34-5.17 (m, 1H), 4.83 (d,  $J = 6.9$  Hz, 1H), 4.74 (q,  $J = 7.6, 10.0$  Hz, 1H), 4.36 (q,  $J = 4.0, 9.6$  Hz, 1H).  $^{13}\text{C}$  NMR (101 MHz,  $\text{CDCl}_3$ )  $\delta$  160.0, 148.2, 134.2, 133.1, 130.4, 125.6, 125.1, 121.1, 117.38, 117.3, 110.7, 110.3, 96.4, 76.9, 54.8. HRMS (ESI) Calcd. for  $\text{C}_{15}\text{H}_{13}\text{N}_2\text{O}$   $[\text{M}+\text{H}]^+$ , 237.1028. Found:  $m/z$  237.1031.

---

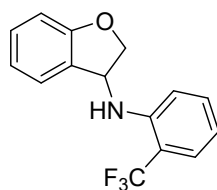

*N*-(2-(trifluoromethyl)phenyl)-2,3-dihydrobenzofuran-3-amine (**2e**). Colorless liquid.

**<sup>1</sup>H NMR** (400 MHz, CDCl<sub>3</sub>) δ 7.47 (d, *J* = 7.6 Hz, 1H), 7.42-7.31 (m, 2H), 7.25 (t, *J* = 7.6 Hz, 1H), 6.94 (t, *J* = 7.2 Hz, 1H), 6.89 (d, *J* = 8.0 Hz, 1H), 6.78 (t, *J* = 7.6 Hz, 1H), 6.72 (d, *J* = 8.4 Hz, 1H). **<sup>13</sup>C NMR** (101 MHz, CDCl<sub>3</sub>) δ 160.2, 144.0 (d, *J* = 1.2 Hz), 133.1, 130.4, 128.9, 127.0 (q, *J* = 5.3, 10.9 Hz), 126.5, 126.2, 125.0, 123.5, 121.2 (d, *J* = 39.1 Hz), 116.9, 114.3 (q, *J* = 29.2, 58.6 Hz), 112.1, 110.4, 77.6, 55.5. **HRMS** (ESI) Calcd. for C<sub>15</sub>H<sub>13</sub>F<sub>3</sub>NO [M+H]<sup>+</sup>, 280.0949. Found: m/z 280.0950.

---

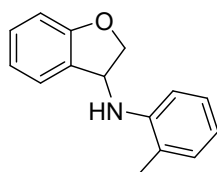

*N*-(*o*-tolyl)-2,3-dihydrobenzofuran-3-amine (**2f**). Colorless liquid. **<sup>1</sup>H NMR** (400 MHz, CDCl<sub>3</sub>) δ 7.36 (d, *J* = 7.6 Hz, 1H), 7.27-7.19 (m, 1H), 7.17-7.10 (m, 1H), 7.07 (d, *J* = 7.6 Hz), 6.94-6.83 (m, 2H), 6.74-6.67 (m, 1H), 6.59 (d, *J* = 7.6 Hz, 1H), 5.19 (q, *J* = 6.0, 10.0 Hz, 1H), 4.71 (q, *J* = 7.6, 9.6 Hz, 1H), 4.36 (q, *J* = 4.0, 9.6 Hz, 1H), 3.78 (d, *J* = 4.8 Hz, 1H), 2.05 (s, 3H). **<sup>13</sup>C NMR** (101 MHz, CDCl<sub>3</sub>) δ 160.2, 144.3, 130.4, 130.0, 127.4, 127.0, 125.2, 122.4, 120.8, 117.7, 110.2, 109.9, 78.0, 55.1, 17.4. **HRMS** (ESI) Calcd. for C<sub>15</sub>H<sub>16</sub>NO [M+H]<sup>+</sup>, 226.1232. Found: m/z 226.1233.

---

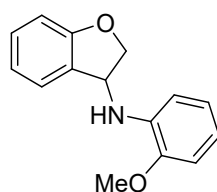

*N*-(2-methoxyphenyl)-2,3-dihydrobenzofuran-3-amine (**2g**). Colorless liquid. **<sup>1</sup>H NMR** (400 MHz, CDCl<sub>3</sub>) δ 7.39 (d, *J* = 7.2 Hz, 1H), 7.23 (t, *J* = 8.0 Hz, 1H), 6.96-6.85 (m, 3H), 6.78 (d, *J* = 8.0 Hz, 1H), 6.73 (t, *J* = 7.6 Hz, 1H), 6.65 (d, *J* = 7.6 Hz, 1H), 5.22 (q, *J* = 7.2 Hz, 1H), 4.75 (q, *J* = 7.2, 9.6 Hz, 1H), 4.55 (d, *J* = 6.0 Hz, 1H), 4.39 (q, *J* = 4.0, 9.6 Hz, 1H), 3.79 (s, 3H). **<sup>13</sup>C NMR** (101 MHz, CDCl<sub>3</sub>) δ 160.2, 147.0, 136.3, 130.0, 127.5, 125.4, 121.1, 120.8, 117.4, 110.2, 110.0, 109.7, 77.8, 55.2, 55.0. **HRMS** (ESI) Calcd. for C<sub>15</sub>H<sub>16</sub>NO<sub>2</sub> [M+H]<sup>+</sup>, 242.1181. Found: m/z 242.1182.

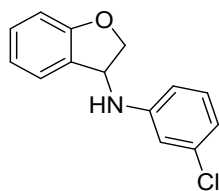

*N*-(3-chlorophenyl)-2,3-dihydrobenzofuran-3-amine (**2h**). Colorless liquid.  $^1\text{H}$  NMR (400 MHz,  $\text{CDCl}_3$ )  $\delta$  7.31 (d,  $J = 7.2$  Hz, 1H), 7.23 (t,  $J = 7.6$  Hz, 1H), 7.07 (t,  $J = 8.0$  Hz, 1H), 6.94-6.82 (m, 2H), 6.71 (d,  $J = 7.6$  Hz, 1H), 6.54 (s, 1H), 6.44 (dd,  $J = 1.6, 8.4$  Hz, 1H), 5.16-5.06 (m, 1H), 4.64 (q,  $J = 7.2, 9.6$  Hz, 1H), 4.33 (q,  $J = 3.6, 9.6$  Hz, 1H), 4.01 (d,  $J = 7.2$  Hz, 1H).  $^{13}\text{C}$  NMR (101 MHz,  $\text{CDCl}_3$ )  $\delta$  160.1, 147.4, 135.1, 130.4, 130.2, 126.8, 125.2, 120.9, 118.0, 112.7, 111.4, 110.3, 77.3, 55.1. HRMS (ESI) Calcd. for  $\text{C}_{14}\text{H}_{12}\text{ClNO}$   $[\text{M}+\text{H}]^+$ , 245.0607. Found:  $m/z$  245.0609.

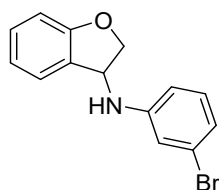

*N*-(3-bromophenyl)-2,3-dihydrobenzofuran-3-amine (**2i**). Colorless liquid.  $^1\text{H}$  NMR (400 MHz,  $\text{CDCl}_3$ )  $\delta$  7.34 (d,  $J = 7.6$  Hz, 1H), 7.25 (t,  $J = 8.0$  Hz, 1H), 7.03 (t,  $J = 8.0$  Hz, 1H), 6.96-6.82 (m, 3H), 6.74 (t,  $J = 2.0$  Hz, 1H), 6.51 (q,  $J = 5.6, 8.0$  Hz, 1H), 5.15 (q,  $J = 3.2, 6.8$  Hz, 1H), 4.68 (q,  $J = 7.2, 9.6$  Hz, 1H), 4.37 (q,  $J = 4.0, 9.6$  Hz, 1H), 4.01 (d,  $J = 6.0$  Hz, 1H).  $^{13}\text{C}$  NMR (101 MHz,  $\text{CDCl}_3$ )  $\delta$  160.1, 147.6, 130.7, 130.3, 126.8, 125.2, 123.4, 121.04, 121.0, 115.6, 111.8, 110.4, 77.4, 55.2. HRMS (ESI) Calcd. for  $\text{C}_{14}\text{H}_{13}\text{BrNO}$   $[\text{M}+\text{H}]^+$ , 290.0181. Found:  $m/z$  290.0184.

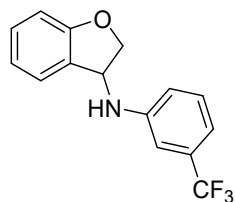

*N*-(3-(trifluoromethyl)phenyl)-2,3-dihydrobenzofuran-3-amine (**2j**). Colorless liquid.  $^1\text{H}$  NMR (400 MHz,  $\text{CDCl}_3$ )  $\delta$  7.33 (d,  $J = 7.6$  Hz, 1H), 7.30-7.20 (m, 2H), 7.00 (d,  $J = 7.6$  Hz,

1H), 6.96-6.84 (m, 2H), 6.79 (s, 1H), 6.74 (d,  $J = 8.4$  Hz, 1H), 5.19 (d,  $J = 3.6$  Hz, 1H), 4.68 (q,  $J = 7.6, 9.6$  Hz, 1H), 4.36 (q,  $J = 4.0, 10.0$  Hz, 1H), 4.15 (s, 1H).  $^{13}\text{C}$  NMR (101 MHz,  $\text{CDCl}_3$ )  $\delta$  160.1, 146.5, 131.9 (q,  $J = 31.6, 63.3$  Hz), 130.4, 129.9, 128.2, 126.7, 125.5, 125.2, 122.8, 121.0, 120.1, 116.0, 114.6 (q,  $J = 3.9, 7.7$  Hz), 110.4, 109.3 (q,  $J = 4.0, 7.8$  Hz), 77.3, 55.2. **HRMS** (ESI) Calcd. for  $\text{C}_{15}\text{H}_{13}\text{F}_3\text{NO}$   $[\text{M}+\text{H}]^+$ , 280.0949. Found:  $m/z$  280.0950.

---

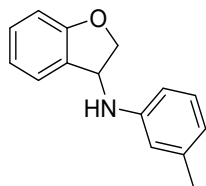

*N*-(*m*-tolyl)-2,3-dihydrobenzofuran-3-amine (**2k**). Colorless liquid.  $^1\text{H}$  NMR (400 MHz,  $\text{CDCl}_3$ )  $\delta$  7.33 (d,  $J = 7.2$  Hz, 1H), 7.22 (t,  $J = 7.6$  Hz, 1H), 7.08 (t,  $J = 8.0$  Hz, 1H), 6.94-6.82 (m, 2H), 6.59 (d,  $J = 7.6$  Hz, 1H), 6.47-6.35 (m, 2H), 5.17 (q,  $J = 4.0, 6.4$  Hz, 1H), 4.67 (q,  $J = 7.2, 9.6$  Hz, 1H), 4.37 (q,  $J = 4.0, 9.6$  Hz, 1H), 3.87 (s, 1H), 2.28 (s, 3H).  $^{13}\text{C}$  NMR (101 MHz,  $\text{CDCl}_3$ )  $\delta$  160.1, 146.4, 139.2, 130.0, 129.3, 127.4, 125.2, 120.8, 119.1, 114.0, 110.28, 110.2, 77.7, 55.3, 21.5. **HRMS** (ESI) Calcd. for  $\text{C}_{15}\text{H}_{16}\text{NO}$   $[\text{M}+\text{H}]^+$ , 226.1232. Found:  $m/z$  226.1233.

---

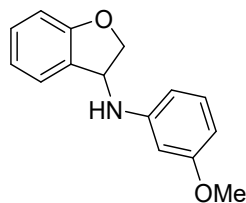

*N*-(3-methoxyphenyl)-2,3-dihydrobenzofuran-3-amine (**2l**). Colorless liquid.  $^1\text{H}$  NMR (400 MHz,  $\text{CDCl}_3$ )  $\delta$  7.26 (d,  $J = 7.6$  Hz, 1H), 7.21-7.12 (m, 1H), 7.03 (t,  $J = 8.0$  Hz, 1H), 6.88-6.75 (m, 2H), 6.26 (dd,  $J = 2.0, 8.4$  Hz, 1H), 6.15 (dd,  $J = 2.0, 8.4$  Hz, 1H), 6.08 (t,  $J = 2.0$  Hz, 1H), 5.09 (q,  $J = 4.0, 7.2$  Hz, 1H), 4.61 (q,  $J = 7.2, 9.6$  Hz, 1H), 4.32 (q,  $J = 4.0, 9.6$  Hz, 1H), 3.89 (s, 1H), 3.68 (s, 3H).  $^{13}\text{C}$  NMR (101 MHz,  $\text{CDCl}_3$ )  $\delta$  160.9, 160.1, 147.7, 130.2, 130.1, 127.2, 125.2, 120.9, 110.3, 106.2, 103.1, 99.4, 77.6, 55.3, 55.0. **HRMS** (ESI) Calcd. for  $\text{C}_{15}\text{H}_{16}\text{NO}_2$   $[\text{M}+\text{H}]^+$ , 242.1181. Found:  $m/z$  242.1184.

---



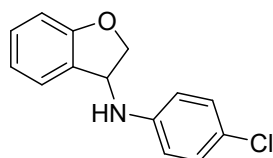

*N*-(4-chlorophenyl)-2,3-dihydrobenzofuran-3-amine (**2m**) White solid, m.p. (105-106 °C). **<sup>1</sup>H NMR** (400 MHz, CDCl<sub>3</sub>) δ 7.24 (d, *J* = 7.6 Hz, 1H), 7.19-7.11 (m, 1H), 7.09-7.00 (m, 2H), 6.85-6.74 (m, 2H), 6.46-6.37 (m, 2H), 5.02 (q, *J* = 3.6, 7.2 Hz, 1H), 4.55 (q, *J* = 7.2, 9.6 Hz, 1H), 4.25 (q, *J* = 4.0, 9.6 Hz, 1H), 3.86 (s, 1H). **<sup>13</sup>C NMR** (101 MHz, CDCl<sub>3</sub>) δ 160.4, 144.8, 130.2, 129.2, 126.9, 125.2, 122.6, 120.9, 114.2, 110.3, 77.2, 55.3. **HRMS** (ESI) Calcd. for C<sub>14</sub>H<sub>13</sub>ClNO [M+H]<sup>+</sup>, 246.0686. Found: m/z 246.0688.

---

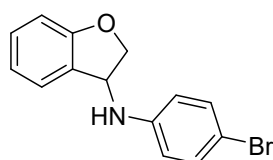

*N*-(4-bromophenyl)-2,3-dihydrobenzofuran-3-amine (**2n**). White solid, m.p. (108-109 °C). **<sup>1</sup>H NMR** (400 MHz, CDCl<sub>3</sub>) δ 7.31 (d, *J* = 7.2 Hz, 1H), 7.27-7.19 (m, 3H), 6.94-6.81 (m, 2H), 6.50-6.38 (m, 2H), 5.15-5.04 (m, 1H), 4.62 (q, *J* = 7.2, 9.6 Hz, 1H), 4.30 (q, *J* = 3.6, 9.6 Hz, 1H), 3.97 (d, *J* = 8.0 Hz, 1H). **<sup>13</sup>C NMR** (101 MHz, CDCl<sub>3</sub>) δ 159.9, 145.2, 132.0, 130.2, 126.8, 125.1, 120.9, 114.6, 110.3, 109.6, 77.1, 55.1. **HRMS** (ESI) Calcd. for C<sub>14</sub>H<sub>13</sub>BrNO [M+H]<sup>+</sup>, 290.0181. Found: m/z 290.0185.

---

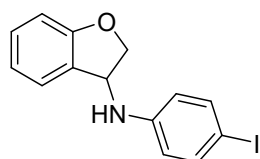

*N*-(4-iodophenyl)-2,3-dihydrobenzofuran-3-amine (**2o**). Yellow solid, m.p. (116-117 °C). **<sup>1</sup>H NMR** (400 MHz, CDCl<sub>3</sub>) δ 7.47 (d, *J* = 8.8 Hz, 2H), 7.35 (d, *J* = 7.6 Hz, 1H), 7.28-7.23 (m, 1H), 6.98-6.84 (m, 2H), 6.39 (d, *J* = 8.8 Hz, 2H), 5.21-5.09 (m, 1H), 4.74-4.62 (m, 1H), 4.44-4.30 (m, 1H), 3.99 (s, 1H). **<sup>13</sup>C NMR** (101 MHz, CDCl<sub>3</sub>) δ 160.1, 145.9, 138.0, 130.0, 126.9, 125.2, 121.0, 115.4, 110.4, 78.9, 55.2. **HRMS** (ESI) Calcd. for C<sub>14</sub>H<sub>13</sub>INO [M+H]<sup>+</sup>, 338.0042. Found: m/z 338.0044.

---

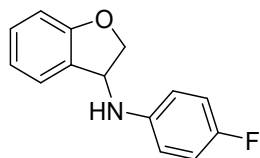

*N*-(4-fluorophenyl)-2,3-dihydrobenzofuran-3-amine (**2p**). Colorless liquid.  $^1\text{H NMR}$  (400 MHz,  $\text{CDCl}_3$ )  $\delta$  7.32 (d,  $J = 7.2$  Hz, 1H), 7.26-7.19 (m, 1H), 6.95-6.83 (m, 4H), 6.57-6.48 (m, 2H), 5.11 (q,  $J = 4.0, 6.8$  Hz, 1H), 4.67 (q,  $J = 7.2, 10.0$  Hz, 1H), 4.35 (q,  $J = 4.0, 9.6$  Hz, 1H), 3.82 (s, 1H).  $^{13}\text{C NMR}$  (101 MHz,  $\text{CDCl}_3$ )  $\delta$  160.0, 157.2 (d,  $J = 234.7$  Hz), 142.6 (d,  $J = 1.6$  Hz), 130.1, 127.2, 125.2, 120.8, 116.0 (d,  $J = 22.1$  Hz), 114.1 (d,  $J = 7.4$  Hz), 110.3, 77.3, 55.8. **HRMS** (ESI) Calcd. for  $\text{C}_{14}\text{H}_{13}\text{FNO}$   $[\text{M}+\text{H}]^+$ , 230.0981. Found:  $m/z$  230.0984.

---

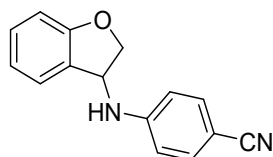

4-((2,3-dihydrobenzofuran-3-yl)amino)benzonitrile (**2q**). Colorless liquid.  $^1\text{H NMR}$  (400 MHz,  $\text{CDCl}_3$ )  $\delta$  7.47 (d,  $J = 8.8$  Hz, 2H), 7.36 (d,  $J = 7.2$  Hz, 1H), 7.32-7.24 (m, 1H), 6.95 (t,  $J = 7.2$  Hz, 1H), 6.89 (d,  $J = 8.4$  Hz, 1H), 6.61 (d,  $J = 8.8$  Hz, 2H), 5.27-5.18 (m, 1H), 4.72 (q,  $J = 7.2, 10.0$  Hz, 1H), 4.51 (d,  $J = 7.2$  Hz, 1H), 4.40 (q,  $J = 3.6, 9.6$  Hz, 1H).  $^{13}\text{C NMR}$  (101 MHz,  $\text{CDCl}_3$ )  $\delta$  160.2, 149.4, 133.9, 130.6, 126.0, 125.1, 121.2, 119.9, 112.6, 110.6, 101.0, 77.0, 54.8. **HRMS** (ESI) Calcd. for  $\text{C}_{15}\text{H}_{13}\text{N}_2\text{O}$   $[\text{M}+\text{H}]^+$ , 237.1028. Found:  $m/z$  237.1030.

---

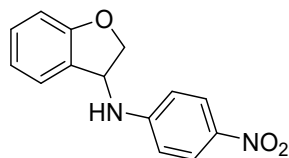

*N*-(4-nitrophenyl)-2,3-dihydrobenzofuran-3-amine (**2r**). Yellow liquid.  $^1\text{H NMR}$  (400 MHz,  $\text{CDCl}_3$ )  $\delta$  8.14 (d,  $J = 8.8$  Hz, 2H), 7.38 (d,  $J = 7.2$  Hz, 1H), 7.30 (t,  $J = 8.0$  Hz, 1H), 6.97 (t,  $J = 7.6$  Hz, 1H), 6.91 (d,  $J = 8.0$  Hz, 1H), 6.59 (d,  $J = 9.2$  Hz, 2H), 5.33-5.24 (m, 1H), 4.80-4.67 (m, 2H), 4.41 (q,  $J = 3.6, 9.6$  Hz, 1H).  $^{13}\text{C NMR}$  (101 MHz,  $\text{CDCl}_3$ )  $\delta$  160.2, 151.3, 138.9, 130.8, 126.5, 125.7, 125.2, 121.3, 111.5, 110.7, 77.0, 55.1. **HRMS** (ESI) Calcd. for  $\text{C}_{14}\text{H}_{13}\text{N}_2\text{O}_3$   $[\text{M}+\text{H}]^+$ , 257.0926. Found:  $m/z$  257.0927.

---

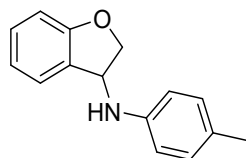

*N*-(*p*-tolyl)-2,3-dihydrobenzofuran-3-amine (**2s**). Colorless liquid.  $^1\text{H NMR}$  (400 MHz,  $\text{CDCl}_3$ )  $\delta$  7.31 (d,  $J = 7.2$  Hz, 1H), 7.23-7.17 (m, 1H), 7.00 (d,  $J = 8.0$  Hz, 2H), 6.90-6.81 (m, 2H), 6.48 (d,  $J = 8.4$  Hz, 2H), 5.11 (q,  $J = 4.0, 7.2$  Hz, 1H), 4.62 (q,  $J = 7.6, 9.6$  Hz, 1H), 4.33 (q,  $J = 4.0, 9.6$  Hz, 1H), 3.78 (s, 1H), 2.23 (s, 3H).  $^{13}\text{C NMR}$  (101 MHz,  $\text{CDCl}_3$ )  $\delta$  160.0, 144.0, 129.9, 129.8, 127.4, 127.3, 125.2, 120.7, 113.3, 110.1, 77.5, 55.4, 20.3. **HRMS** (ESI) Calcd. for  $\text{C}_{15}\text{H}_{16}\text{NO}$   $[\text{M}+\text{H}]^+$ , 226.1232. Found:  $m/z$  226.1234.

---

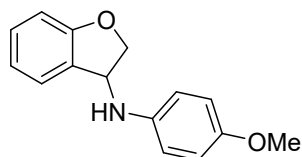

*N*-(4-methoxyphenyl)-2,3-dihydrobenzofuran-3-amine (**2t**). White solid, m.p. (50-51  $^\circ\text{C}$ ).  $^1\text{H NMR}$  (400 MHz,  $\text{CDCl}_3$ )  $\delta$  7.30 (d,  $J = 7.2$  Hz, 1H), 7.24-7.17 (m, 1H), 6.91-6.81 (m, 2H), 6.80-6.74 (m, 2H), 6.58-6.51 (m, 2H), 5.09 (q,  $J = 4.0, 7.2$  Hz, 1H), 4.63 (q,  $J = 7.2, 9.6$  Hz, 1H), 4.34 (q,  $J = 4.0, 9.6$  Hz, 1H), 3.71 (s, 3H), 3.66 (s, 1H).  $^{13}\text{C NMR}$  (101 MHz,  $\text{CDCl}_3$ )  $\delta$  159.9, 152.4, 140.3, 129.8, 127.5, 125.1, 120.6, 114.8, 114.6, 110.1, 77.3, 56.0, 55.5. **HRMS** (ESI) Calcd. for  $\text{C}_{15}\text{H}_{16}\text{NO}_2$   $[\text{M}+\text{H}]^+$ , 242.1181. Found:  $m/z$  242.1184.

---

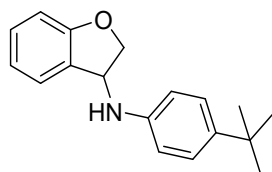

*N*-(4-(*tert*-butyl)phenyl)-2,3-dihydrobenzofuran-3-amine (**2u**). Colorless liquid.  $^1\text{H NMR}$  (400 MHz,  $\text{CDCl}_3$ )  $\delta$  7.34 (d,  $J = 7.2$  Hz, 1H), 7.29-7.18 (m, 3H), 6.95-6.82 (m, 2H), 6.57 (d,  $J = 8.4$  Hz, 2H), 5.16 (q,  $J = 4.0, 7.2$  Hz, 1H), 4.69 (q,  $J = 7.2, 9.6$  Hz, 1H), 4.40 (q,  $J = 4.0, 9.2$  Hz, 1H), 3.87 (s, 1H), 1.29 (s, 9H).  $^{13}\text{C NMR}$  (101 MHz,  $\text{CDCl}_3$ )  $\delta$  160.1, 143.9, 140.9, 130.0, 127.4, 126.2, 125.2, 120.8, 112.7, 110.2, 77.8, 55.4, 33.8, 31.4. **HRMS** (ESI) Calcd. for  $\text{C}_{18}\text{H}_{22}\text{NO}$   $[\text{M}+\text{H}]^+$ , 268.1701. Found:  $m/z$  268.1706.

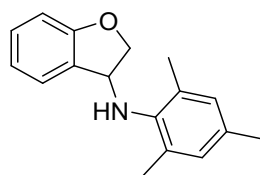

*N*-mesityl-2,3-dihydrobenzofuran-3-amine (**4a**). Colorless liquid.  $^1\text{H NMR}$  (400 MHz,  $\text{CDCl}_3$ )  $\delta$  7.19 (t,  $J = 8.0$  Hz, 1H), 7.05 (d,  $J = 7.2$  Hz, 1H), 6.89-6.77 (m, 4H), 4.85 (q,  $J = 3.2, 7.2$  Hz, 1H), 4.51 (q,  $J = 9.6, 10.0$  Hz, 1H), 4.39 (q,  $J = 3.2, 9.6$  Hz, 1H), 3.21 (s, 1H), 2.23 (s, 3H), 2.15 (s, 6H).  $^{13}\text{C NMR}$  (101 MHz,  $\text{CDCl}_3$ )  $\delta$  159.7, 140.9, 129.6, 129.59, 129.5, 128.8, 125.2, 120.6, 110.2, 77.2, 58.9, 20.5, 18.5. **HRMS** (ESI) Calcd. for  $\text{C}_{17}\text{H}_{20}\text{NO}$   $[\text{M}+\text{H}]^+$ , 254.1545. Found:  $m/z$  254.1547.

---

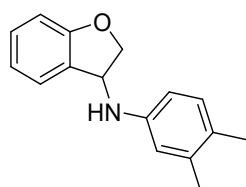

*N*-(3,4-dimethylphenyl)-2,3-dihydrobenzofuran-3-amine (**4b**). Colorless liquid.  $^1\text{H NMR}$  (400 MHz,  $\text{CDCl}_3$ )  $\delta$  7.24 (d,  $J = 7.6$  Hz, 1H), 7.17-7.07 (m, 1H), 6.85 (d,  $J = 8.0$  Hz, 1H), 6.83-6.71 (m, 2H), 6.32 (s, 1H), 6.29 (dd,  $J = 2.0, 8.0$  Hz, 1H), 5.06 (q,  $J = 4.0, 7.2$  Hz, 1H), 4.57 (q,  $J = 3.2, 9.6$  Hz, 1H), 4.26 (q,  $J = 4.0, 9.6$  Hz, 1H), 3.65 (s, 1H), 2.10 (s, 3H), 2.07 (s, 3H).  $^{13}\text{C NMR}$  (101 MHz,  $\text{CDCl}_3$ )  $\delta$  160.1, 144.5, 137.6, 130.4, 130.0, 127.6, 126.3, 125.2, 120.8, 115.2, 110.6, 110.2, 77.7, 55.6, 20.0, 18.6. **HRMS** (ESI) Calcd. for  $\text{C}_{16}\text{H}_{18}\text{NO}$   $[\text{M}+\text{H}]^+$ , 240.1388. Found:  $m/z$  240.1390.

---

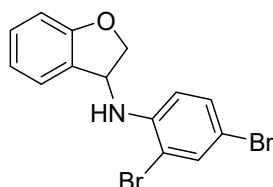

*N*-(2,4-dibromophenyl)-2,3-dihydrobenzofuran-3-amine (**4c**). White solid, m.p. (89-90 °C).  $^1\text{H NMR}$  (400 MHz,  $\text{CDCl}_3$ )  $\delta$  7.58 (s, 1H), 7.37 (t,  $J = 7.2$  Hz, 1H), 7.35-7.26 (m, 2H), 7.02-6.85 (m, 2H), 6.55 (d,  $J = 8.4$  Hz, 1H), 5.19 (q,  $J = 7.2$  Hz, 1H), 4.74 (q,  $J = 8.0, 8.8$  Hz, 1H),

4.63 (s, 1H), 4.41-4.30 (m, 1H).  $^{13}\text{C}$  NMR (101 MHz,  $\text{CDCl}_3$ )  $\delta$  160.2, 142.6, 134.8, 131.2, 130.5, 126.4, 125.2, 121.2, 112.4, 110.5, 110.4, 109.1, 77.3, 55.5. HRMS (ESI) Calcd. for  $\text{C}_{14}\text{H}_{12}\text{Br}_2\text{NO}$   $[\text{M}+\text{H}]^+$ , 367.9286. Found:  $m/z$  367.9287.

---

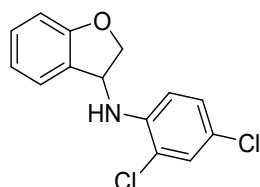

*N*-(2,4-dichlorophenyl)-2,3-dihydrobenzofuran-3-amine (**4d**). White solid, m.p. (66-67 °C).  $^1\text{H}$  NMR (400 MHz,  $\text{CDCl}_3$ )  $\delta$  7.37 (d,  $J = 7.2$  Hz, 1H), 7.32-7.22 (m, 2H), 7.14 (dd,  $J = 3.2, 8.8$  Hz, 1H), 6.95 (t,  $J = 7.6$  Hz, 1H), 6.91 (d,  $J = 8.4$  Hz, 1H), 5.25-5.15 (m, 1H), 4.73 (q,  $J = 7.6, 9.6$  Hz, 1H), 4.58 (d,  $J = 6.8$  Hz, 1H), 4.37 (q,  $J = 4.0, 9.6$  Hz, 1H).  $^{13}\text{C}$  NMR (101 MHz,  $\text{CDCl}_3$ )  $\delta$  160.2, 141.2, 130.4, 129.2, 127.7, 126.4, 125.2, 122.1, 120.0, 111.9, 110.5, 77.3, 55.4. HRMS (ESI) Calcd. for  $\text{C}_{14}\text{H}_{12}\text{Cl}_2\text{NO}$   $[\text{M}+\text{H}]^+$ , 280.0296. Found:  $m/z$  280.0297.

---

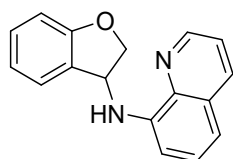

*N*-(2,3-dihydrobenzofuran-3-yl)quinolin-8-amine (**4e**). Brown liquid.  $^1\text{H}$  NMR (400 MHz,  $\text{CDCl}_3$ )  $\delta$  8.65 (d,  $J = 3.6$  Hz, 1H), 8.06 (d,  $J = 8.4$  Hz, 1H), 7.51-7.33 (m, 3H), 7.26 (t,  $J = 8.4$  Hz, 1H), 7.13 (d,  $J = 8.0$  Hz, 1H), 7.01-6.85 (m, 2H), 6.74 (d,  $J = 7.2$  Hz, 1H), 6.48 (s, 1H), 5.42 (d,  $J = 4.0$  Hz, 1H), 4.82 (t,  $J = 8.0$  Hz, 1H), 4.52 (q,  $J = 4.0, 9.6$  Hz, 1H).  $^{13}\text{C}$  NMR (101 MHz,  $\text{CDCl}_3$ )  $\delta$  160.3, 147.1, 143.1, 138.2, 135.9, 130.0, 128.7, 127.4, 127.2, 125.5, 121.6, 120.9, 114.9, 110.3, 104.9, 77.6, 54.9. HRMS (ESI) Calcd. for  $\text{C}_{17}\text{H}_{15}\text{N}_2\text{O}$   $[\text{M}+\text{H}]^+$ , 263.1184. Found:  $m/z$  263.1187.

---

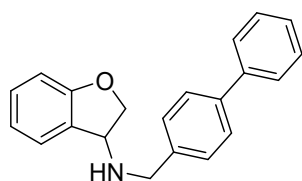

*N*-([1,1'-biphenyl]-4-ylmethyl)-2,3-dihydrobenzofuran-3-amine (**4f**). White solid, m.p. (48-49 °C). <sup>1</sup>H NMR (400 MHz, CDCl<sub>3</sub>) δ 7.56 (t, *J* = 8.8 Hz, 4H), 7.42 (t, *J* = 8.0 Hz, 4H), 7.38-7.29 (m, 2H), 7.25-7.17 (m, 1H), 6.91 (t, *J* = 7.2 Hz, 1H), 6.86 (d, *J* = 8.0 Hz, 1H), 4.95-4.48 (m, 2H), 4.47-4.36 (m, 1H), 3.91 (q, *J* = 13.2, 30.4 Hz, 2H). <sup>13</sup>C NMR (101 MHz, CDCl<sub>3</sub>) δ 160.0, 140.8, 140.1, 138.9, 129.5, 128.7, 128.6, 128.5, 127.2, 127.0, 120.5, 110.2, 77.2, 59.3, 50.4. **HRMS** (ESI) Calcd. for C<sub>21</sub>H<sub>20</sub>NO [M+H]<sup>+</sup>, 302.1545. Found: m/z 302.1548.

---

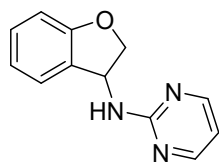

*N*-(2,3-dihydrobenzofuran-3-yl)pyrimidin-2-amine (**4g**). White solid, m.p. (157-158 °C). <sup>1</sup>H NMR (400 MHz, CDCl<sub>3</sub>) δ 8.05 (s, 2H), 7.37 (d, *J* = 7.2 Hz, 1H), 7.28-7.20 (m, 1H), 6.91 (dd, *J* = 8.4, 16.0 Hz, 2H), 6.50 (t, *J* = 4.8 Hz, 2H), 5.75-5.62 (m, 1H), 4.79 (q, *J* = 7.6, 9.6 Hz, 1H), 4.40 (q, *J* = 4.0, 9.6 Hz, 1H). <sup>13</sup>C NMR (101 MHz, CDCl<sub>3</sub>) δ 161.4, 160.5, 157.9, 130.0, 126.8, 125.5, 120.9, 111.1, 110.3, 78.4, 53.3. **HRMS** (ESI) Calcd. for C<sub>12</sub>H<sub>12</sub>N<sub>3</sub>O [M+H]<sup>+</sup>, 214.0980. Found: m/z 214.0984.

---

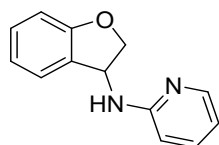

*N*-(2,3-dihydrobenzofuran-3-yl)pyridin-2-amine (**4h**). White solid, m.p. (168-169 °C). <sup>1</sup>H NMR (400 MHz, CDCl<sub>3</sub>) δ 8.13 (d, *J* = 4.4 Hz, 1H), 7.49-7.33 (m, 2H), 7.30-7.20 (m, 1H), 6.97-6.83 (m, 2H), 6.63 (q, *J* = 4.2, 6.4 Hz, 1H), 6.40 (d, *J* = 8.0 Hz, 1H), 5.70-5.57 (m, 1H), 4.79 (q, *J* = 7.2, 9.6 Hz, 1H), 4.67 (d, *J* = 6.8 Hz, 1H), 4.41 (q, *J* = 4.0, 9.6 Hz, 1H). <sup>13</sup>C NMR (101 MHz, CDCl<sub>3</sub>) δ 160.4, 157.2, 148.0, 137.3, 130.0, 127.3, 125.2, 120.8, 113.6, 110.3, 108.4, 78.5, 53.5. **HRMS** (ESI) Calcd. for C<sub>13</sub>H<sub>13</sub>N<sub>2</sub>O [M+H]<sup>+</sup>, 213.1028. Found: m/z 213.1029.

---

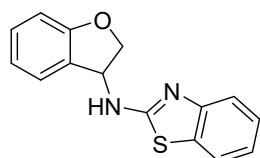

*N*-(2,3-dihydrobenzofuran-3-yl)benzo[d]thiazol-2-amine (**4i**). White solid, m.p. (174-175 °C). <sup>1</sup>H NMR (400 MHz, CDCl<sub>3</sub>) δ 7.57 (dd, *J* = 8.0, 12.8 Hz, 2H), 7.43 (d, *J* = 7.6 Hz, 1H), 7.36-7.22 (m, 2H), 6.98-6.85 (m, 2H), 5.68 (q, *J* = 3.6, 7.6 Hz, 1H), 5.52 (s, 1H), 4.80 (q, *J* = 7.2, 10.0 Hz, 1H), 4.56 (q, *J* = 3.6, 10.4 Hz, 1H), 5.68 (q, *J* = 3.6, 7.6 Hz, 1H), 5.52 (s, 1H), 4.80 (q, *J* = 7.2, 10.4 Hz, 1H), 4.56 (q, *J* = 3.6, 10.4 Hz, 1H). <sup>13</sup>C NMR (101 MHz, CDCl<sub>3</sub>) δ 165.0, 160.4, 152.2, 130.6, 126.5, 125.7, 125.5, 122.1, 121.1, 120.8, 119.4, 110.5, 77.7, 56.7. HRMS (ESI) Calcd. for C<sub>15</sub>H<sub>13</sub>N<sub>2</sub>OS [M+H]<sup>+</sup>, 269.0749. Found: m/z 269.0750.

---

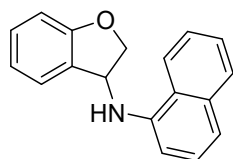

*N*-(naphthalen-1-yl)-2,3-dihydrobenzofuran-3-amine (**4j**). White solid, m.p. (131-132 °C). <sup>1</sup>H NMR (400 MHz, CDCl<sub>3</sub>) δ 7.80 (d, *J* = 8.0 Hz, 1H), 7.70 (d, *J* = 8.4 Hz, 1H), 7.44 (t, *J* = 7.6 Hz, 2H), 7.41-7.33 (m, 2H), 7.29 (t, *J* = 7.6 Hz, 2H), 7.00-6.89 (m, 2H), 6.61 (d, *J* = 7.2 Hz, 1H), 5.37 (q, *J* = 4.0, 10.8 Hz, 1H), 4.82 (q, *J* = 7.6, 9.6 Hz, 1H), 4.62 (s, 1H), 4.50 (q, *J* = 4.0, 9.6 Hz, 1H). <sup>13</sup>C NMR (101 MHz, CDCl<sub>3</sub>) δ 160.4, 141.6, 134.4, 130.3, 128.7, 127.3, 126.3, 126.0, 125.4, 125.0, 123.4, 121.0, 119.9, 118.4, 110.4, 77.8, 55.5. HRMS (ESI) Calcd. for C<sub>18</sub>H<sub>16</sub>NO [M+H]<sup>+</sup>, 262.1232. Found: m/z 262.1235.

---

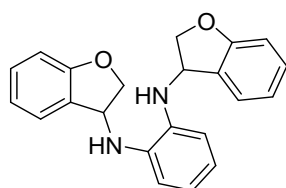

*N*<sup>1</sup>,*N*<sup>2</sup>-bis(2,3-dihydrobenzofuran-3-yl)benzene-1,2-diamine (**4k**). Yellow liquid. <sup>1</sup>H NMR (400 MHz, CDCl<sub>3</sub>) δ 7.29 (d, *J* = 7.6 Hz, 2H), 7.21 (t, *J* = 8.0 Hz, 2H), 6.92-6.81 (m, 6H), 6.72-6.65 (m, 2H), 5.12 (s, 2H), 4.74-4.65 (m, 2H), 4.37 (q, *J* = 4.0, 9.6 Hz, 2H), 3.58 (s, 2H). <sup>13</sup>C NMR (101 MHz, CDCl<sub>3</sub>) δ 160.2, 135.8, 130.0, 127.5, 127.4, 125.4, 125.3, 120.9, 120.1, 113.2, 113.1, 110.2, 77.6, 77.5, 55.58, 55.5. HRMS (ESI) Calcd. for C<sub>22</sub>H<sub>21</sub>N<sub>2</sub>O<sub>2</sub> [M+H]<sup>+</sup>, 345.1603. Found: m/z 345.1605.

---

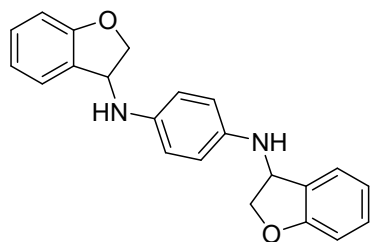

*N',N'*-bis(2,3-dihydrobenzofuran-3-yl)benzene-1,4-diamine (**4l**). Yellow liquid.  $^1\text{H}$  NMR (400 MHz,  $\text{CDCl}_3$ )  $\delta$  7.35 (d,  $J = 7.2$  Hz, 2H), 7.24 (t,  $J = 6.0$  Hz, 2H), 6.97-6.82 (m, 4H), 6.59 (s, 4H), 5.15 (q,  $J = 4.0, 6.8$  Hz, 2H), 4.68 (t,  $J = 7.6$  Hz, 2H), 4.42 (q,  $J = 3.6, 9.6$  Hz, 2H), 3.59 (s, 2H).  $^{13}\text{C}$  NMR (101 MHz,  $\text{CDCl}_3$ )  $\delta$  160.1, 139.3, 130.0, 127.7, 125.2, 120.8, 115.5, 110.3, 77.5, 56.5. HRMS (ESI) Calcd. for  $\text{C}_{22}\text{H}_{21}\text{N}_2\text{O}_2$   $[\text{M}+\text{H}]^+$ , 345.1603. Found:  $m/z$  345.1604.

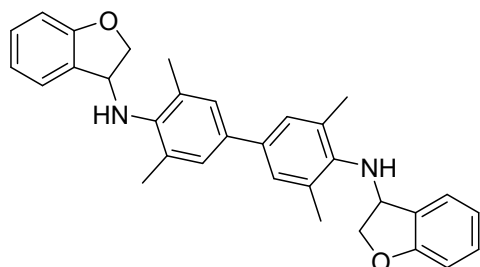

*N',N'*-bis(2,3-dihydrobenzofuran-3-yl)-3,3',5,5'-tetramethyl-[1,1'-biphenyl]-4,4'-diamine (**4m**). Colorless liquid.  $^1\text{H}$  NMR (400 MHz,  $\text{CDCl}_3$ )  $\delta$  7.27-7.17 (m, 6H), 7.09 (d,  $J = 7.6$  Hz, 2H), 6.92-6.79 (m, 4H), 4.95 (q,  $J = 3.2, 7.6$  Hz, 2H), 4.56 (t,  $J = 9.6$  Hz, 2H), 4.44 (q,  $J = 3.2, 10.0$  Hz, 2H), 3.39 (s, 2H), 2.25 (s, 12H).  $^{13}\text{C}$  NMR (101 MHz,  $\text{CDCl}_3$ )  $\delta$  159.7, 142.6, 134.8, 129.7, 128.7, 127.2, 125.2, 120.7, 110.3, 77.4, 58.9, 18.9. HRMS (ESI) Calcd. for  $\text{C}_{32}\text{H}_{33}\text{N}_2\text{O}_2$   $[\text{M}+\text{H}]^+$ , 477.2542. Found:  $m/z$  477.2545.

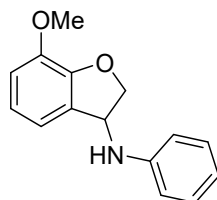

7-methoxy-*N*-phenyl-2,3-dihydrobenzofuran-3-amine (**6a**). White solid, m.p. (80-81  $^{\circ}\text{C}$ ).  $^1\text{H}$  NMR (400 MHz,  $\text{CDCl}_3$ )  $\delta$  7.23-7.16 (m, 2H), 6.95 (dd,  $J = 1.0, 7.2$  Hz, 1H), 6.90-6.81 (m, 2H), 6.76 (t,  $J = 7.2$  Hz, 1H), 6.59 (d,  $J = 7.6$  Hz, 2H), 5.21 (q,  $J = 4.0, 6.4$  Hz, 1H), 4.75 (q,  $J = 7.2, 10.0$  Hz, 1H), 4.45 (q,  $J = 4.0, 9.6$  Hz, 1H), 3.96 (s, 1H), 3.87 (s, 3H).  $^{13}\text{C}$  NMR (101 MHz,



CDCl<sub>3</sub>)  $\delta$  148.5, 146.2, 144.8, 129.3, 128.3, 121.5, 118.1, 116.9, 113.0, 112.3, 78.1, 55.8, 55.7.

**HRMS** (ESI) Calcd. for C<sub>15</sub>H<sub>16</sub>NO<sub>2</sub> [M+H]<sup>+</sup>, 242.1181. Found: m/z 242.1184.

---

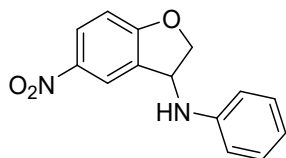

5-nitro-*N*-phenyl-2,3-dihydrobenzofuran-3-amine (**6b**). Yellow liquid. **<sup>1</sup>H NMR** (400 MHz, CDCl<sub>3</sub>)  $\delta$  8.26 (s, 1H), 8.22 (dd, *J* = 2.0, 8.8 Hz, 1H), 7.24 (t, *J* = 6.8 Hz, 2H), 6.94 (d, *J* = 8.8 Hz, 1H), 6.82 (t, *J* = 7.2 Hz, 1H), 6.65 (d, *J* = 8.0 Hz, 2H), 5.31 (q, *J* = 7.2, 9.6 Hz, 1H), 4.91 (q, *J* = 8.0, 10.0 Hz, 1H), 3.99 (d, *J* = 7.2 Hz, 1H). **<sup>13</sup>C NMR** (101 MHz, CDCl<sub>3</sub>)  $\delta$  165.4, 145.6, 142.2, 129.6, 128.9, 127.3, 121.9, 119.0, 113.3, 110.4, 79.6, 54.5. **HRMS** (ESI) Calcd. for C<sub>14</sub>H<sub>13</sub>N<sub>2</sub>O<sub>3</sub> [M+H]<sup>+</sup>, 257.0926. Found: m/z 257.0929.

---

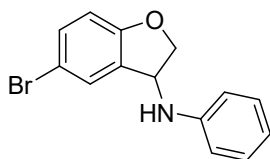

5-bromo-*N*-phenyl-2,3-dihydrobenzofuran-3-amine (**6c**). Colorless liquid. **<sup>1</sup>H NMR** (400 MHz, CDCl<sub>3</sub>)  $\delta$  7.44 (s, 1H), 7.34 (d, *J* = 8.4 Hz, 1H), 7.21 (t, *J* = 7.6 Hz, 2H), 6.83-6.71 (m, 2H), 6.62 (d, *J* = 7.6 Hz, 2H), 5.19 (s, 1H), 4.72 (t, *J* = 7.6 Hz, 1H), 4.45-4.34 (m, 1H), 3.92 (s, 1H). **<sup>13</sup>C NMR** (101 MHz, CDCl<sub>3</sub>)  $\delta$  159.3, 146.0, 132.9, 129.7, 129.5, 128.2, 118.5, 113.2, 112.4, 111.9, 78.1, 55.2. **HRMS** (ESI) Calcd. for C<sub>14</sub>H<sub>13</sub>BrNO [M+H]<sup>+</sup>, 290.0181. Found: m/z 290.0182.

---

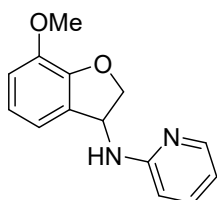

*N*-(7-methoxy-2,3-dihydrobenzofuran-3-yl)pyridin-2-amine (**6d**). White solid, m.p. (85-86 °C). **<sup>1</sup>H NMR** (400 MHz, CDCl<sub>3</sub>)  $\delta$  8.12 (dd, *J* = 0.8, 4.8 Hz, 1H), 7.47-7.36 (m, 1H), 6.99 (dd, *J* = 0.4, 7.2 Hz, 1H), 6.92-6.81 (m, 2H), 6.67-6.59 (m, 1H), 6.40 (d, *J* = 8.4 Hz, 1H), 5.71-5.60 (m, 1H), 4.86 (q, *J* = 3.6, 9.6 Hz, 1H), 4.72 (d, *J* = 7.2 Hz, 1H), 4.46 (q, *J* = 4.0, 10.0 Hz,

1H), 3.89 (s, 3H). <sup>13</sup>C NMR (101 MHz, CDCl<sub>3</sub>) δ 157.1, 148.8, 147.9, 144.8, 137.3, 128.2, 121.5, 117.0, 113.5, 112.3, 108.4, 79.1, 55.9, 54.0. **HRMS** (ESI) Calcd. for C<sub>14</sub>H<sub>15</sub>N<sub>2</sub>O<sub>2</sub> [M+H]<sup>+</sup>, 243.1134. Found: m/z 243.1136.

---

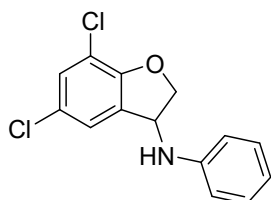

5,7-dichloro-*N*-phenyl-2,3-dihydrobenzofuran-3-amine (**6e**). Colorless liquid. <sup>1</sup>H NMR (400 MHz, CDCl<sub>3</sub>) δ 7.19 (t, *J* = 9.2 Hz, 4H), 6.78 (t, *J* = 7.6 Hz, 1H), 6.59 (d, *J* = 8.4 Hz, 2H), 5.22 (s, 1H), 4.79 (q, *J* = 3.6, 9.6 Hz, 1H), 4.43 (q, *J* = 4.4, 9.6 Hz, 1H), 3.91 (s, 1H). <sup>13</sup>C NMR (101 MHz, CDCl<sub>3</sub>) δ 154.8, 145.6, 130.3, 129.7, 129.5, 125.8, 123.7, 118.8, 116.2, 113.3, 78.6, 55.8. **HRMS** (ESI) Calcd. for C<sub>14</sub>H<sub>12</sub>Cl<sub>2</sub>NO [M+H]<sup>+</sup>, 280.0296. Found: m/z 280.0298.

---

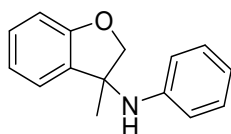

3-methyl-*N*-phenyl-2,3-dihydrobenzofuran-3-amine (**6f**). Colorless liquid. <sup>1</sup>H NMR (400 MHz, CDCl<sub>3</sub>) δ 7.27-7.16 (m, 2H), 7.07 (t, *J* = 7.6 Hz, 2H), 6.94-6.83 (m, 2H), 6.68 (t, *J* = 7.2 Hz, 1H), 6.45 (d, *J* = 8.0 Hz, 2H), 4.80 (d, *J* = 5.2 Hz, 1H), 4.30 (d, *J* = 9.2 Hz, 1H), 4.00 (s, 1H), 1.71 (s, 3H). <sup>13</sup>C NMR (101 MHz, CDCl<sub>3</sub>) δ 159.4, 144.9, 132.0, 129.4, 129.1, 123.0, 120.9, 118.0, 114.9, 110.2, 79.2, 62.0, 29.2. **HRMS** (ESI) Calcd. for C<sub>15</sub>H<sub>16</sub>NO [M+H]<sup>+</sup>, 226.1232. Found: m/z 226.1233.

---

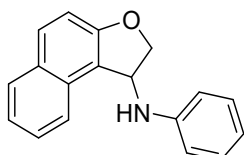

*N*-phenyl-1,2-dihydronaphtho[2,1-*b*]furan-1-amine (**6g**). White solid, m.p. (127-128 °C). <sup>1</sup>H NMR (400 MHz, CDCl<sub>3</sub>) δ 7.89-7.73 (m, 3H), 7.45 (t, *J* = 3.6 Hz, 1H), 7.33 (t, *J* = 7.6 Hz, 1H), 7.23 (t, *J* = 8.0 Hz, 2H), 7.17 (d, *J* = 8.8 Hz, 1H), 6.78 (t, *J* = 7.2 Hz, 1H), 6.64 (d, *J* = 8.0 Hz,

2H), 5.57 (s, 1H), 4.82 (t,  $J = 7.2$  Hz, 1H), 4.65 (q,  $J = 2.8, 9.6$  Hz, 1H), 4.06 (s, 1H).  $^{13}\text{C}$  NMR (101 MHz,  $\text{CDCl}_3$ )  $\delta$  158.4, 146.5, 131.4, 130.6, 129.5, 128.8, 127.3, 123.3, 122.3, 118.0, 117.9, 113.0, 112.5, 78.7, 55.1. **HRMS** (ESI) Calcd. for  $\text{C}_{18}\text{H}_{16}\text{NO}$   $[\text{M}+\text{H}]^+$ , 262.1232. Found:  $m/z$  262.1235.

---

### 3. NMR spectra copies

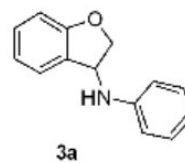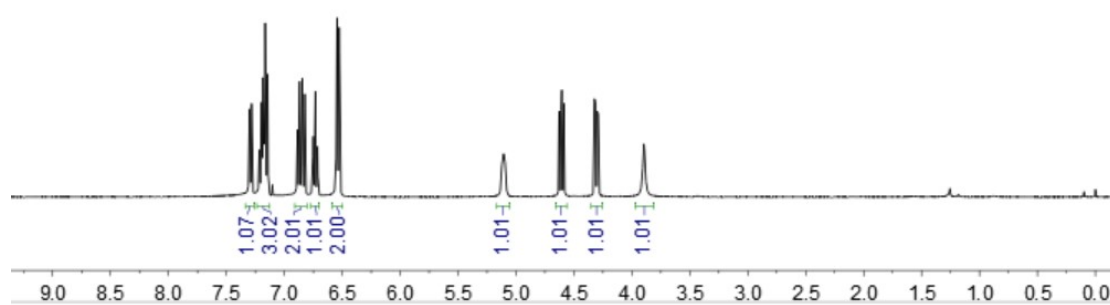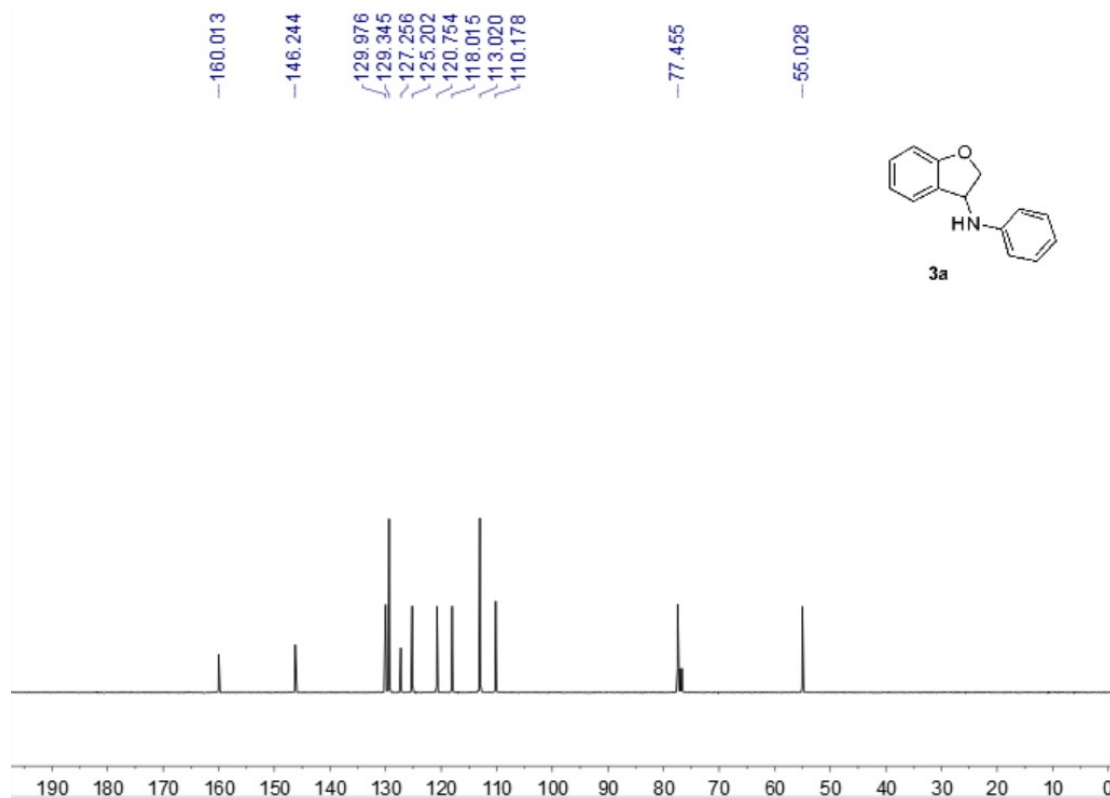

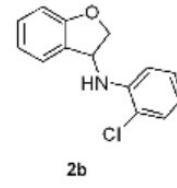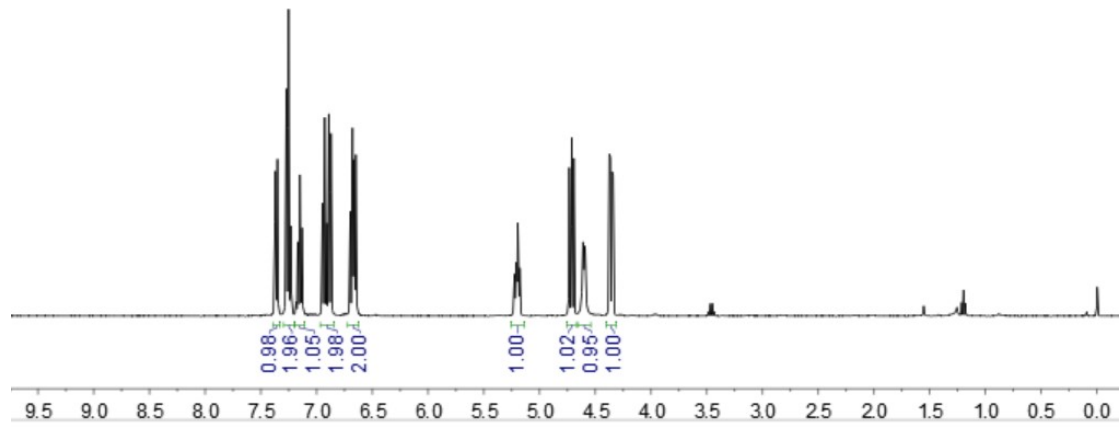

160.173  
142.379  
130.266  
129.539  
127.777  
126.746  
125.216  
121.041  
119.524  
118.073  
111.306  
110.372  
77.546  
55.159

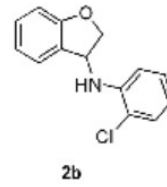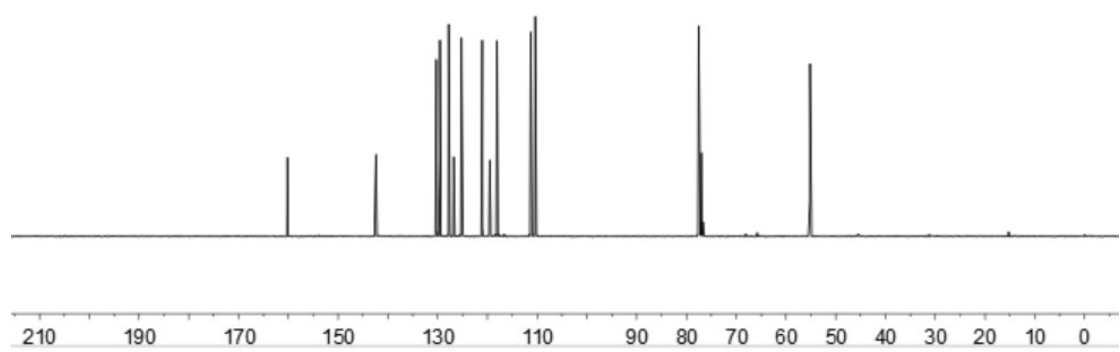

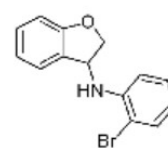

**2c**

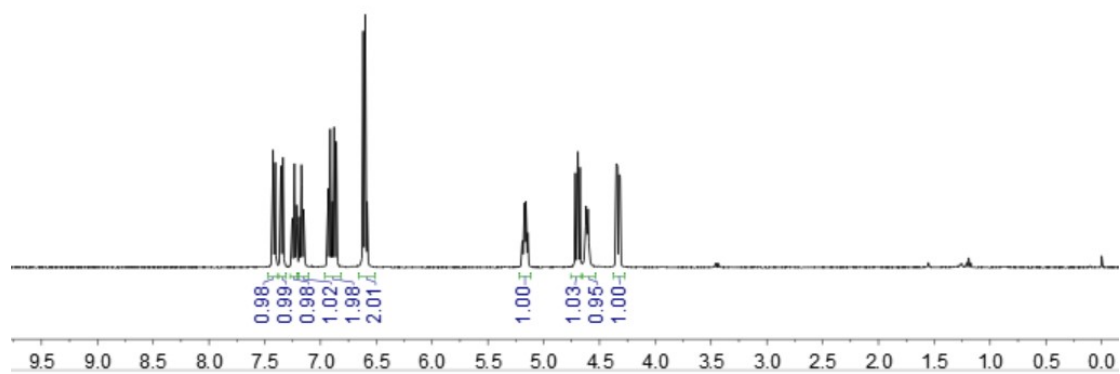

Chemical shift values (ppm) for the <sup>13</sup>C NMR spectrum:

- 160.108
- 143.327
- 132.764
- 130.207
- 128.426
- 126.684
- 125.133
- 121.003
- 118.555
- 111.361
- 110.315
- 109.969
- 77.476
- 55.306

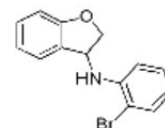

**2c**

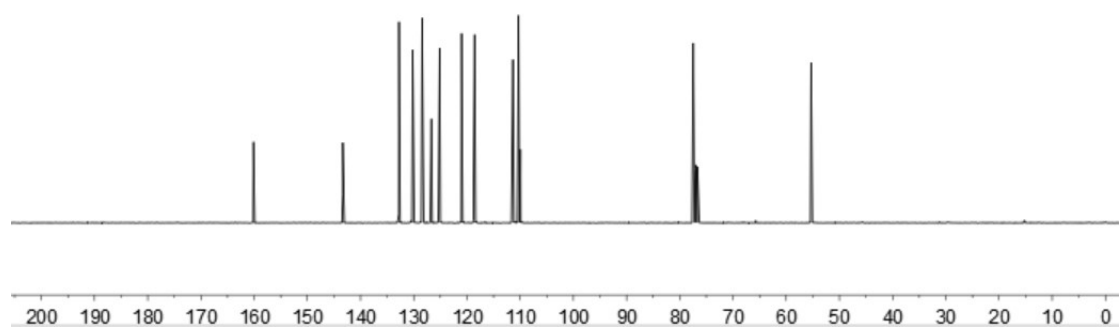

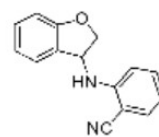

2d

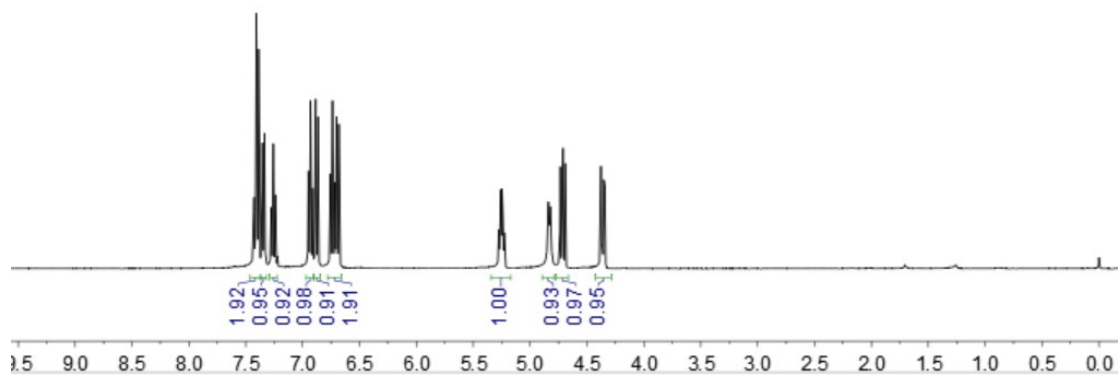

- 160.059
- 148.285
- 134.202
- 133.126
- 130.499
- 125.673
- 125.100
- 121.160
- 117.385
- 117.316
- 110.784
- 110.397
- 96.415
- 76.918
- 54.860

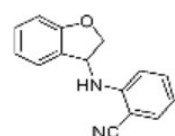

2d

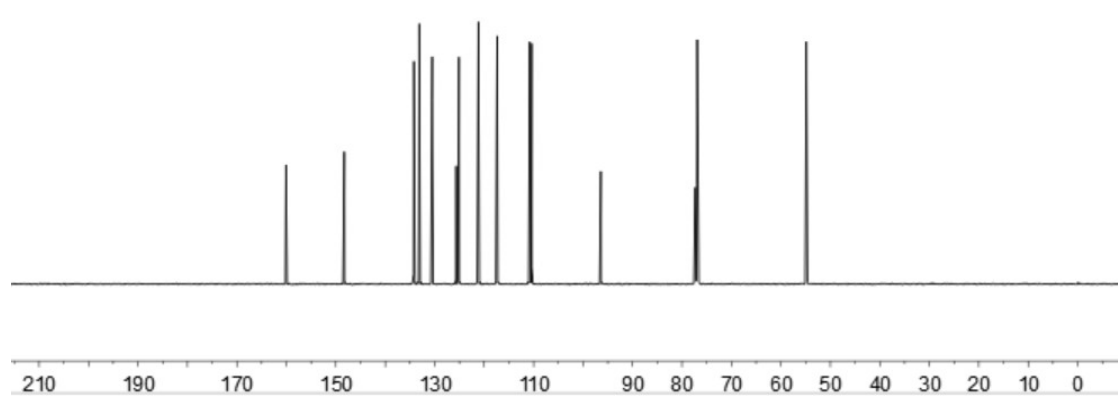

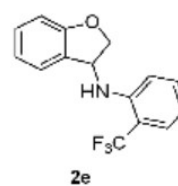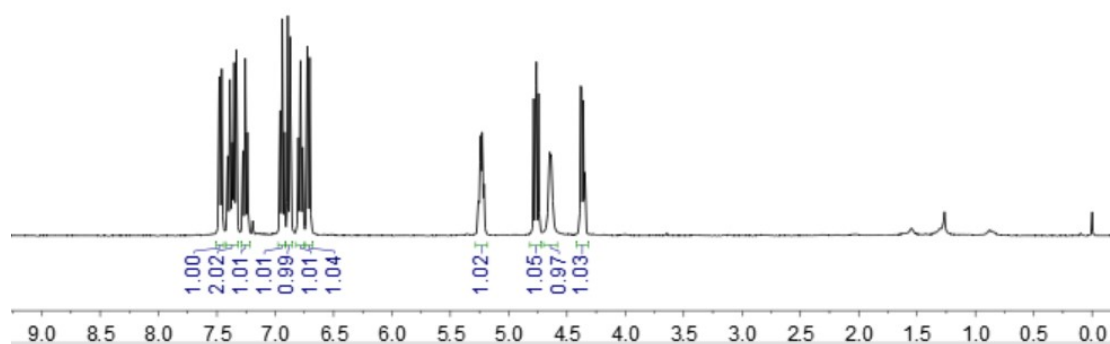

Chemical shift values (ppm):  
 -160.217  
 -144.074  
 -144.062  
 -133.174  
 -130.411  
 -127.126  
 -127.073  
 -127.017  
 -126.509  
 -126.245  
 -125.066  
 -121.224  
 -116.978  
 -114.378  
 -114.084  
 -112.148  
 -110.883  
 -110.868  
 -55.521

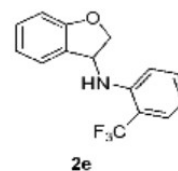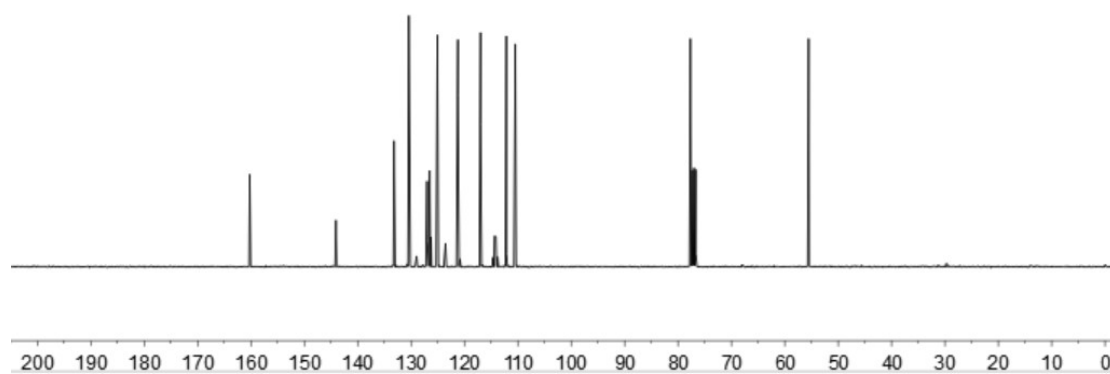



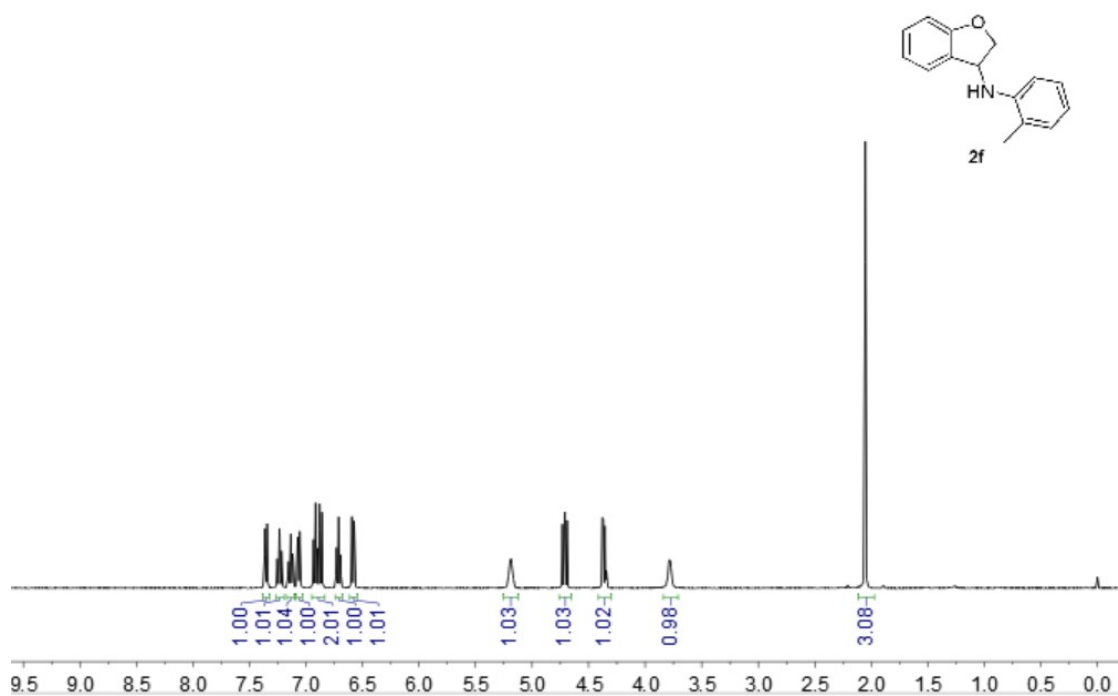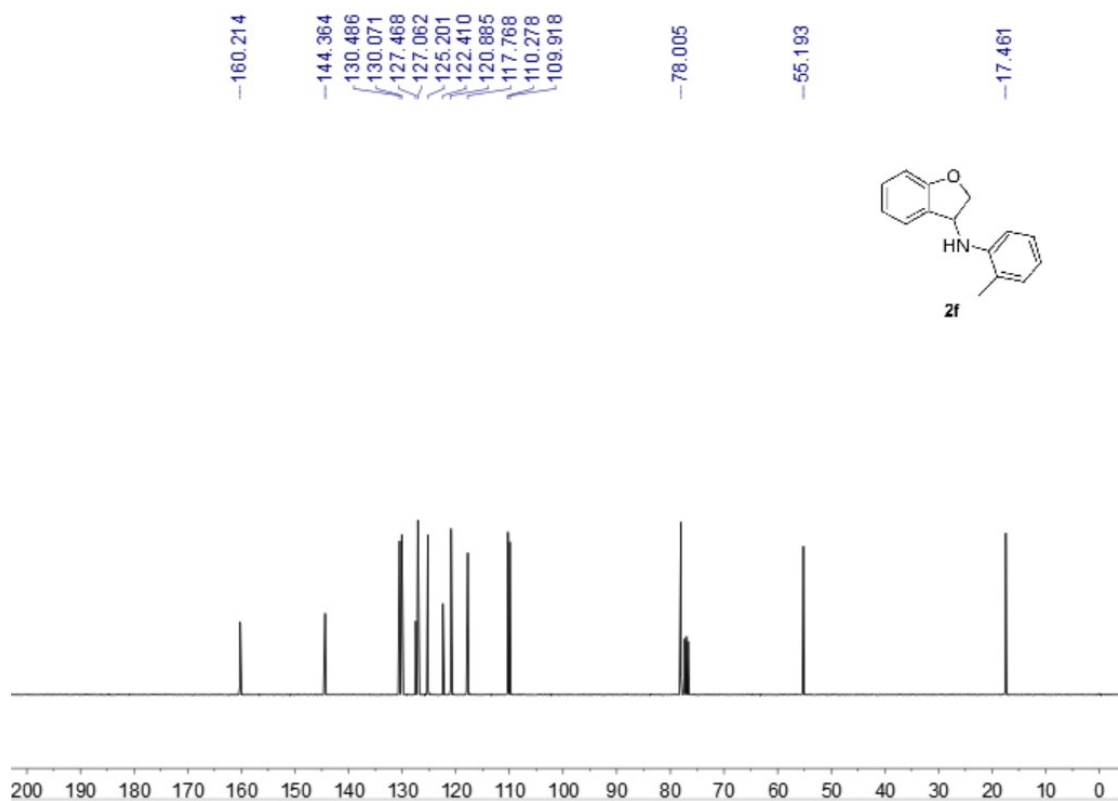

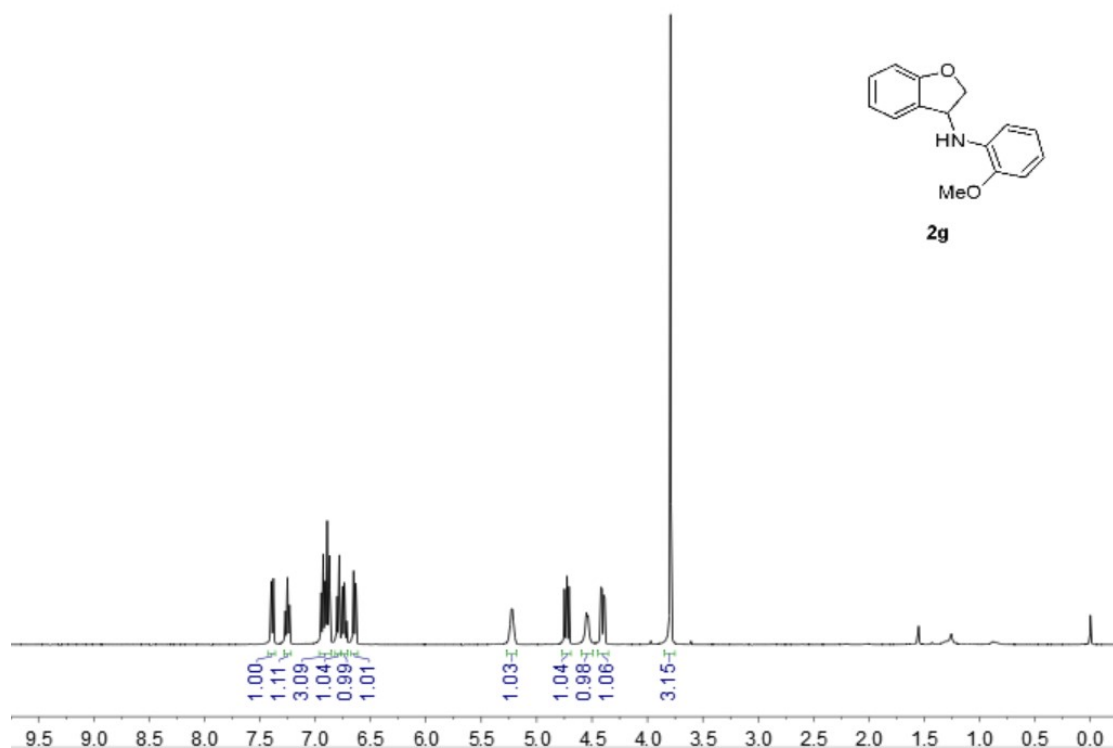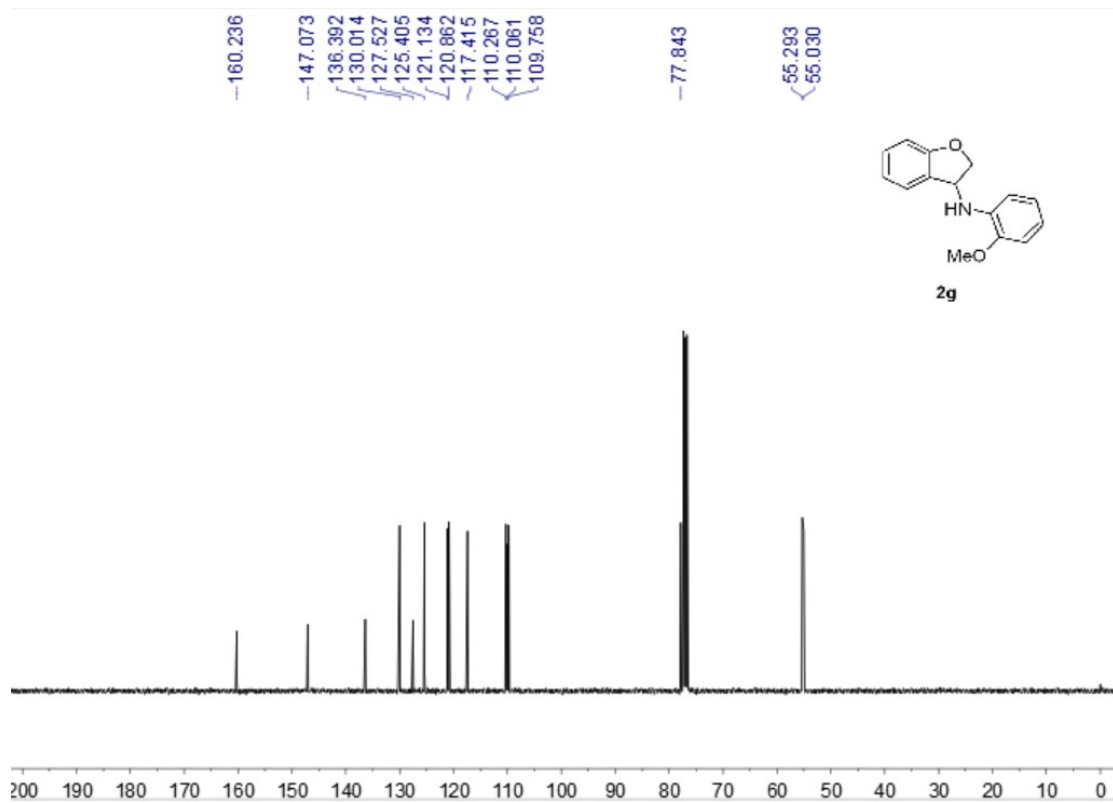

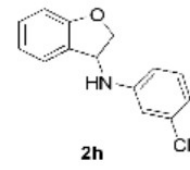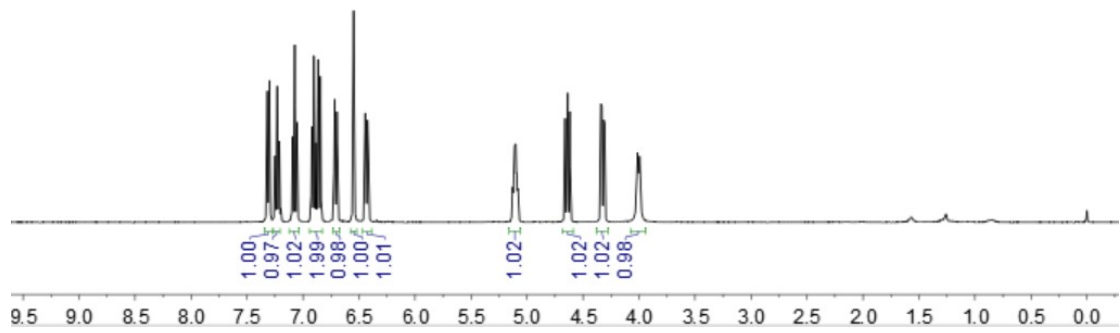

Chemical shift values (ppm):  
-160.104  
-147.478  
-135.157  
-130.418  
-130.283  
-126.830  
-125.205  
-120.982  
-118.014  
-112.762  
-111.402  
-110.366  
-77.355  
-55.151

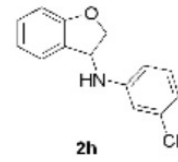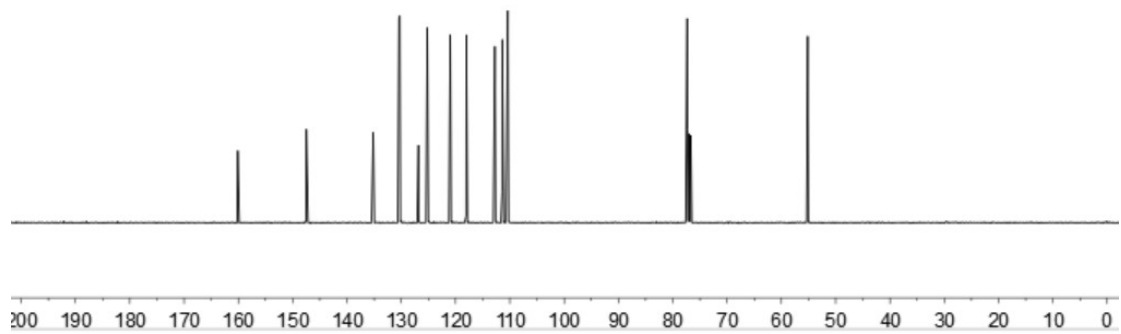

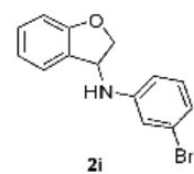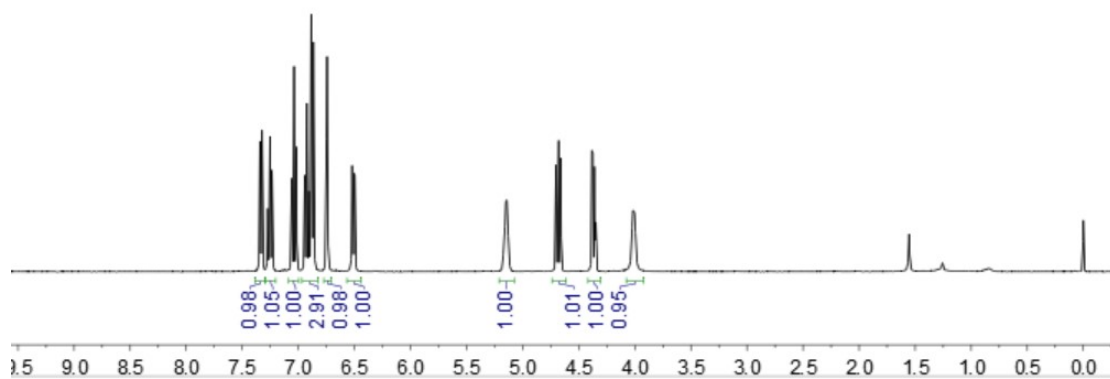

Chemical shift values (ppm):  
 -160.165  
 -147.652  
 130.745  
 130.351  
 126.829  
 125.231  
 123.442  
 121.042  
 121.011  
 115.699  
 111.869  
 110.454  
 -77.422  
 -55.223

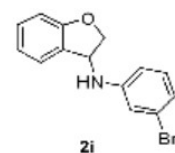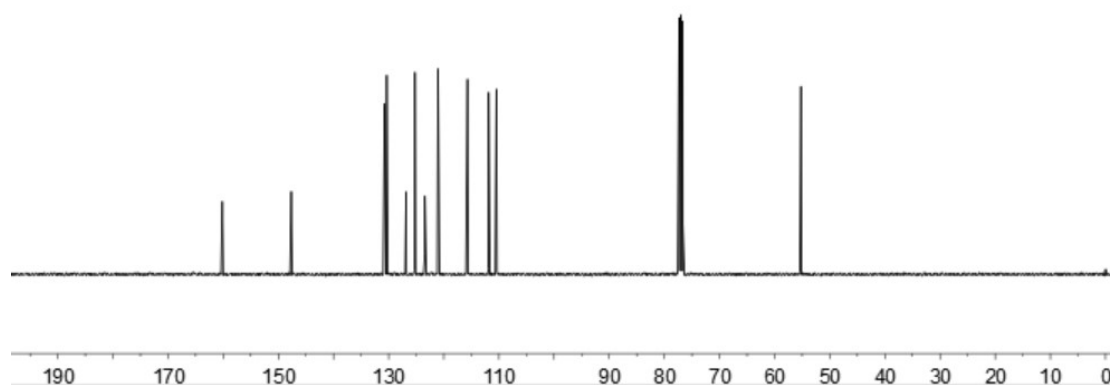

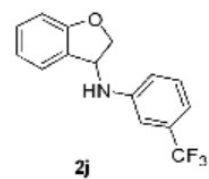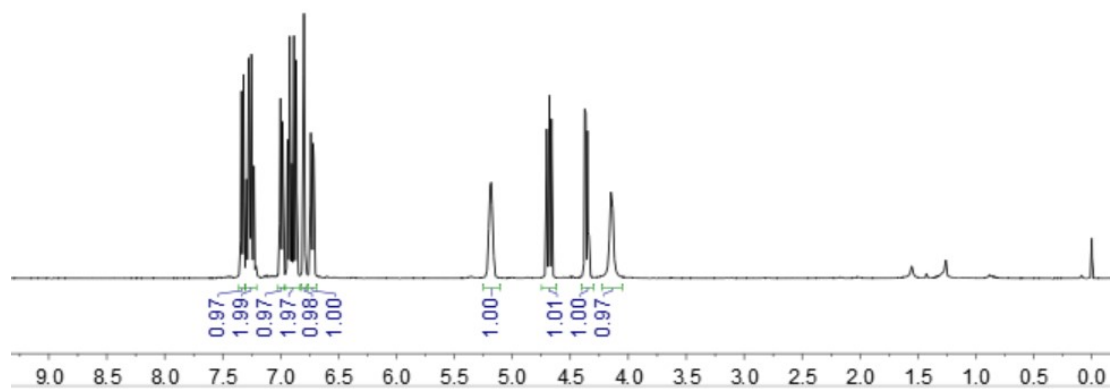

Chemical shift values (ppm): -160.183, -146.576, 131.978, 131.661, 130.405, 129.933, 126.776, 125.212, 121.089, 116.066, 114.665, 114.626, 114.588, 110.487, 109.303, 109.265, 77.304, 77.225, -55.218

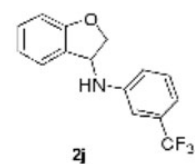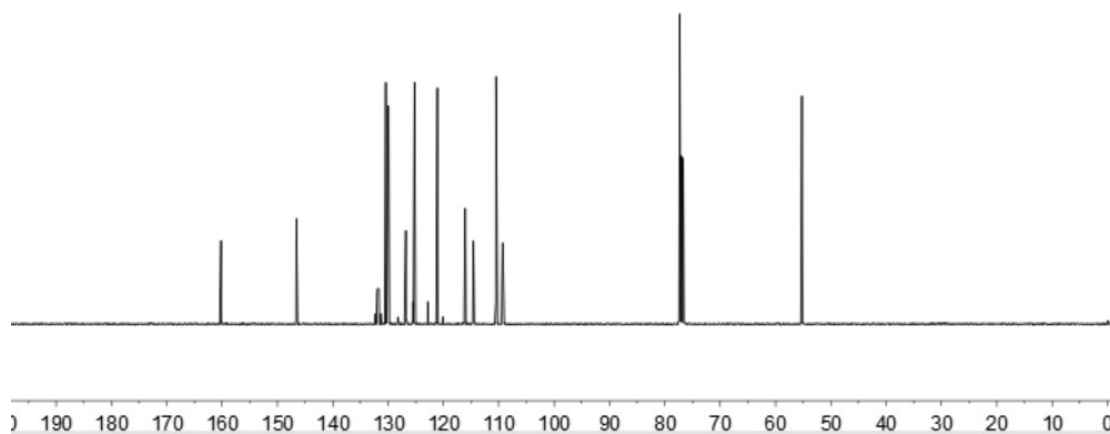

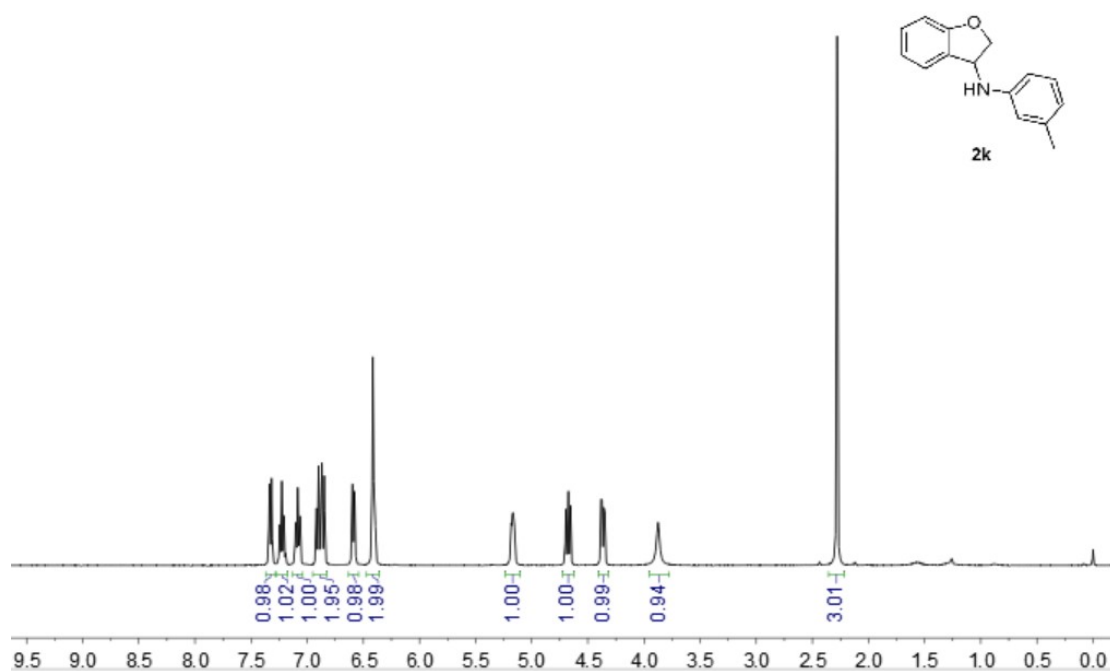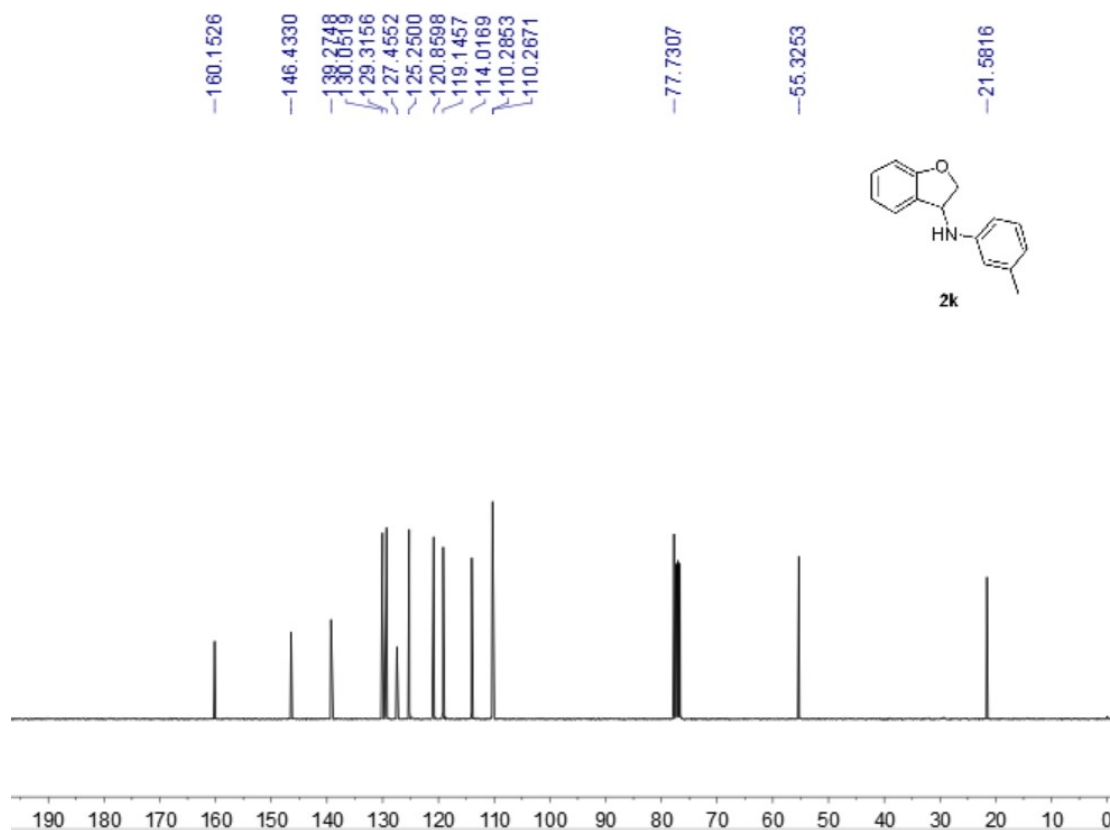

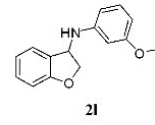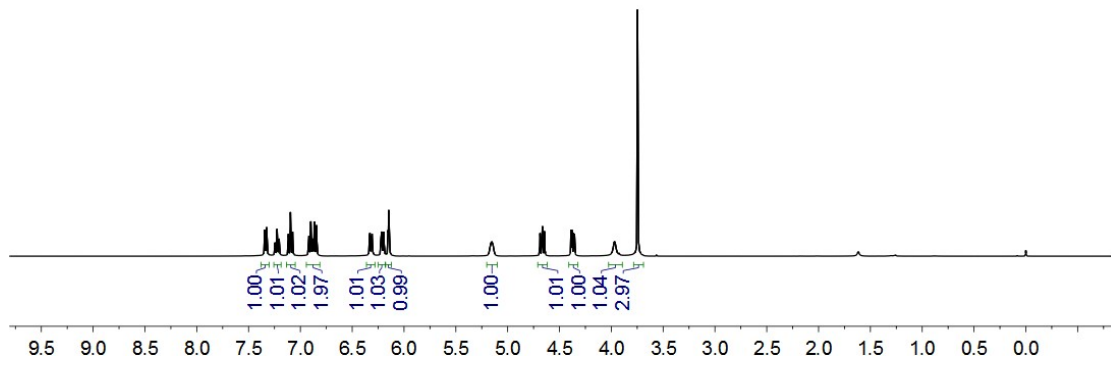

160.852  
160.136  
147.749  
130.226  
130.087  
127.246  
125.264  
120.864  
110.278  
106.186  
103.134  
99.377  
77.615  
55.296  
55.030

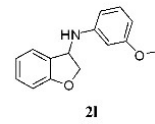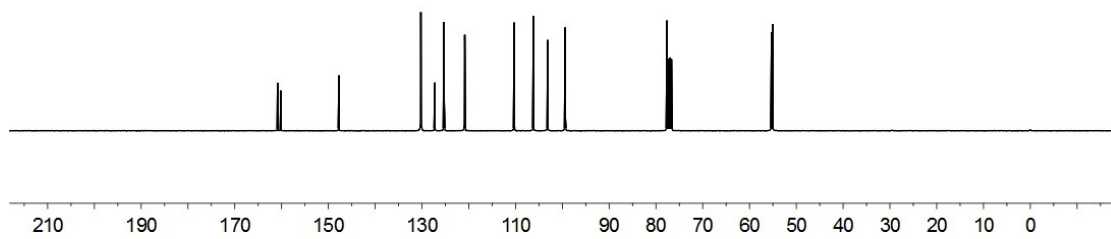

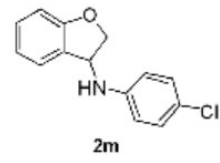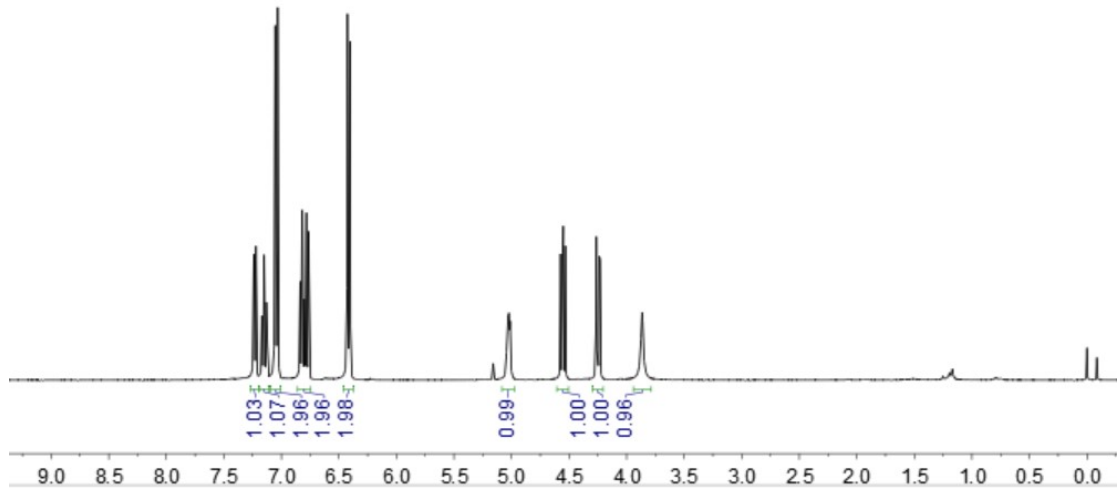

Chemical shift values (ppm):  
 -160.047  
 -144.844  
 130.241  
 129.254  
 126.935  
 125.218  
 122.692  
 120.954  
 114.211  
 110.360  
 -77.260  
 -55.321

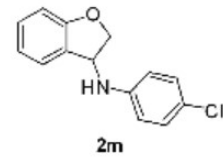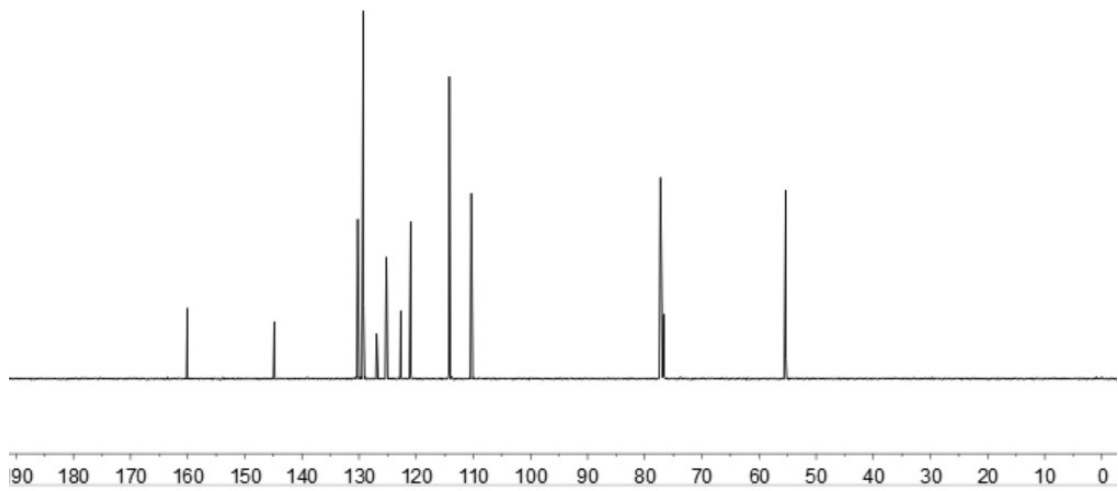



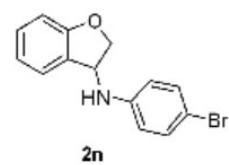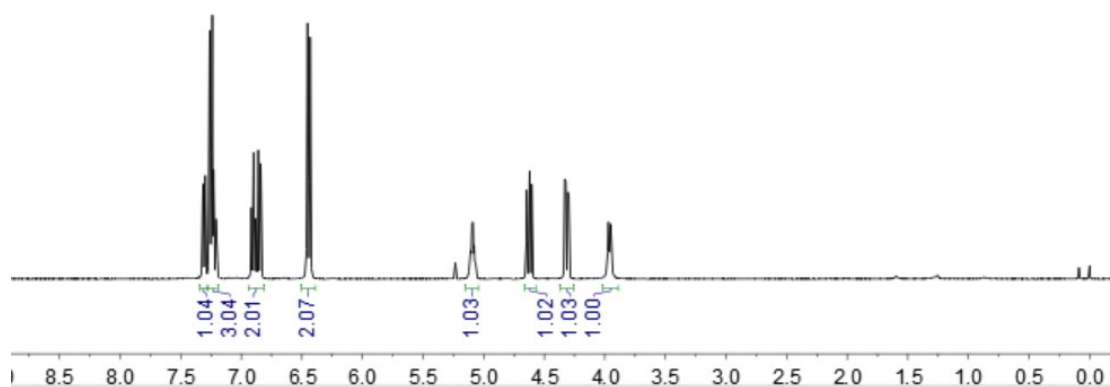

Chemical shift values (ppm): -159.987, -145.214, 132.062, 130.203, 126.843, 125.186, 120.914, 114.642, 110.306, 109.670, -77.167, -55.147.

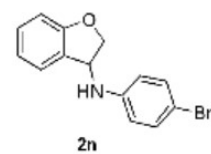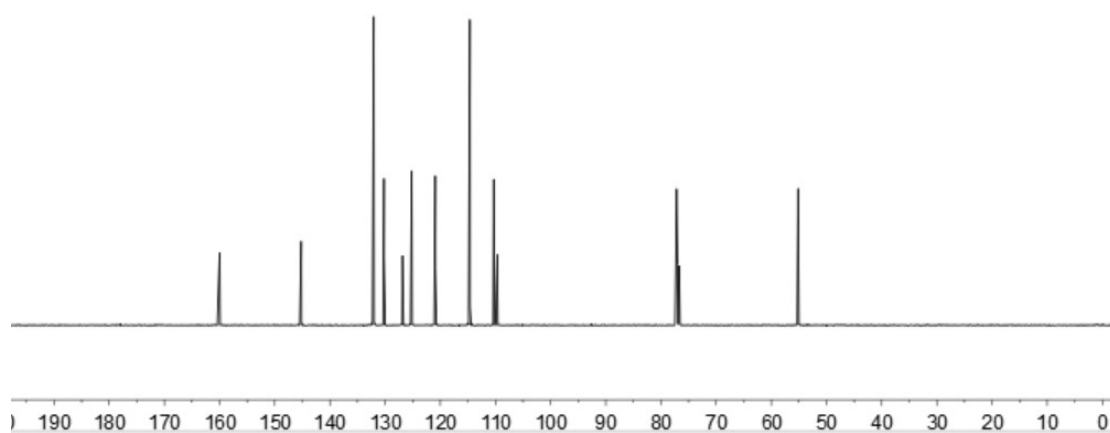

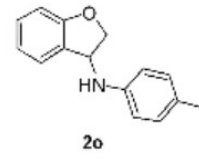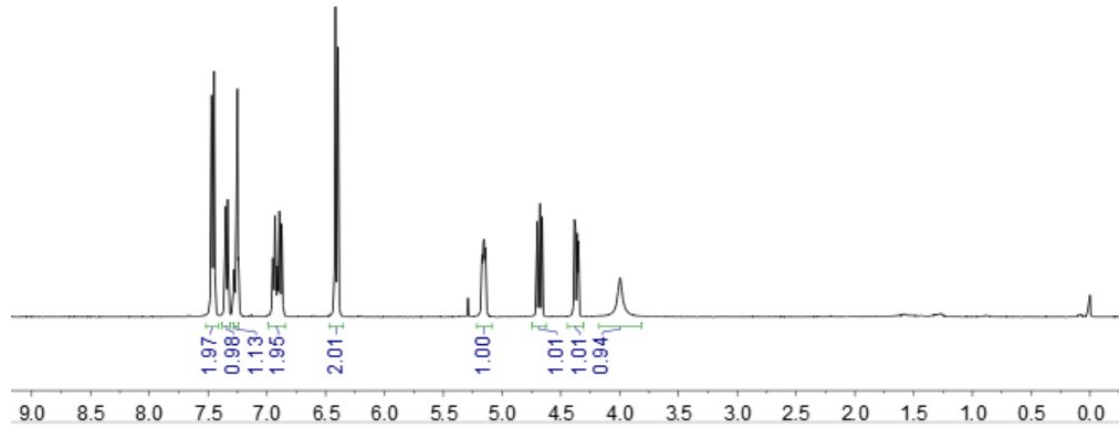

Chemical shift values (ppm) for the <sup>13</sup>C NMR spectrum:

- 160.190
- 145.983
- 138.088
- 130.348
- 126.956
- 125.237
- 121.056
- 115.401
- 110.471
- 78.976
- 55.299

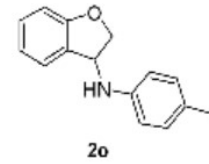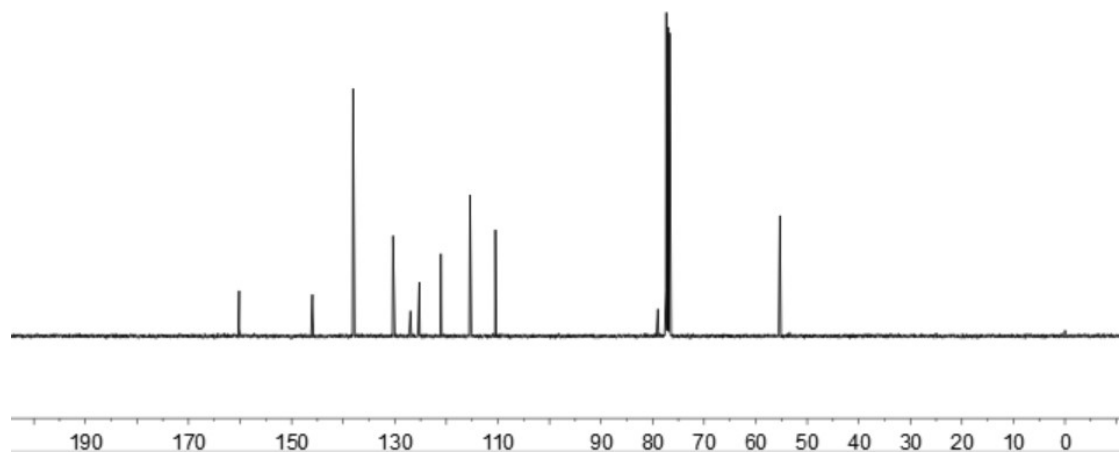

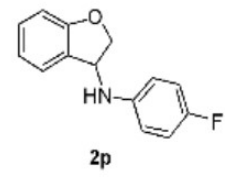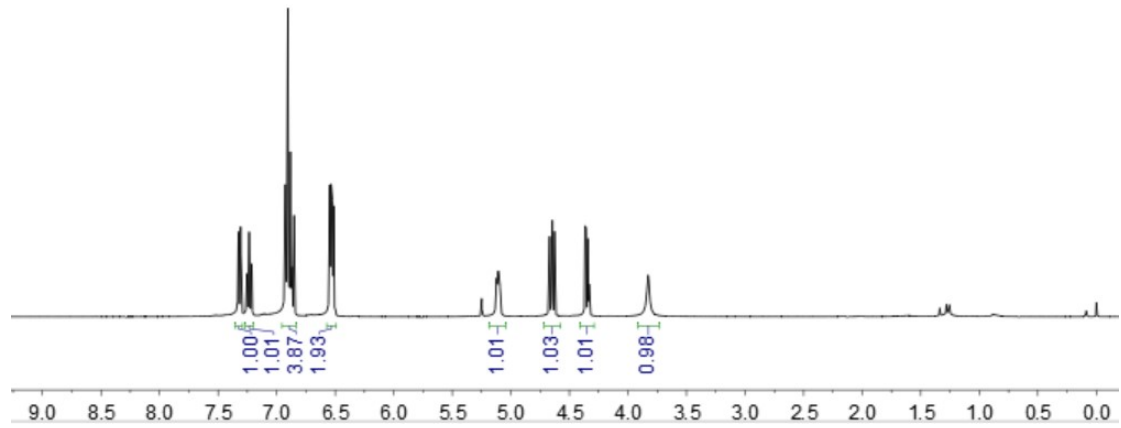

160.038  
 157.271  
 154.924  
 142.645  
 142.629  
 130.144  
 127.202  
 125.212  
 120.890  
 116.011  
 115.790  
 114.172  
 114.098  
 110.327

-77.315

-55.859

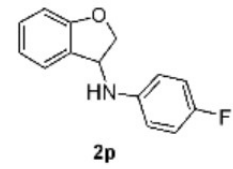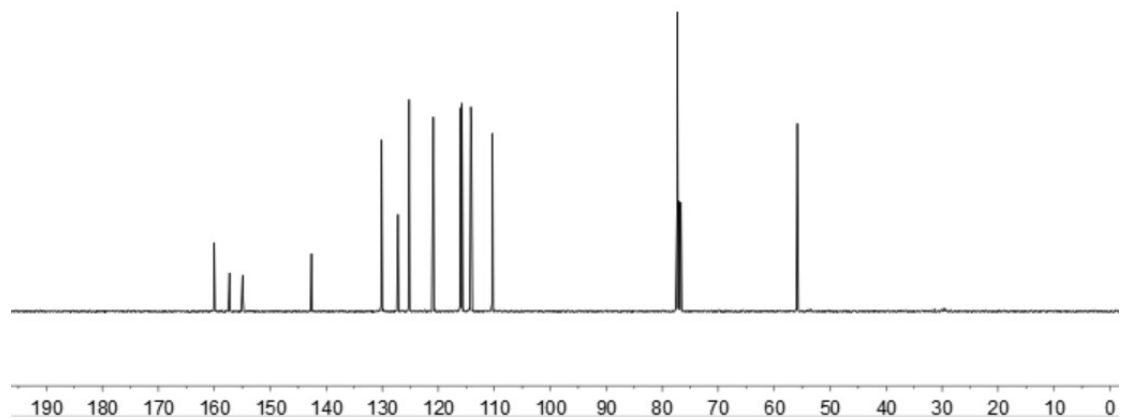

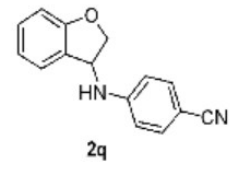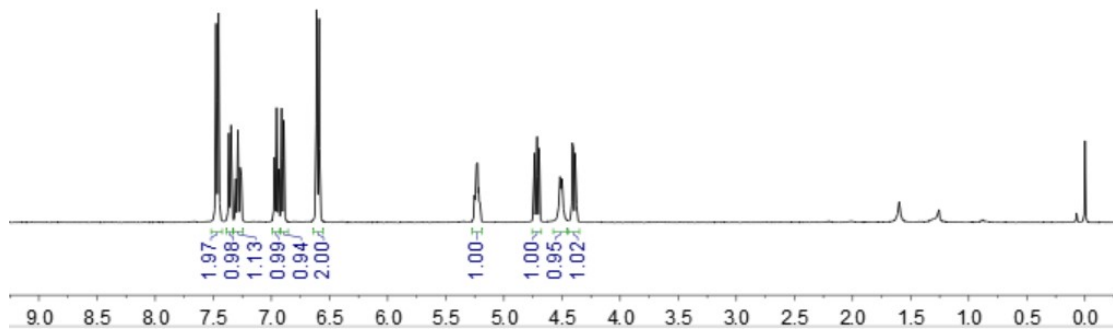

Chemical shift values (ppm):  
 -160.234  
 -149.458  
 -133.933  
 -130.678  
 -126.067  
 -125.194  
 -121.240  
 -119.981  
 -112.614  
 -110.620  
 -100.005  
 -77.098  
 -54.858

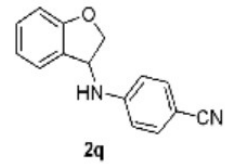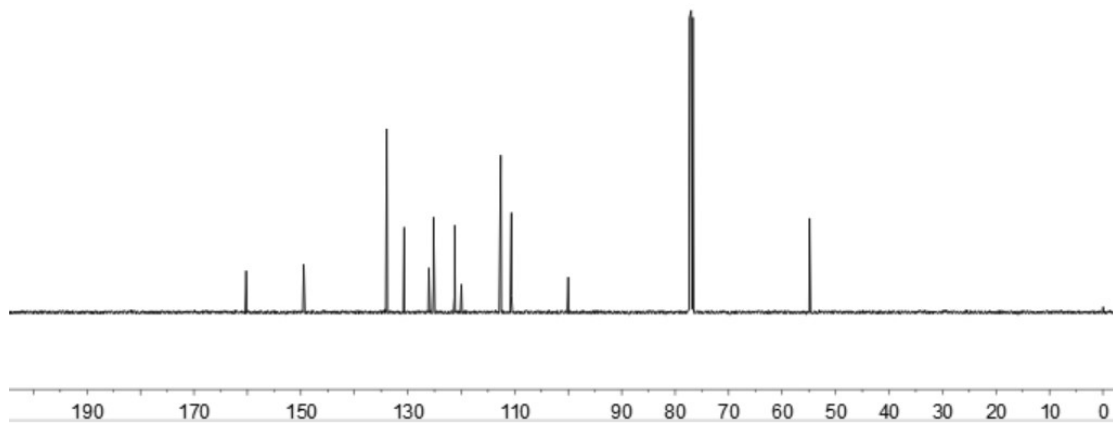

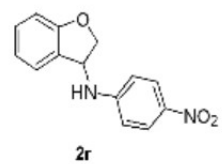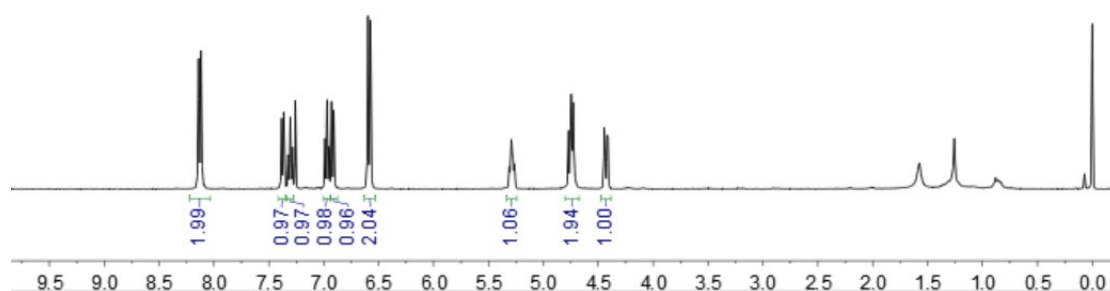

—160.298  
—151.379  
—138.940  
—130.861  
—126.518  
—125.776  
—125.205  
—121.356  
—111.576  
—110.733  
—77.035  
—55.109

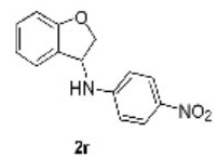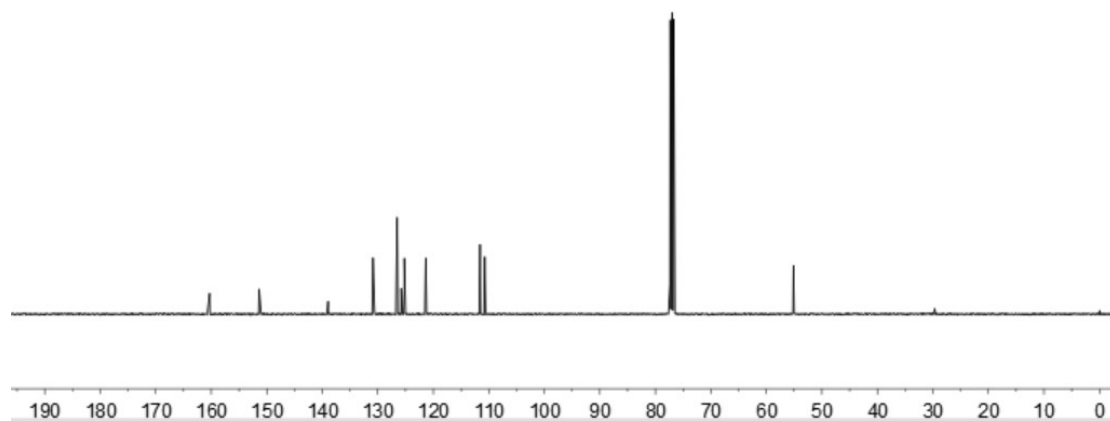

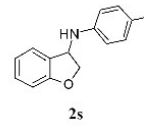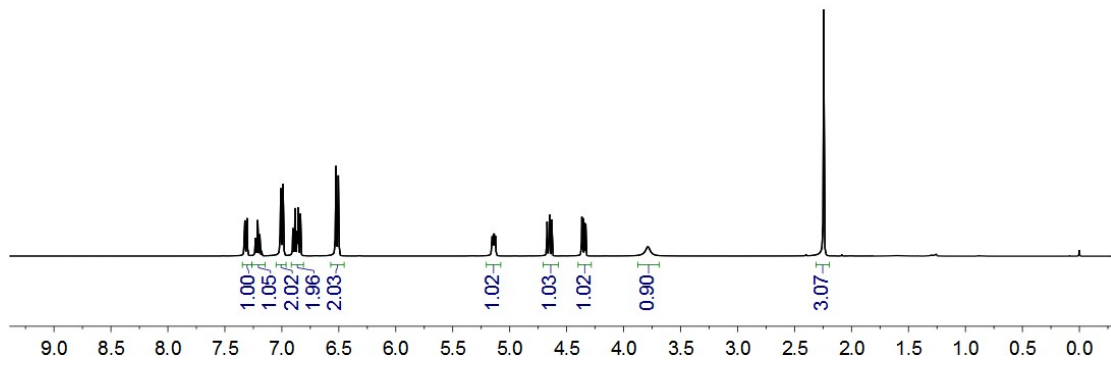

-160.109  
-144.100  
129.978  
129.908  
127.556  
127.460  
125.235  
120.807  
113.429  
110.244  
-77.586  
-55.621  
-20.330

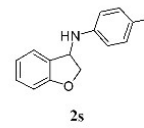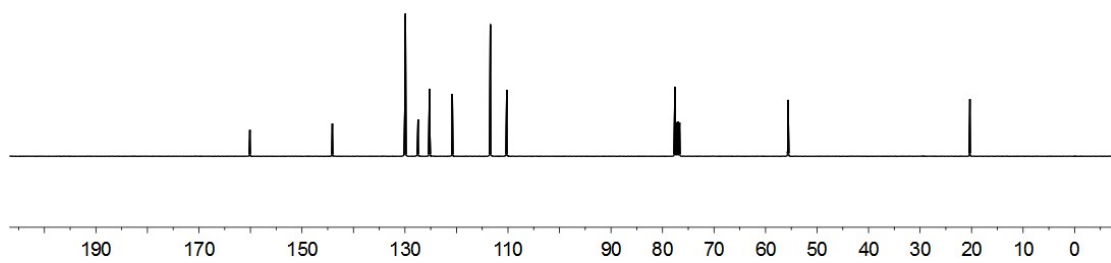

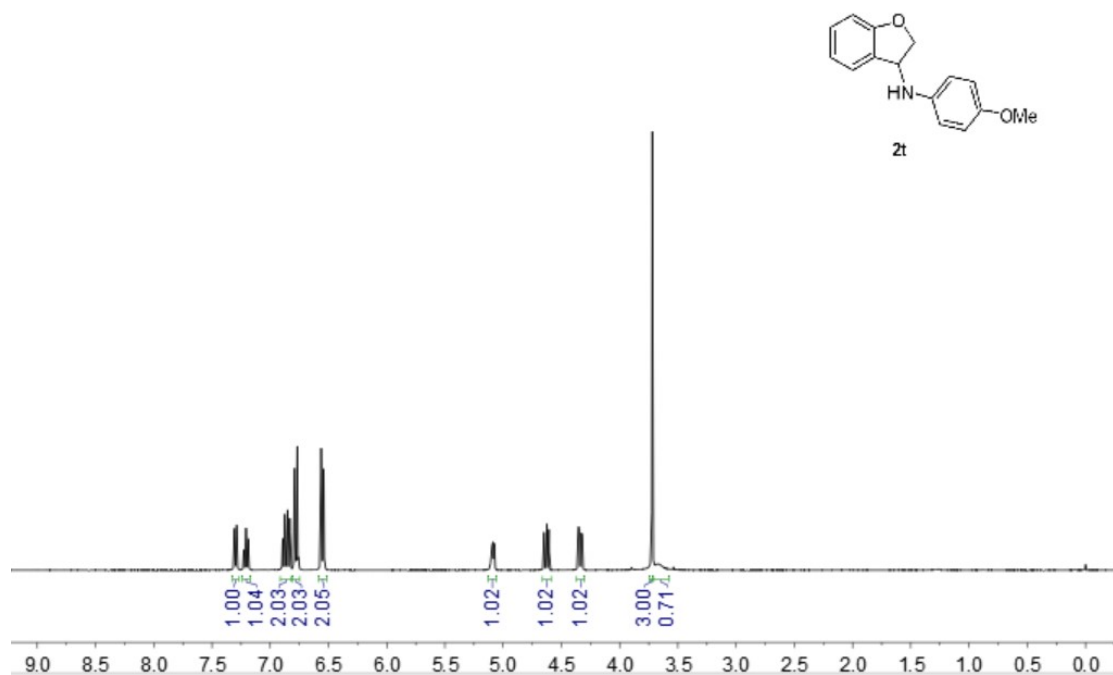

-159.939  
 -152.443  
 -140.366  
 -129.870  
 -127.516  
 -125.183  
 -120.891  
 -114.836  
 -110.138  
 -77.330  
 -56.053  
 -55.513

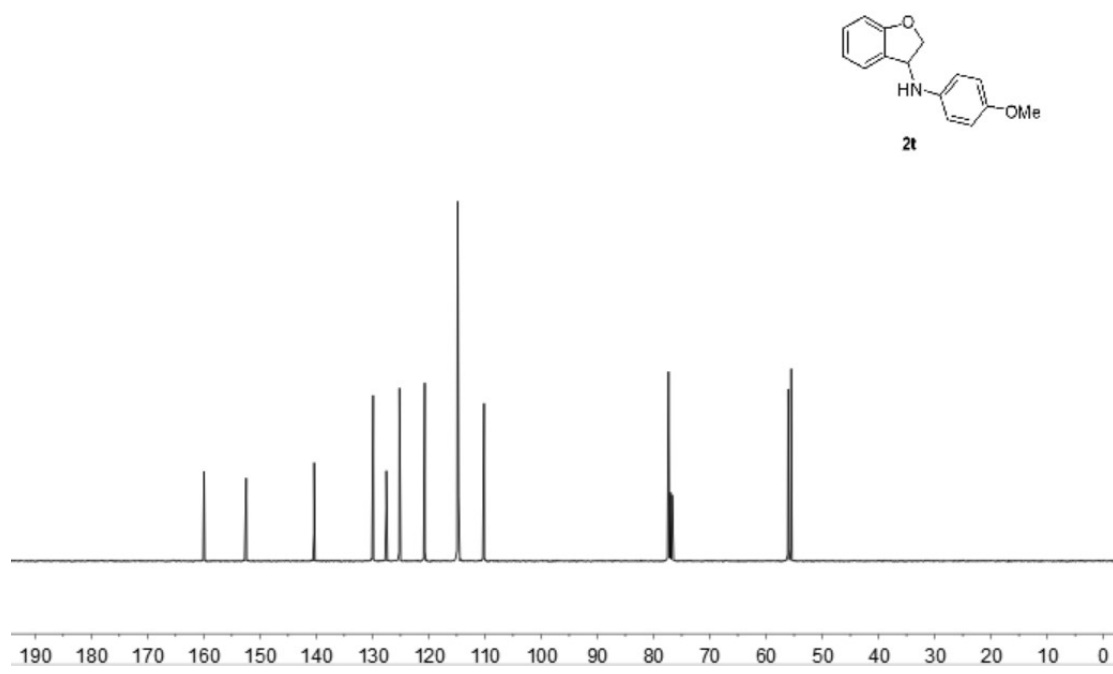

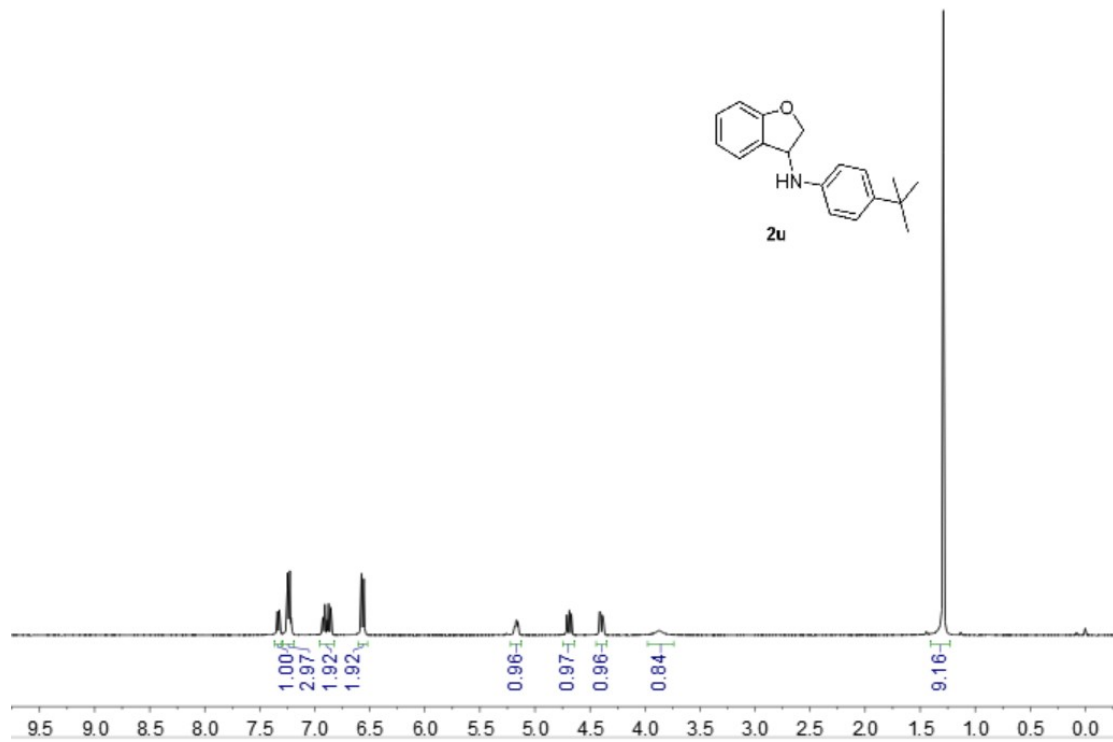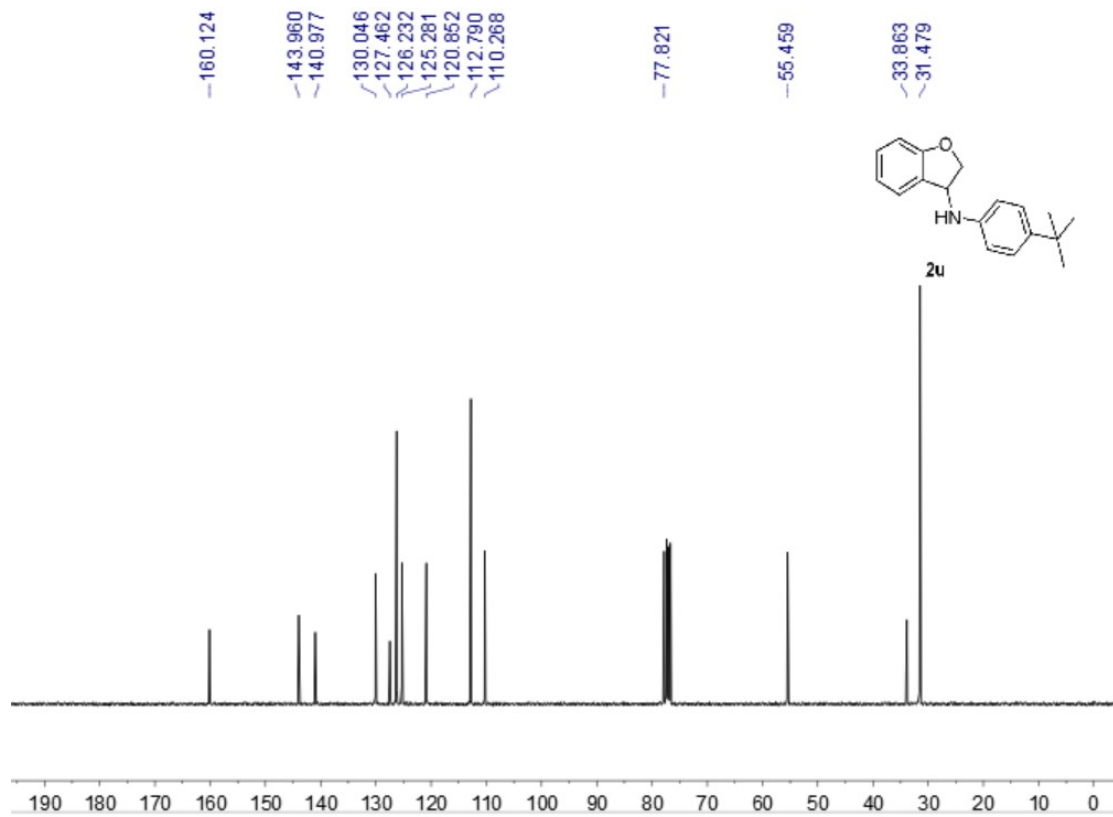



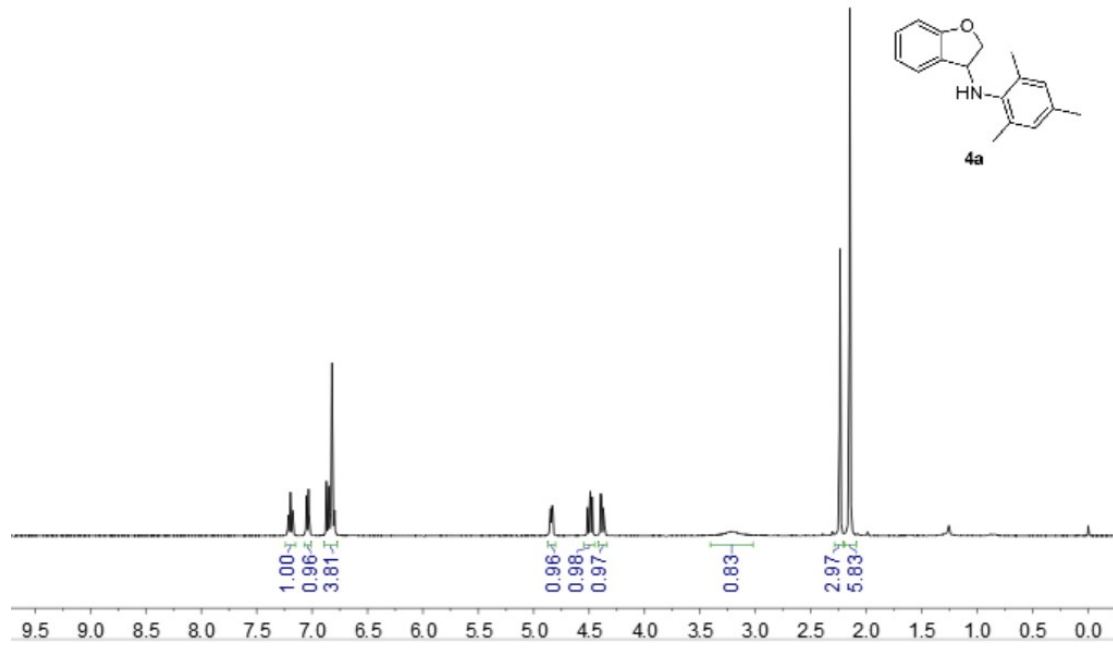

Chemical structure of 4a: Cc1cc(C)cc(NC2Cc3ccccc3O2)c1

<sup>13</sup>C NMR spectrum (ppm):

- 159.717
- 140.992
- 129.639
- 129.597
- 129.566
- 128.828
- 125.226
- 110.549
- 77.289
- 58.968
- 20.553
- 18.588

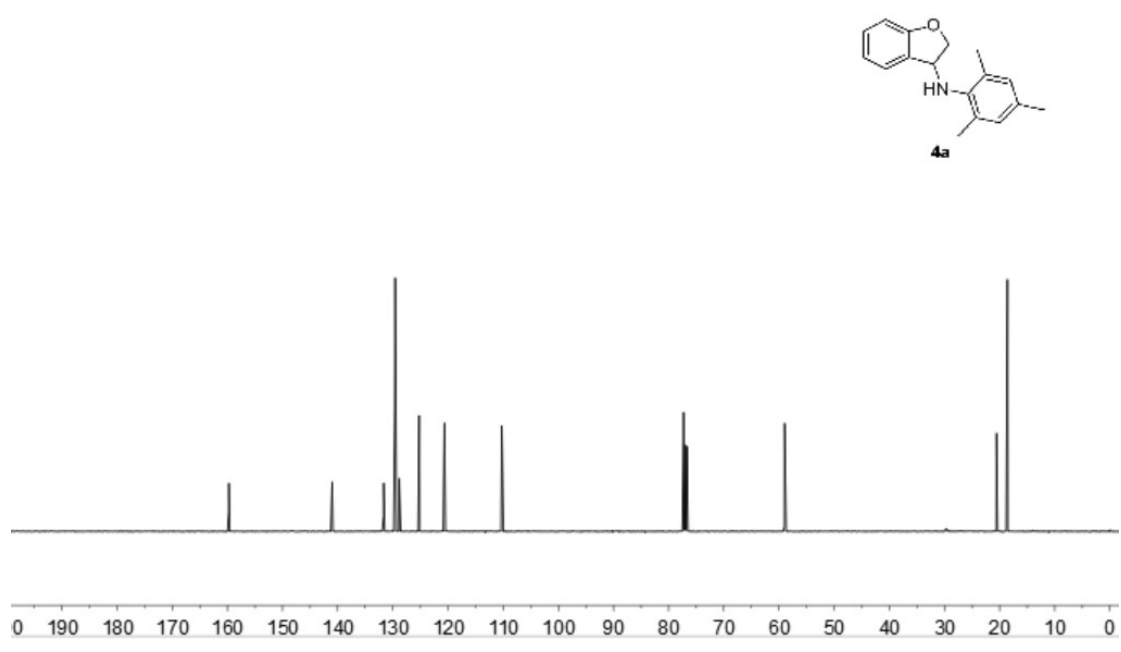

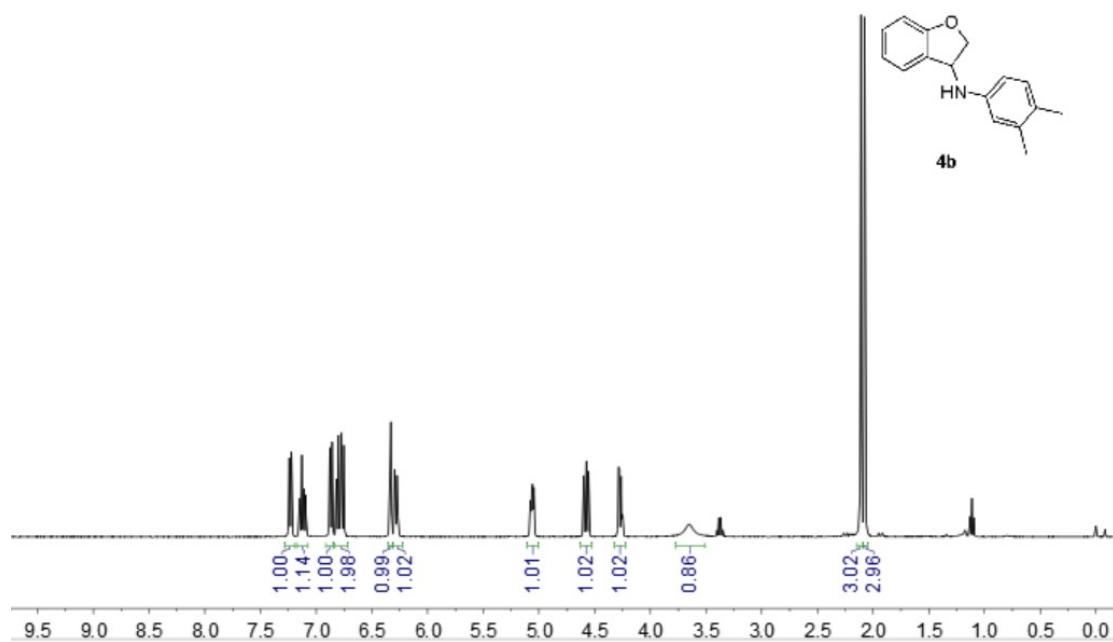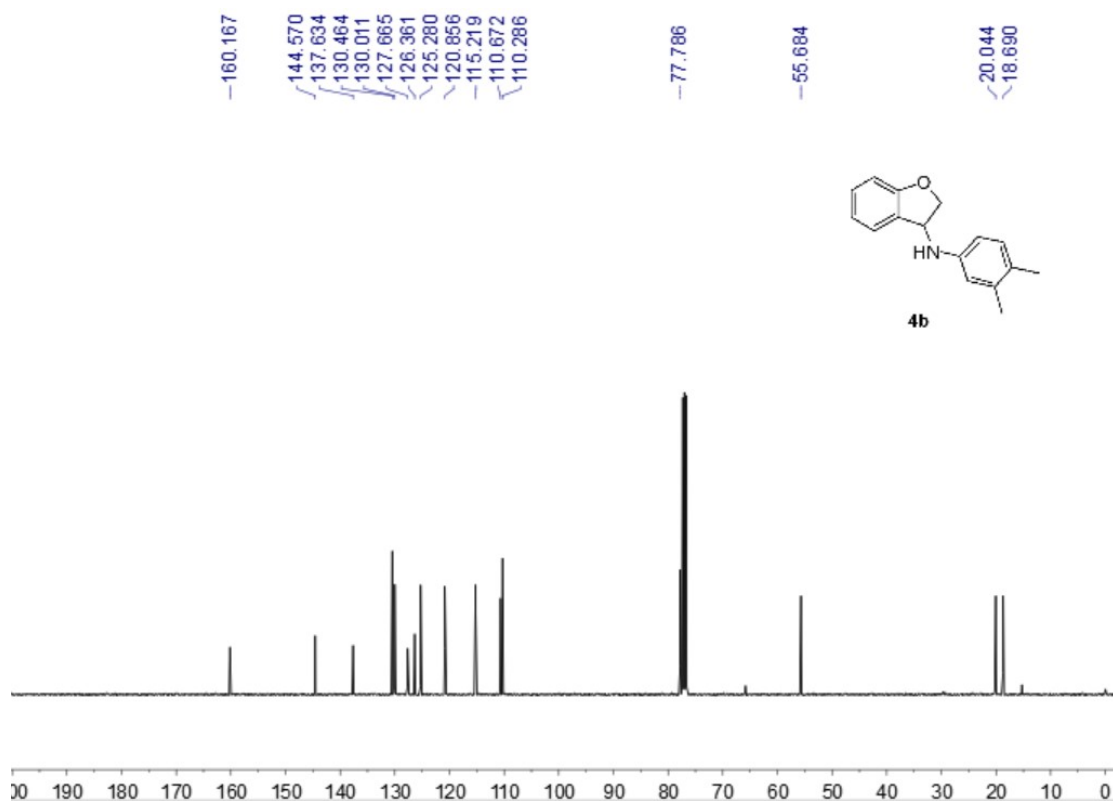

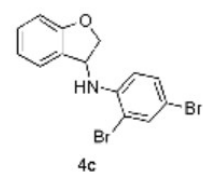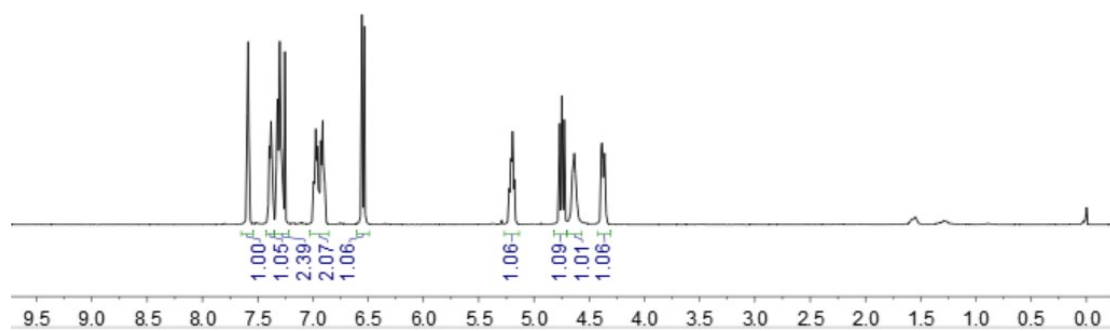

Chemical shift values (ppm): -160.232, 142.635, 134.867, 131.283, 130.518, 126.410, 125.214, 121.246, 112.454, 110.554, 110.432, 109.105, -77.316, -55.580.

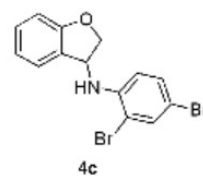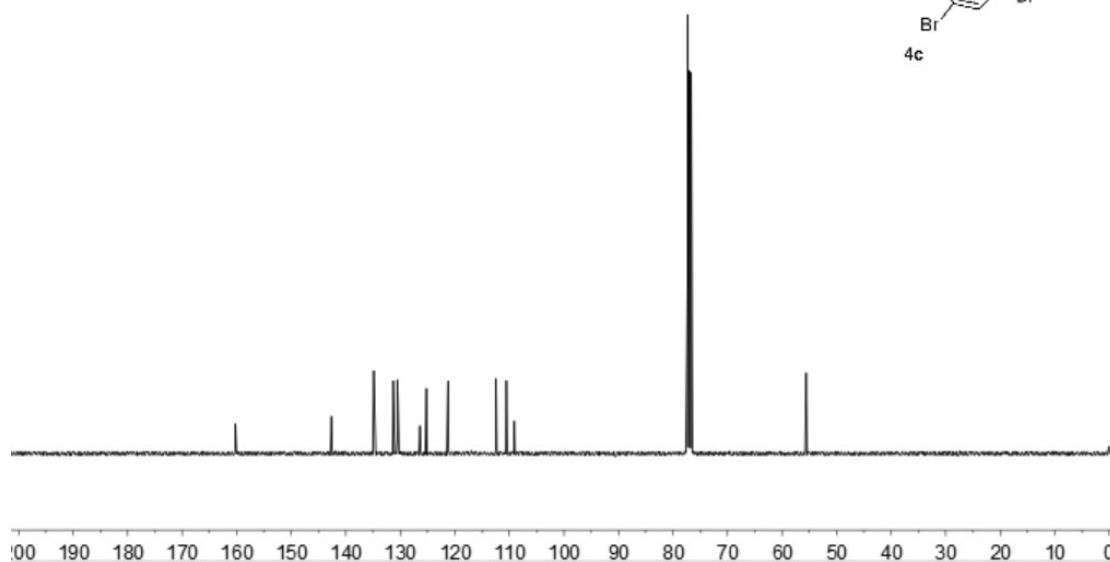

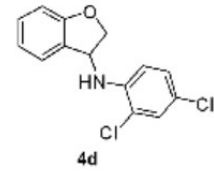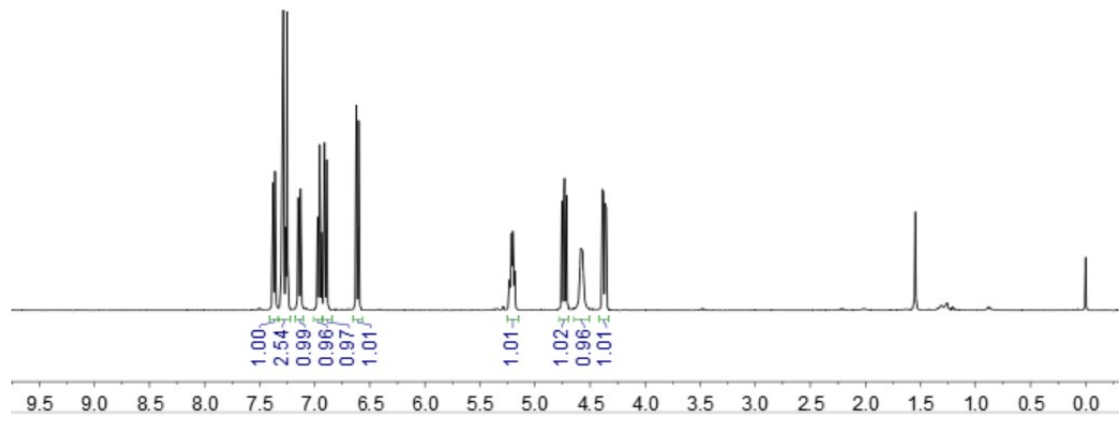

Chemical shift values (ppm):  
 -160.226  
 -141.205  
 -130.491  
 -129.242  
 -127.779  
 -126.459  
 -125.222  
 -122.193  
 -121.204  
 -120.000  
 -111.932  
 -110.536  
 -77.322  
 -55.403

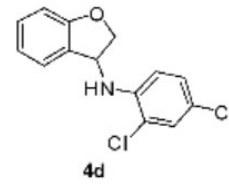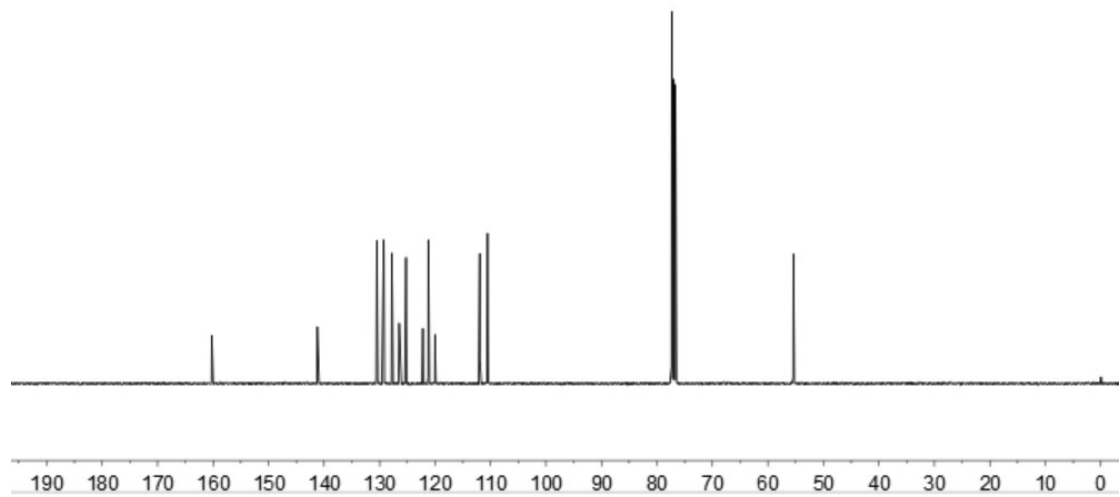

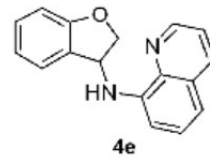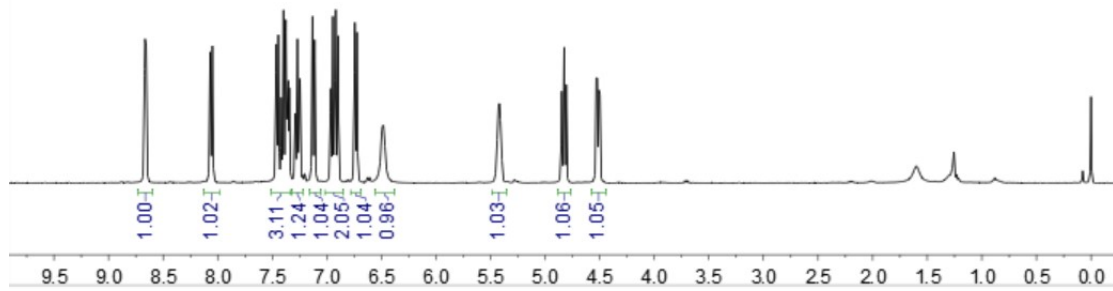

Chemical shift values (ppm) for the <sup>13</sup>C NMR spectrum:

- 160.363
- 147.114
- 143.197
- 138.276
- 135.986
- 130.090
- 128.781
- 127.493
- 127.289
- 125.516
- 121.610
- 120.984
- 114.979
- 110.317
- 104.976
- 77.620
- 54.977

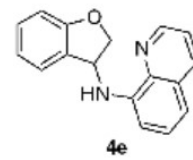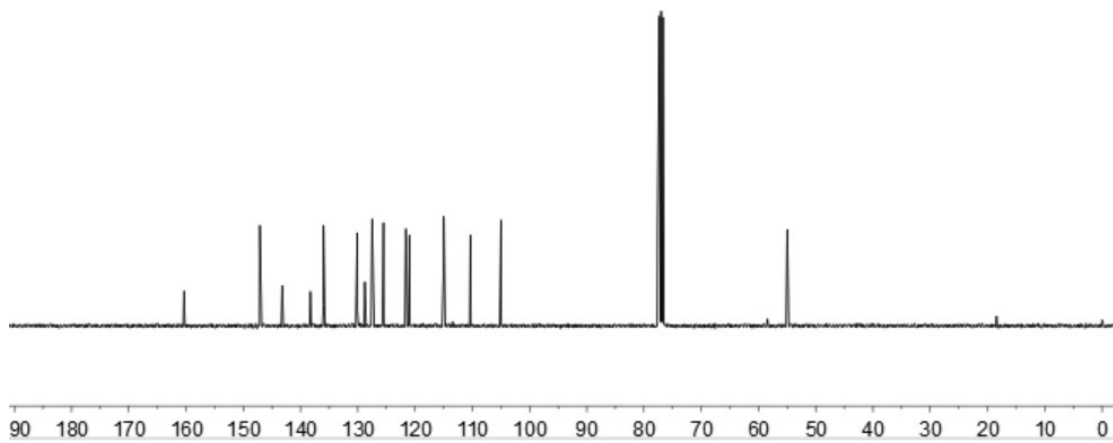

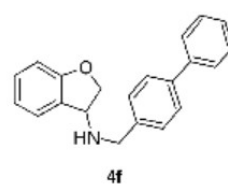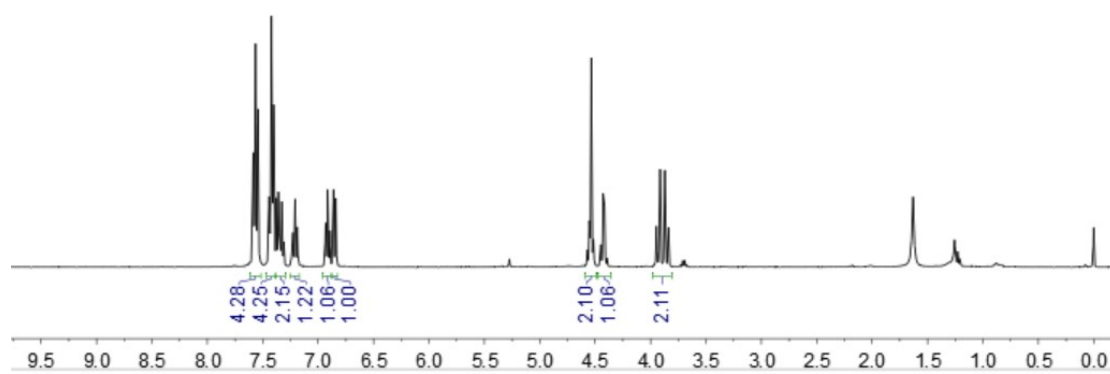

Chemical shift values (ppm): -160.084, -140.870, -140.107, -138.941, -128.728, -128.570, -127.205, -127.024, -125.199, -77.213, -59.348, -50.401

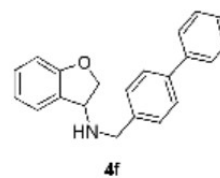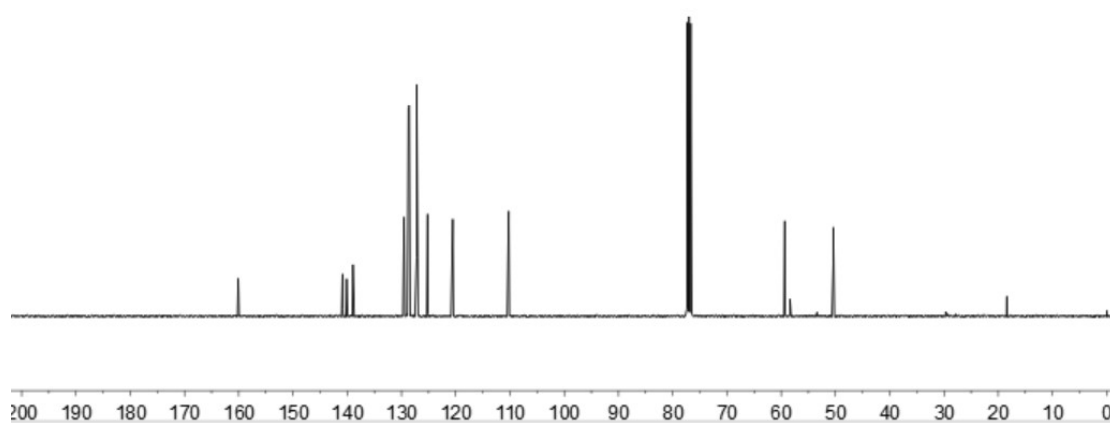

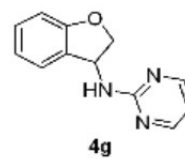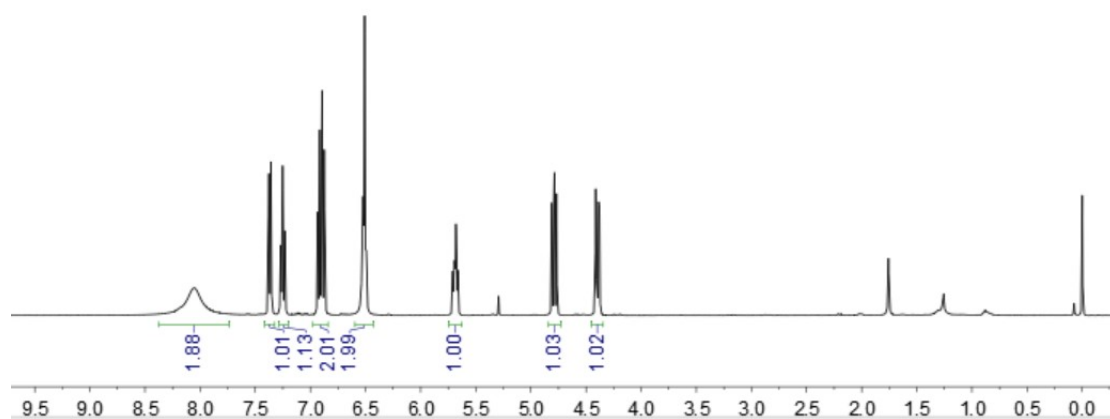

161.462  
160.509  
157.952  
130.040  
126.806  
125.508  
120.911  
111.133  
110.309  
-78.484  
-53.350

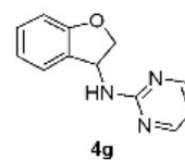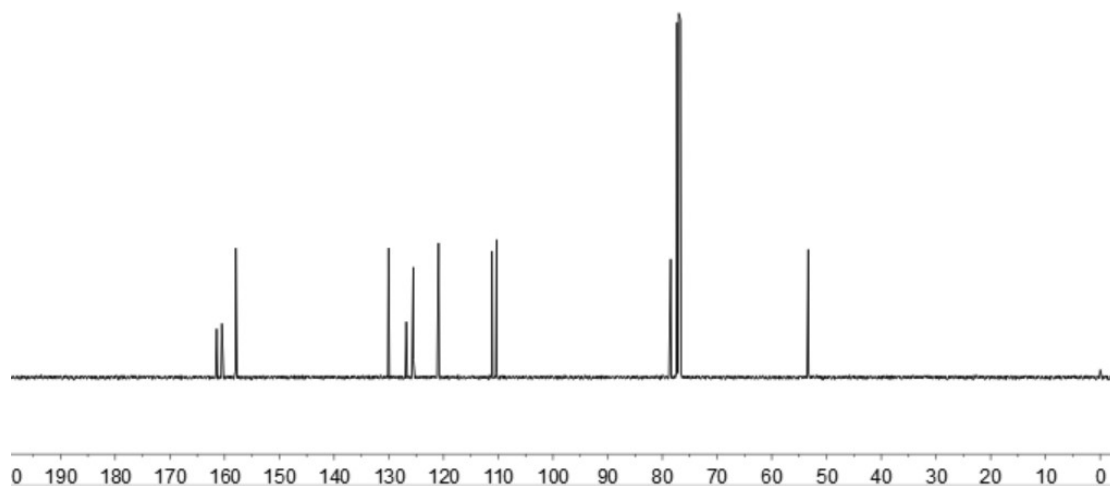

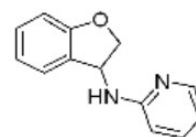

4h

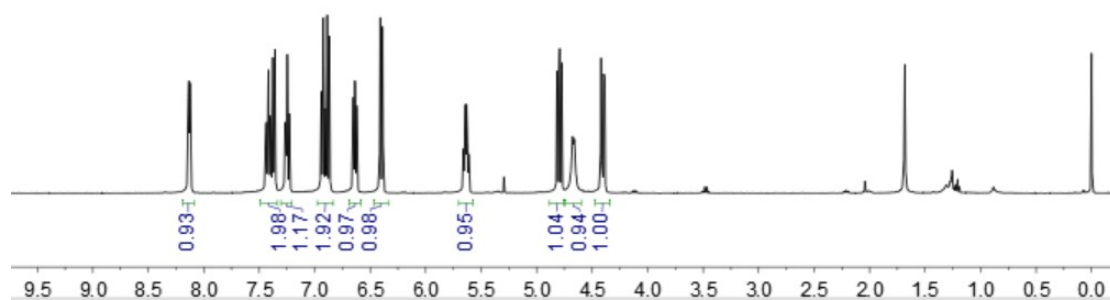

160.478  
157.284  
148.043  
137.343  
130.047  
127.317  
125.283  
120.864  
113.615  
110.301  
108.406  
-78.520  
-53.582

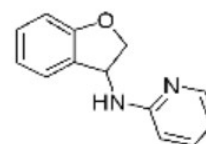

4h

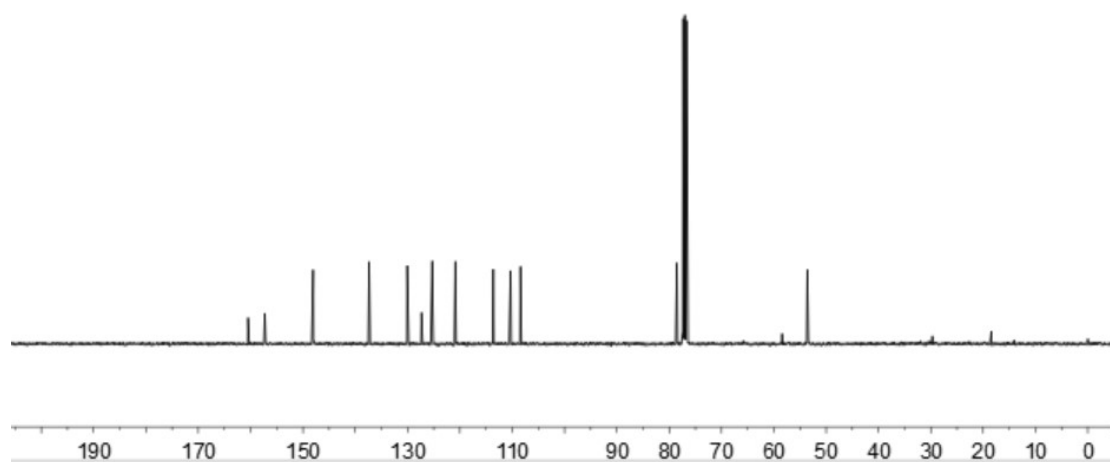



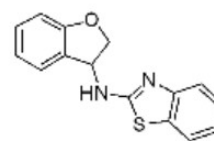

4i

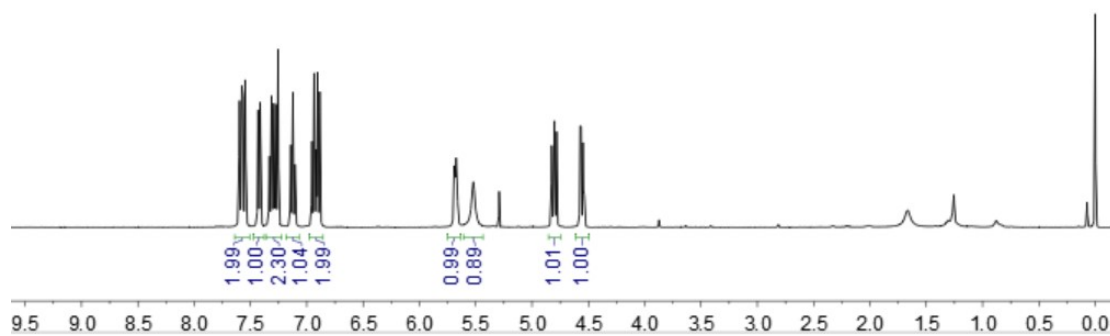

165.0808  
160.4117  
152.2403  
130.6959  
126.0554  
125.7712  
125.5025  
122.1780  
121.1794  
120.8507  
119.4175  
110.5727

-77.7294

-56.7088

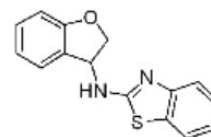

4i

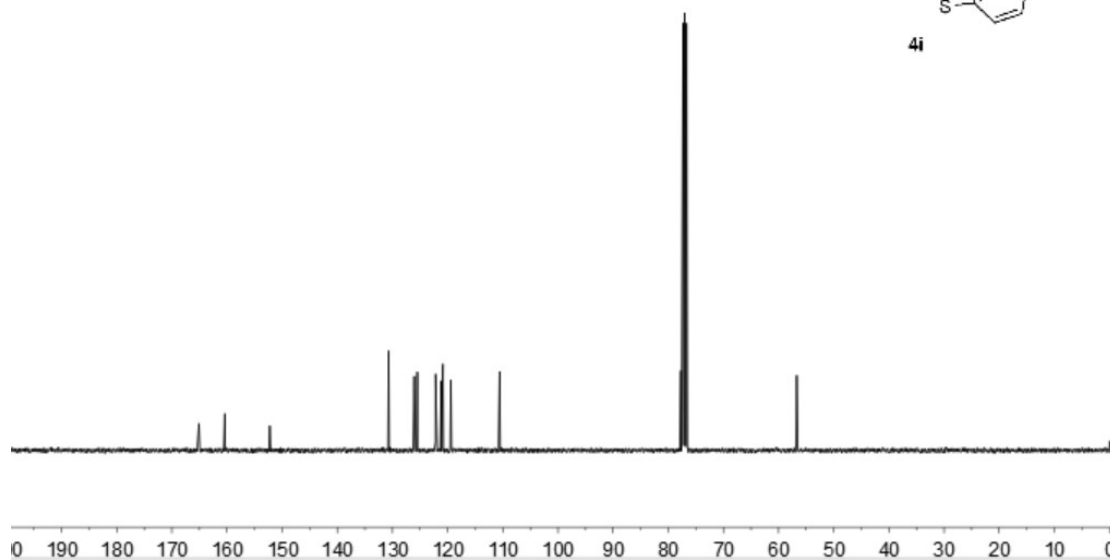

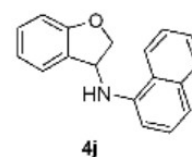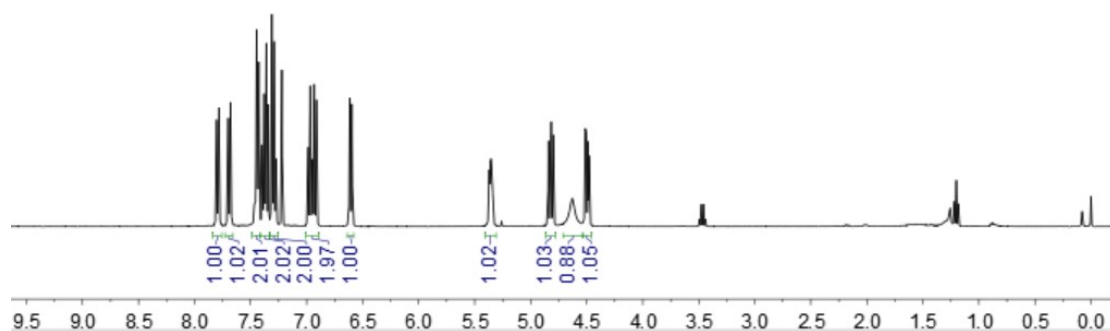

Chemical shift values (ppm): -160.432, 141.691, 134.477, 130.348, 128.700, 127.315, 126.310, 126.031, 125.472, 125.005, 123.477, 121.070, 119.946, 118.406, 110.482, 104.864, -77.879, -55.562

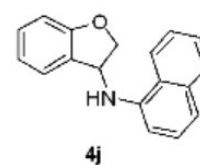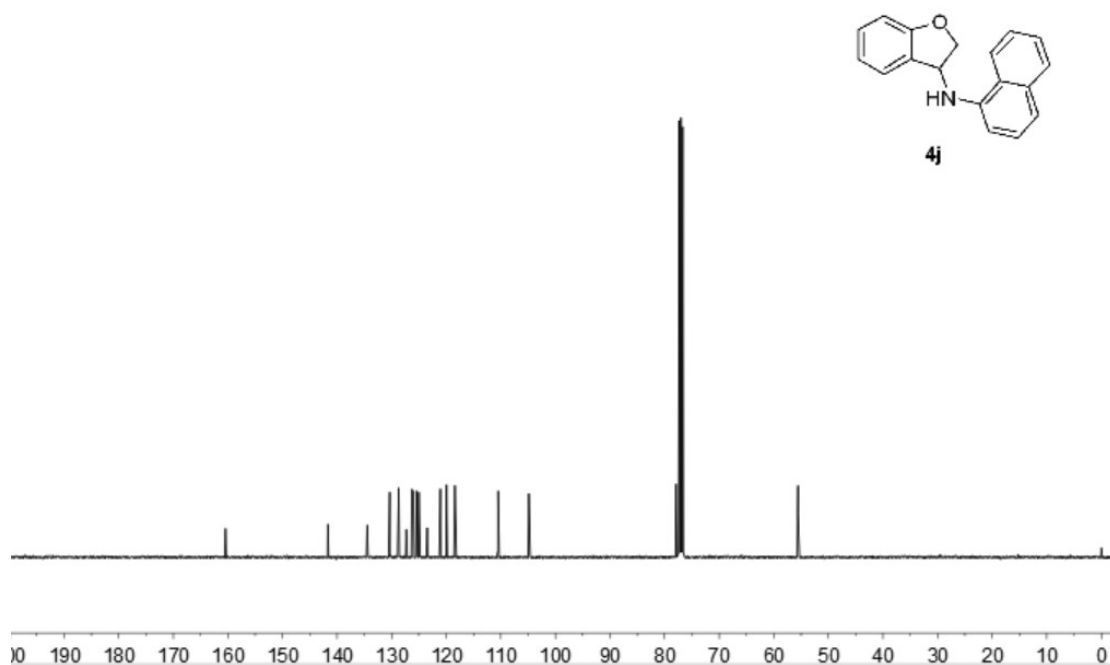

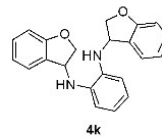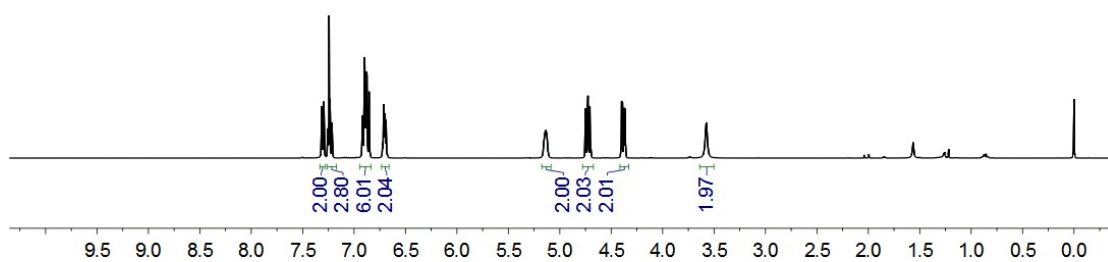

-160.216  
 -135.832  
 -130.083  
 -127.361  
 -125.484  
 -120.902  
 -120.086  
 -113.050  
 -110.268  
 -77.645  
 -55.490

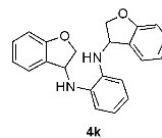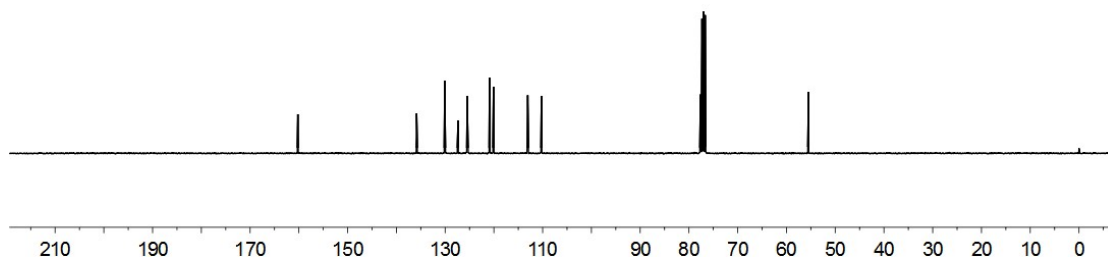

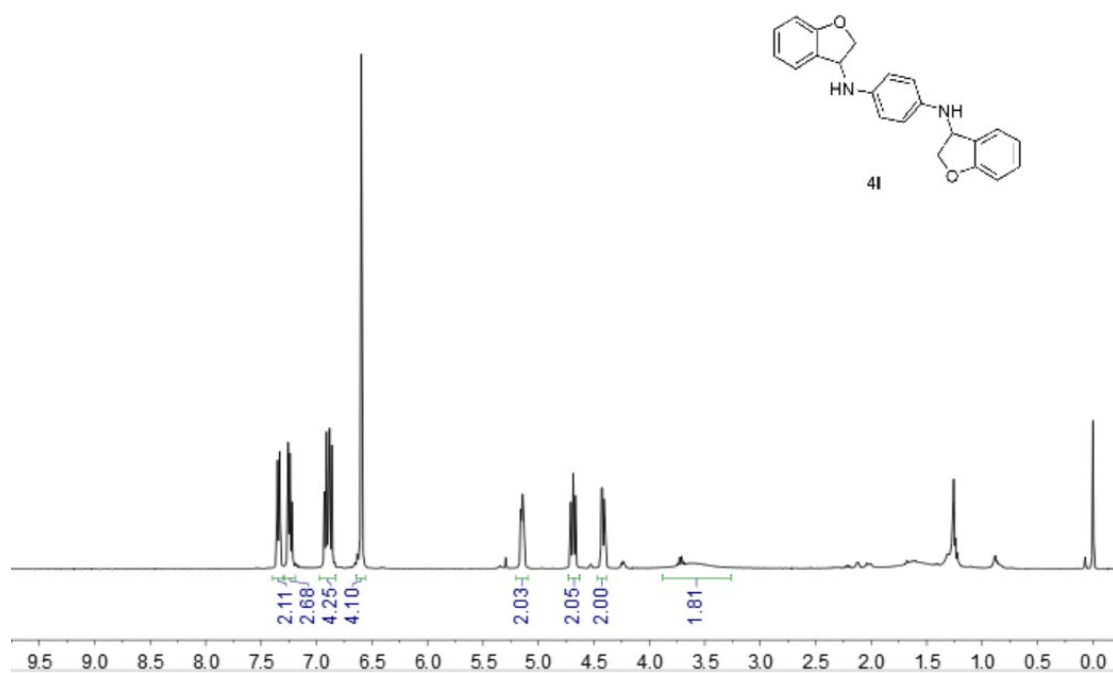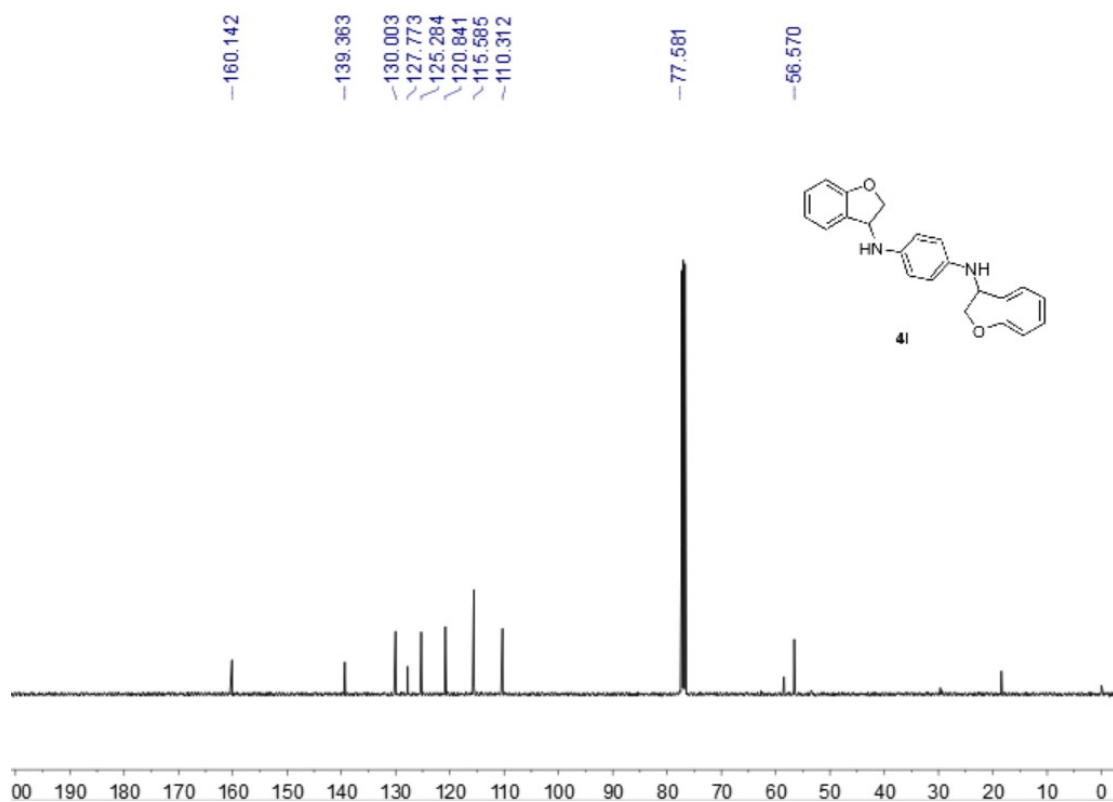

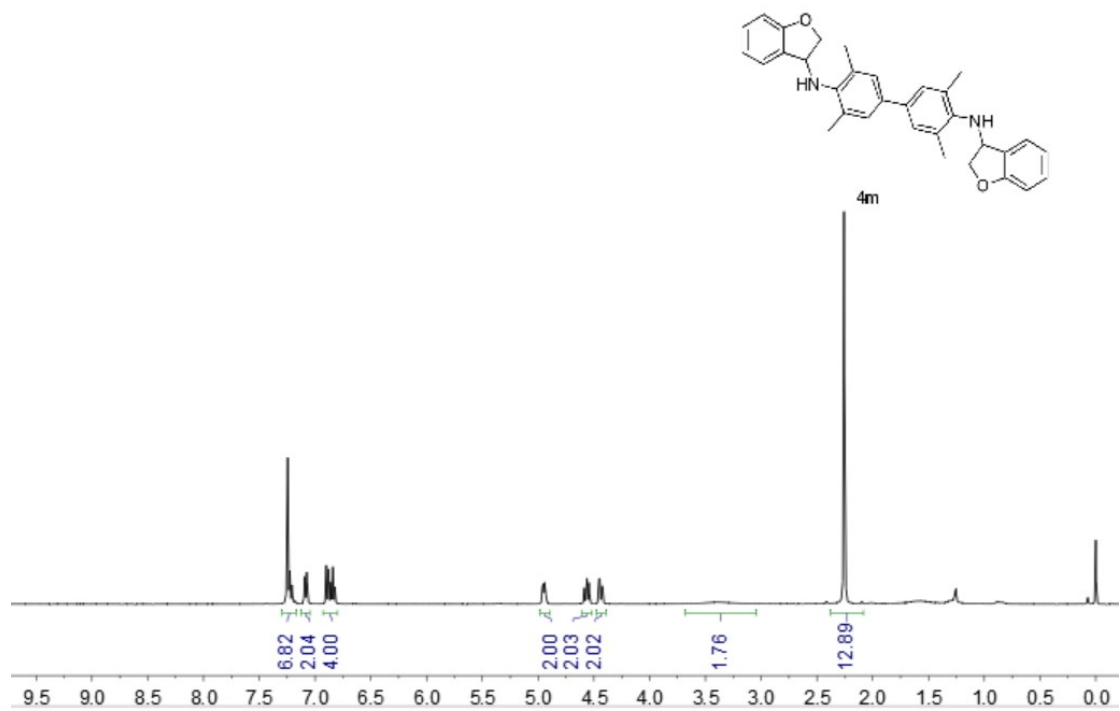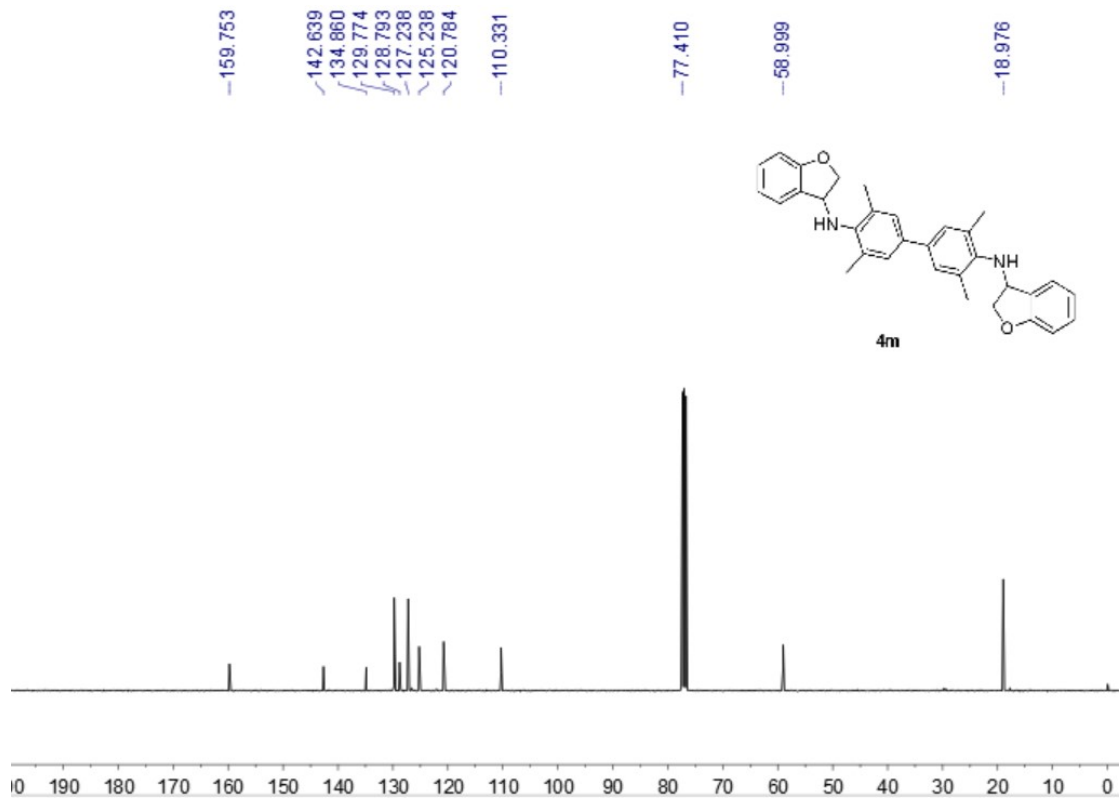

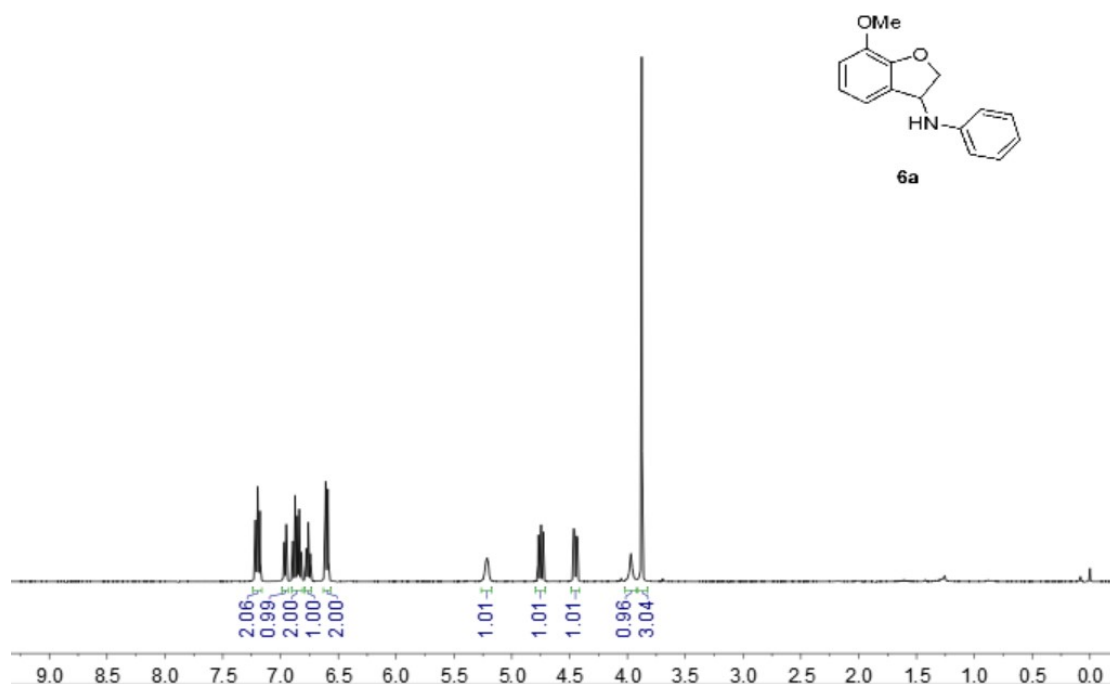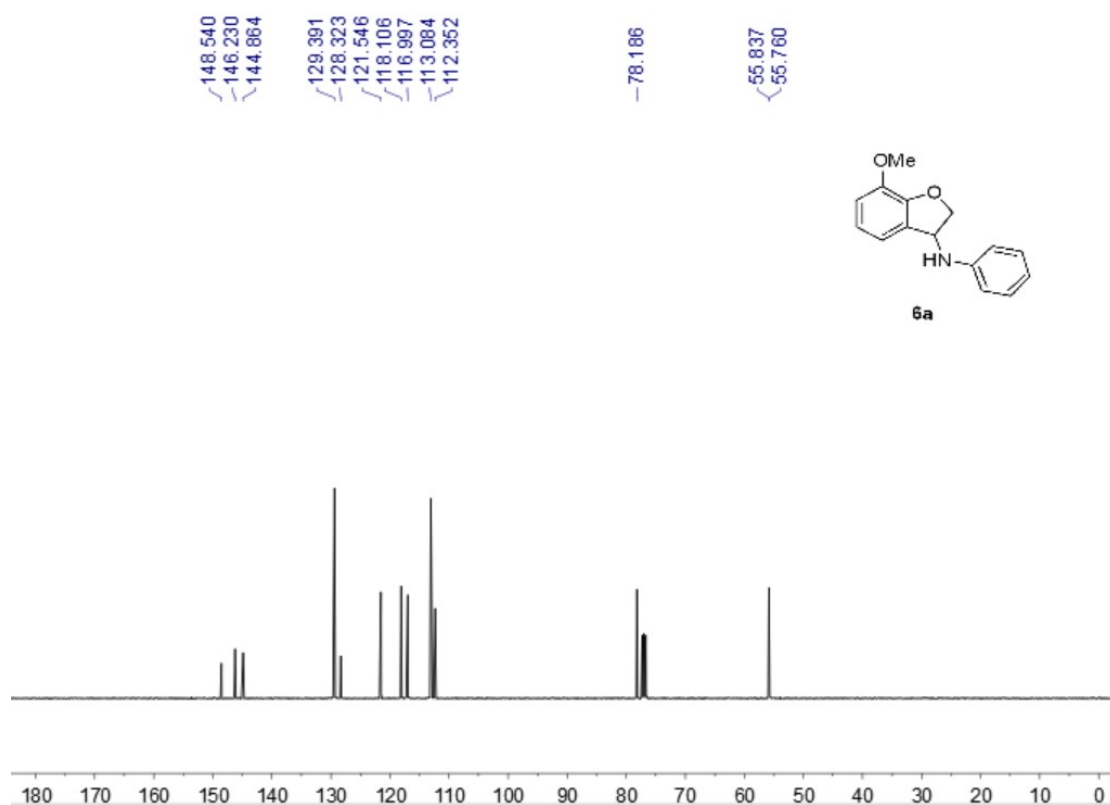

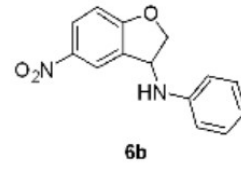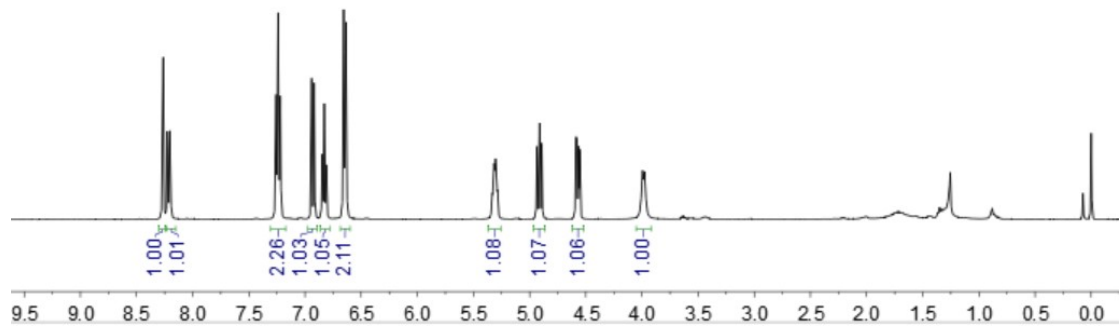

Chemical shift values (ppm) for <sup>13</sup>C NMR:

- 165.401
- 145.619
- 142.228
- 129.656
- 128.923
- 127.323
- 121.995
- 119.064
- 113.394
- 110.407
- 79.663
- 54.524

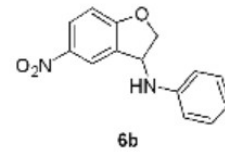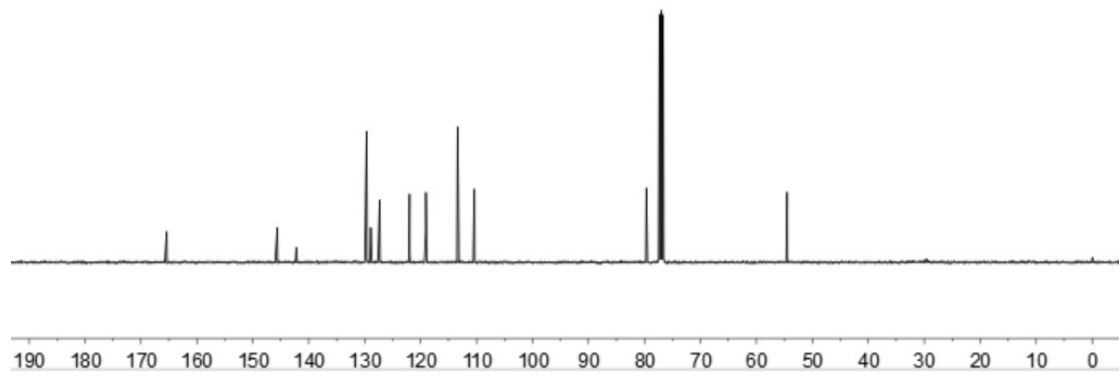

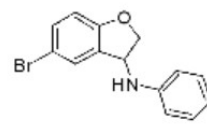

6c

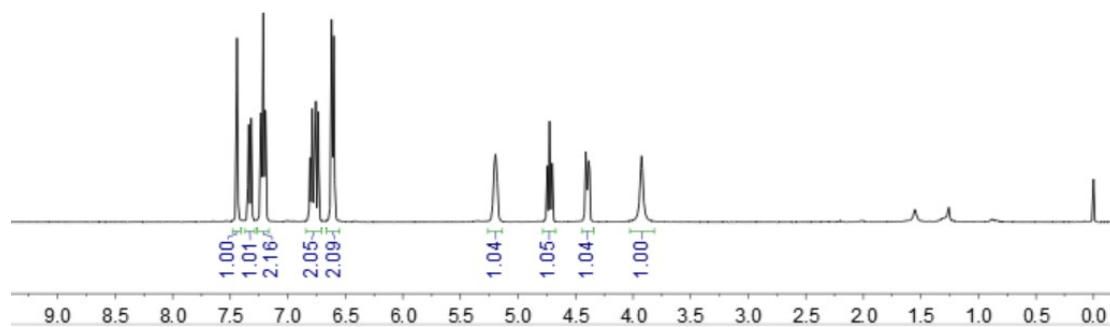

-159.343  
-146.024  
132.916  
129.798  
129.552  
128.224  
118.569  
113.241  
112.499  
111.981  
-78.196  
-55.212

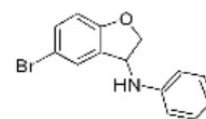

6c

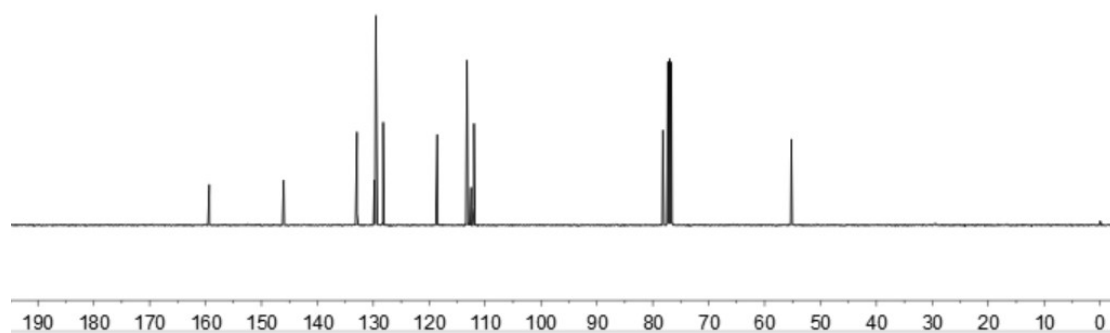



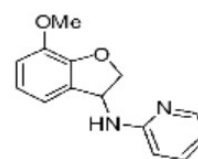

6d

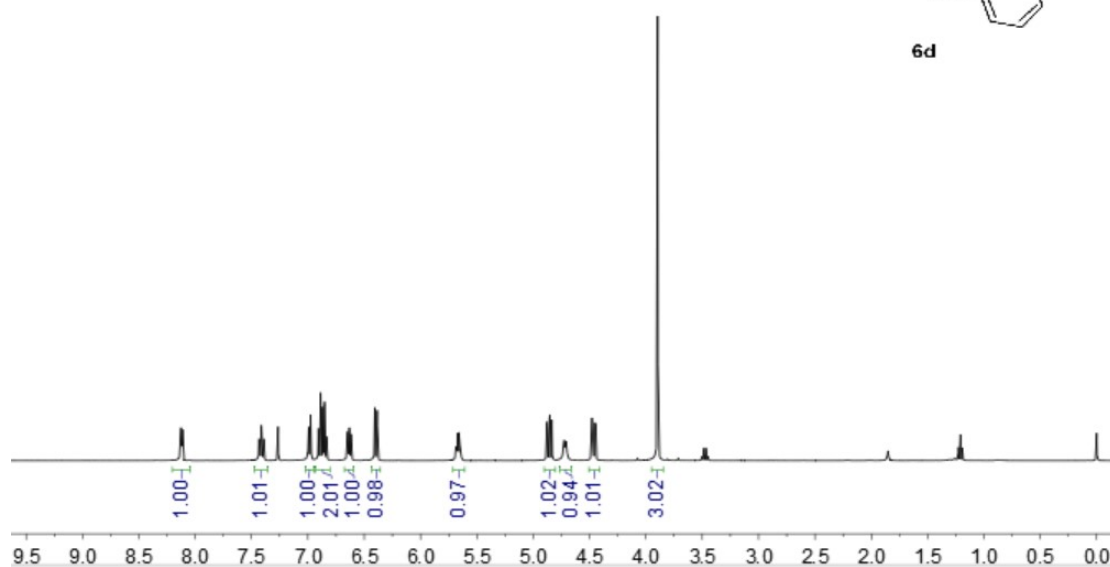

157.124  
148.877  
147.940  
144.896  
137.320  
128.265  
121.526  
117.064  
113.552  
112.340  
108.427  
79.134  
55.904  
54.016

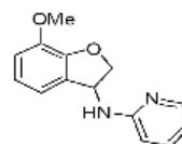

6d

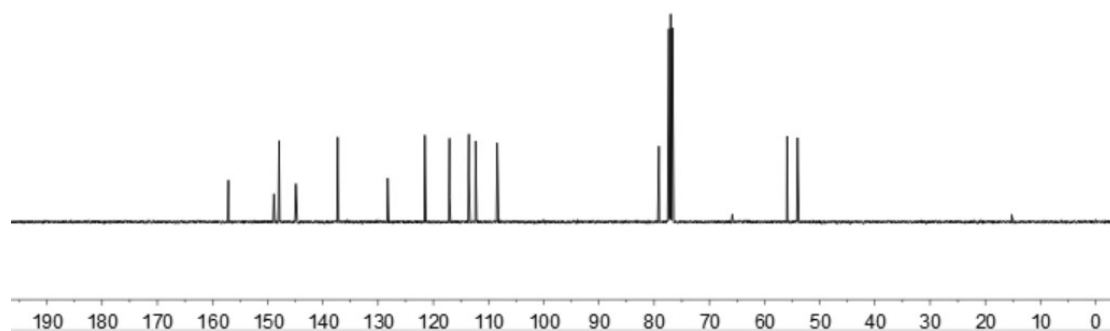

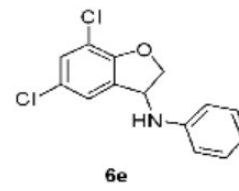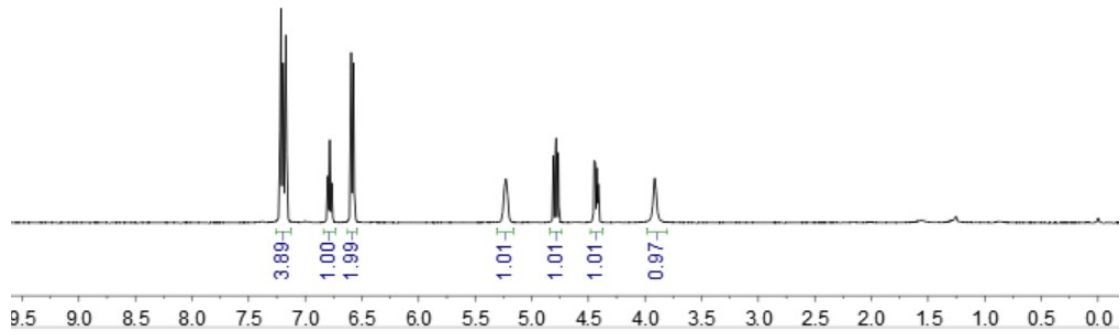

Chemical shift values (ppm):  
-154.820  
-145.662  
-130.381  
-129.782  
-129.538  
-125.827  
-123.763  
-118.808  
-116.222  
-113.314  
-78.632  
-55.808

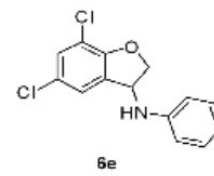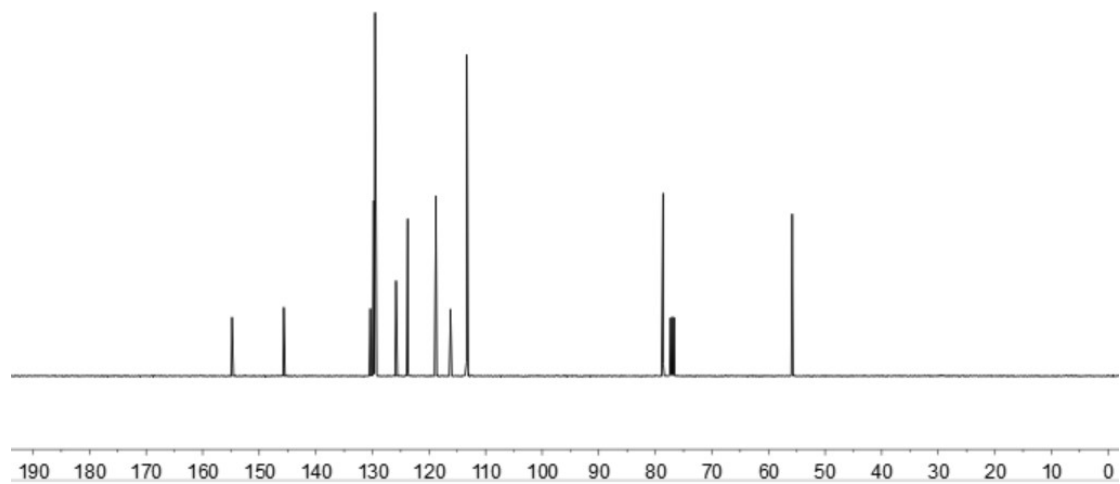

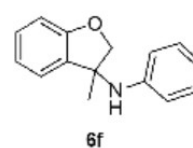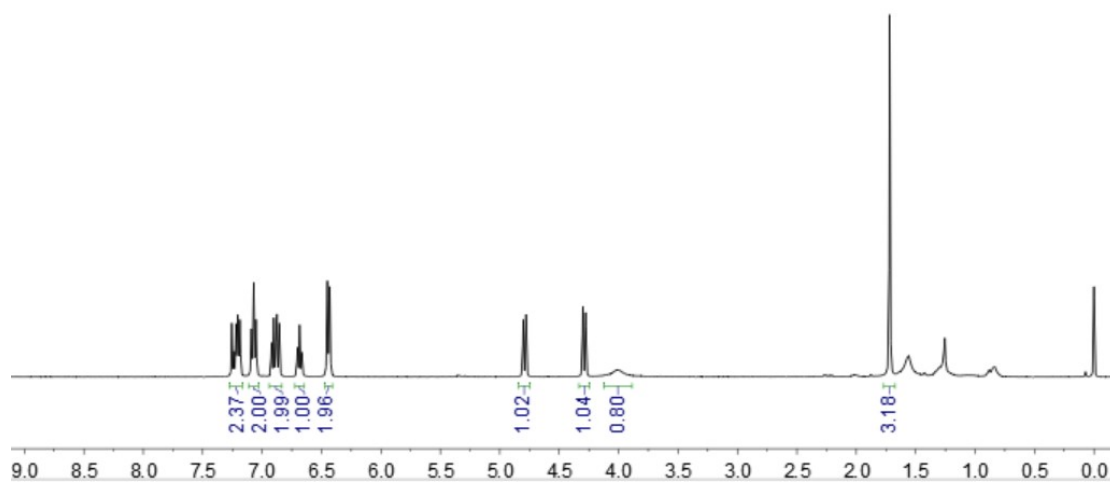

Chemical shift values (ppm):  
-159.473  
-144.913  
-132.034  
-129.468  
-129.116  
-123.030  
-120.965  
-118.075  
-114.983  
-110.268  
-79.205  
-62.005  
-29.218

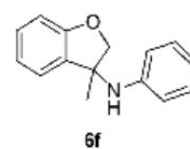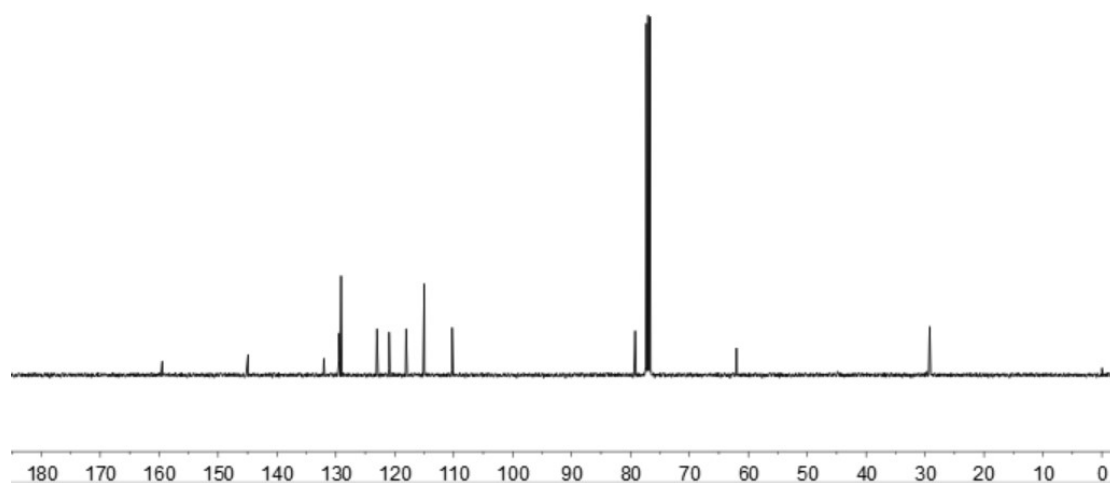

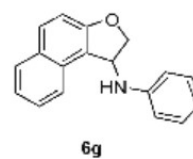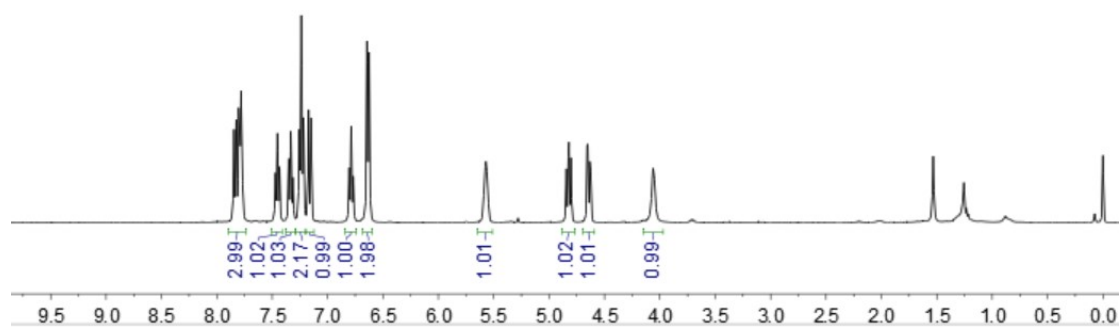

Chemical shift values (ppm):  
-158.419  
-146.538  
-131.444  
-130.614  
-129.545  
-128.854  
-127.361  
-123.318  
-122.389  
-118.022  
-117.916  
-113.063  
-112.531  
-78.730  
-55.131

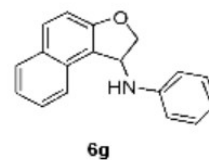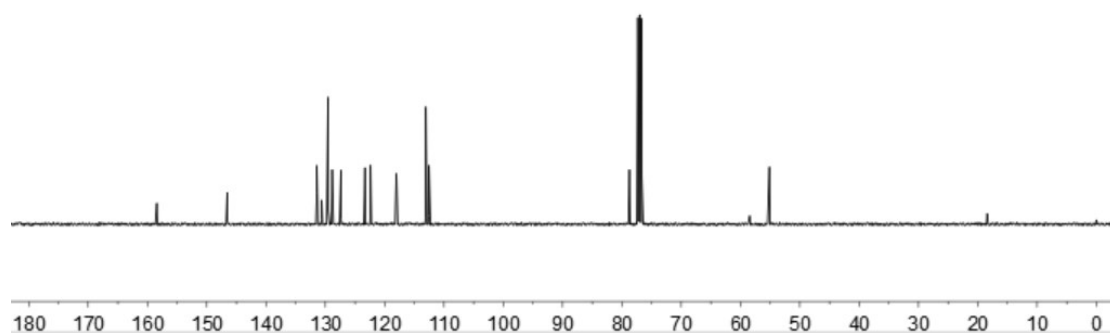

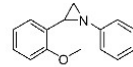

2a'

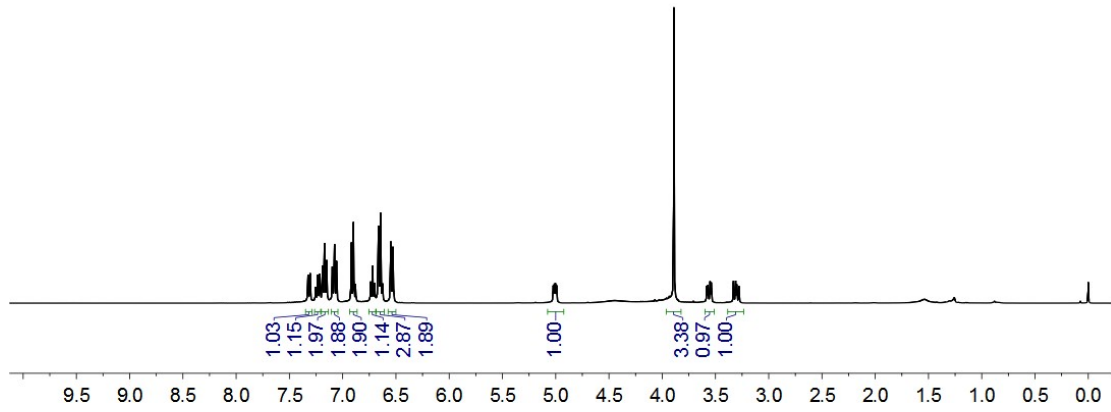

157.008  
148.149  
147.297  
129.242  
129.089  
128.642  
128.414  
127.385  
120.862  
117.753  
117.594  
113.658  
113.188  
110.595  
55.301  
52.559  
48.710

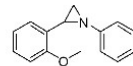

2a'

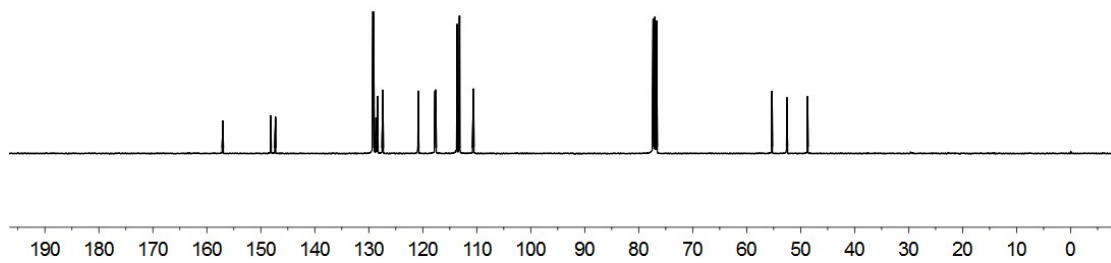

Supplement: d2nj03131k1.pdf [file d2nj03131k1.pdf]
